# Supplementary material for: Patient-reported outcomes before treatment for localized prostate cancer: are there differences among countries? Data from the True North Global Registry
Source: PubMed Central journal article supplement (PMC10623840; doi:10.1186/s12894-023-01344-0), 2023-11-03
Supplement: 12894_2023_1344_MOESM1_ESM.pdf [file 12894_2023_1344_MOESM1_ESM.pdf]

**Validation studies of each EPIC-26 country version.**

|                                 |                                  |                                                                                                                                                                                                                                                                                 |
|---------------------------------|----------------------------------|---------------------------------------------------------------------------------------------------------------------------------------------------------------------------------------------------------------------------------------------------------------------------------|
| <b>United States of America</b> | <b>English version (EPIC-26)</b> | Szymanski KM, Wei JT, Dunn RL, Sanda MG. Development and validation of an abbreviated version of the expanded prostate cancer index composite instrument for measuring health-related quality of life among prostate cancer survivors. <i>Urology</i> . 2010 Nov;76(5):1245-50. |
| <b>Canada</b>                   |                                  |                                                                                                                                                                                                                                                                                 |
| <b>United Kingdom</b>           |                                  |                                                                                                                                                                                                                                                                                 |
| <b>Australia</b>                |                                  |                                                                                                                                                                                                                                                                                 |
| <b>New Zealand</b>              |                                  |                                                                                                                                                                                                                                                                                 |
| <b>Canada</b>                   | <b>French version (EPIC-26)</b>  | Vigneault E, Savard J, Savard MH, et al. Validation of the French-Canadian version of the Expanded Prostate Cancer Index Composite (EPIC) in a French-Canadian population. <i>Journal de l'Association des urologues du Canada</i> . 2017;11(12):404-410.                       |
| <b>Germany</b>                  | <b>German version (EPIC-26)</b>  | Sibert NT, Dieng S, Oesterle A, et al. Psychometric validation of the German version of the EPIC-26 questionnaire for patients with localized and locally advanced prostate cancer. <i>World J Urol</i> . 2021 Jan;39(1):11-25.                                                 |
| <b>Austria</b>                  |                                  |                                                                                                                                                                                                                                                                                 |
| <b>Italy</b>                    | <b>Italian version (EPIC-26)</b> | Marzorati C, Monzani D, Mazzocco K, et al. Validation of the Italian version of the abbreviated expanded prostate Cancer index composite (EPIC-26) in men with prostate Cancer. <i>Health Qual Life Outcomes</i> . 2019 Aug 29;17(1):147.                                       |
| <b>Spain</b>                    | <b>Spanish version (EPIC-50)</b> | Ferrer M, Garin O, Pera J, et al. [Evaluation of the quality of life of patients with localized prostate cancer: validation of the Spanish version of the EPIC]. <i>Med Clin (Barc)</i> . 2009 Feb 7;132(4):128-35.                                                             |
| <b>Czech Republic</b>           | [not available]                  |                                                                                                                                                                                                                                                                                 |

Flowchart of participants included in the study:

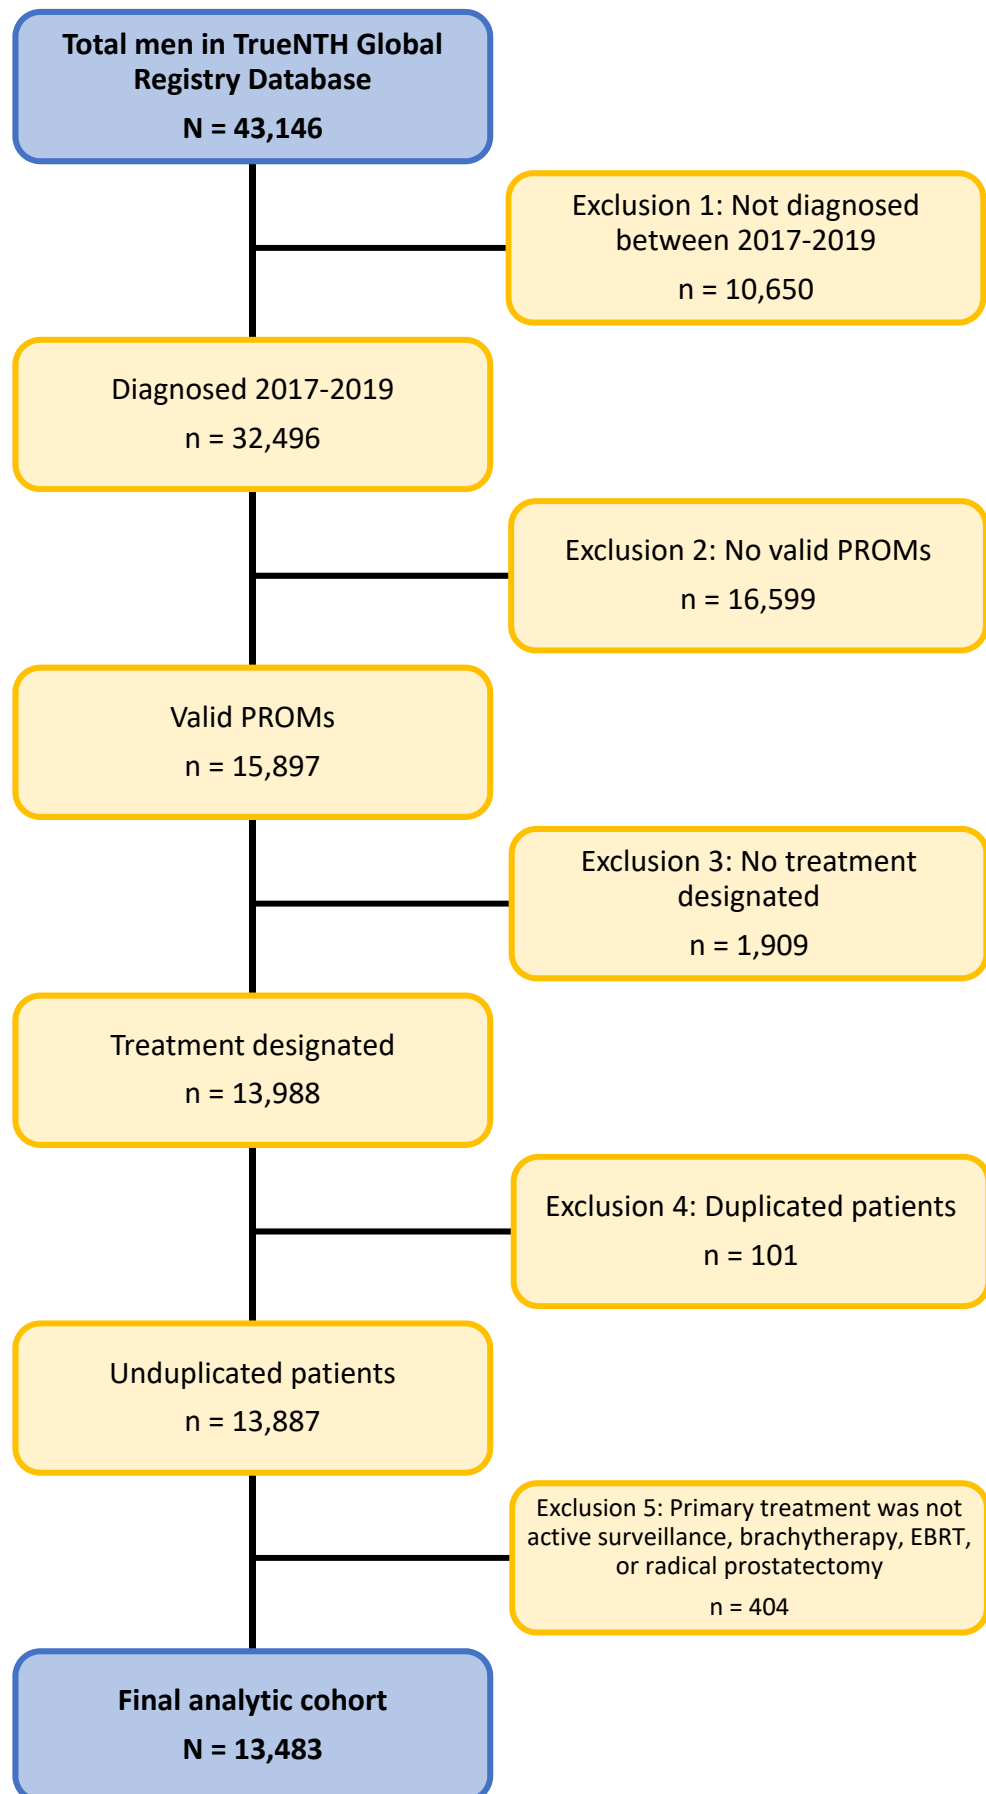

EPIC-26 Baseline (pre-treatment) Results

| Statistic Variable or Category                                                                         | TNGR Global (n=13483) | Australia/New Zealand (n=688) | Canada (n=1640)      | Central Europe (n=8398) | United Kingdom (n=202) | Italy (n=477)        | Spain (n=165)         | USA (n=1913)         | P Value |
|--------------------------------------------------------------------------------------------------------|-----------------------|-------------------------------|----------------------|-------------------------|------------------------|----------------------|-----------------------|----------------------|---------|
| Urinary Incontinence                                                                                   |                       |                               |                      |                         |                        |                      |                       |                      | .       |
| n                                                                                                      | 12855                 | 663                           | 1584                 | 7919                    | 196                    | 472                  | 165                   | 1856                 | <.0001  |
| Mean (SD)                                                                                              | 92.8 (13.99)          | 92.9 (13.32)                  | 93.3 (13.05)         | 93.1 (13.75)            | 93.1 (13.64)           | 92.0 (16.32)         | 92.7 (17.06)          | 91.3 (15.01)         | .       |
| Median (Q1-Q3)                                                                                         | 100.0 (91.8 - 100.0)  | 100.0 (91.8 - 100.0)          | 100.0 (91.8 - 100.0) | 100.0 (91.8 - 100.0)    | 100.0 (91.8 - 100.0)   | 100.0 (91.8 - 100.0) | 100.0 (100.0 - 100.0) | 100.0 (85.5 - 100.0) | .       |
| Min, Max                                                                                               | 0.0, 100.0            | 22.8, 100.0                   | 6.3, 100.0           | 0.0, 100.0              | 14.5, 100.0            | 0.0, 100.0           | 33.3, 100.0           | 8.3, 100.0           | .       |
| Over the past 4 weeks, how often have you leaked urine?                                                |                       |                               |                      |                         |                        |                      |                       |                      | .       |
| More than once a day                                                                                   | 515 (3.9%)            | 35 (5.1%)                     | 71 (4.4%)            | 281 (3.4%)              | 9 (4.5%)               | 13 (2.7%)            | 3 (1.8%)              | 103 (5.4%)           | <.0001  |
| About once a day                                                                                       | 456 (3.4%)            | 32 (4.7%)                     | 50 (3.1%)            | 234 (2.8%)              | 9 (4.5%)               | 23 (4.8%)            | 7 (4.2%)              | 101 (5.3%)           | .       |
| More than once a week                                                                                  | 392 (2.9%)            | 25 (3.7%)                     | 50 (3.1%)            | 197 (2.4%)              | 5 (2.5%)               | 15 (3.2%)            | 12 (7.3%)             | 88 (4.6%)            | .       |
| About once a week                                                                                      | 547 (4.1%)            | 37 (5.4%)                     | 109 (6.7%)           | 254 (3.1%)              | 14 (6.9%)              | 21 (4.4%)            | 4 (2.4%)              | 108 (5.7%)           | .       |
| Rarely or never                                                                                        | 11432 (85.7%)         | 552 (81.1%)                   | 1345 (82.8%)         | 7328 (88.4%)            | 165 (81.7%)            | 404 (84.9%)          | 139 (84.2%)           | 1499 (78.9%)         | .       |
| Missing                                                                                                | 141                   | 7                             | 15                   | 104                     |                        | 1                    |                       | 14                   | .       |
| Which of the following best describes your urinary control during the last 4 weeks?                    |                       |                               |                      |                         |                        |                      |                       |                      | .       |
| No urinary control whatsoever                                                                          | 223 (1.7%)            | 2 (0.3%)                      | 18 (1.1%)            | 167 (2.0%)              | 0 (0.0%)               | 16 (3.4%)            | 0 (0.0%)              | 20 (1.1%)            | <.0001  |
| Frequent dribbling                                                                                     | 355 (2.7%)            | 12 (1.8%)                     | 38 (2.3%)            | 212 (2.6%)              | 6 (3.0%)               | 25 (5.3%)            | 13 (7.9%)             | 49 (2.6%)            | .       |
| Occasional dribbling                                                                                   | 2957 (22.1%)          | 158 (23.2%)                   | 334 (20.5%)          | 1830 (22.0%)            | 49 (24.5%)             | 68 (14.3%)           | 14 (8.5%)             | 504 (26.5%)          | .       |
| Total control                                                                                          | 9825 (73.5%)          | 510 (74.8%)                   | 1237 (76.0%)         | 6098 (73.4%)            | 145 (72.5%)            | 367 (77.1%)          | 138 (83.6%)           | 1330 (69.9%)         | .       |
| Missing                                                                                                | 123                   | 6                             | 13                   | 91                      | 2                      | 1                    |                       | 10                   | .       |
| How many pads or adult diapers per day did you usually use to control leakage during the last 4 weeks? |                       |                               |                      |                         |                        |                      |                       |                      | .       |
| None                                                                                                   | 12969 (97.1%)         | 673 (98.5%)                   | 1579 (98.6%)         | 8035 (96.4%)            | 195 (98.5%)            | 451 (94.7%)          | 165 (100.0%)          | 1871 (98.4%)         | <.0001  |
| 1 pad per day                                                                                          | 285 (2.1%)            | 9 (1.3%)                      | 17 (1.1%)            | 227 (2.7%)              | 2 (1.0%)               | 11 (2.3%)            | 0 (0.0%)              | 19 (1.0%)            | .       |
| 2 pads per day                                                                                         | 64 (0.5%)             | 1 (0.1%)                      | 3 (0.2%)             | 44 (0.5%)               | 0 (0.0%)               | 9 (1.9%)             | 0 (0.0%)              | 7 (0.4%)             | .       |
| 3 or more pads per day                                                                                 | 40 (0.3%)             | 0 (0.0%)                      | 3 (0.2%)             | 27 (0.3%)               | 1 (0.5%)               | 5 (1.1%)             | 0 (0.0%)              | 4 (0.2%)             | .       |
| Missing                                                                                                | 125                   | 5                             | 38                   | 65                      | 4                      | 1                    |                       | 12                   | .       |

EPIC-26 Baseline (pre-treatment) Results

| Statistic Variable or Category                                                                    | TNGR Global (n=13483) | Australia/New Zealand (n=688) | Canada (n=1640)     | Central Europe (n=8398) | United Kingdom (n=202) | Italy (n=477)       | Spain (n=165)        | USA (n=1913)        | P Value |
|---------------------------------------------------------------------------------------------------|-----------------------|-------------------------------|---------------------|-------------------------|------------------------|---------------------|----------------------|---------------------|---------|
| How big a problem, if any, has dripping or leaking urine been for you during the last 4 weeks?    |                       |                               |                     |                         |                        |                     |                      |                     |         |
| No problem                                                                                        | 10192 (78.0%)         | 513 (76.5%)                   | 1261 (77.4%)        | 6376 (79.2%)            | 159 (78.7%)            | 369 (78.2%)         | 137 (83.0%)          | 1377 (73.8%)        | <.0001  |
| Very small problem                                                                                | 1915 (14.7%)          | 122 (18.2%)                   | 273 (16.7%)         | 1084 (13.5%)            | 32 (15.8%)             | 65 (13.8%)          | 0 (0.0%)             | 339 (18.2%)         | .       |
| Small problem                                                                                     | 603 (4.6%)            | 23 (3.4%)                     | 69 (4.2%)           | 361 (4.5%)              | 6 (3.0%)               | 27 (5.7%)           | 12 (7.3%)            | 105 (5.6%)          | .       |
| Moderate problem                                                                                  | 271 (2.1%)            | 12 (1.8%)                     | 24 (1.5%)           | 174 (2.2%)              | 5 (2.5%)               | 8 (1.7%)            | 10 (6.1%)            | 38 (2.0%)           | .       |
| Big problem                                                                                       | 79 (0.6%)             | 1 (0.1%)                      | 3 (0.2%)            | 58 (0.7%)               | 0 (0.0%)               | 3 (0.6%)            | 6 (3.6%)             | 8 (0.4%)            | .       |
| Missing                                                                                           | 423                   | 17                            | 10                  | 345                     |                        | 5                   |                      | 46                  | .       |
| Urinary Irritative/Obst.                                                                          |                       |                               |                     |                         |                        |                     |                      |                     |         |
| n                                                                                                 | 12765                 | 649                           | 1625                | 7832                    | 195                    | 471                 | 165                  | 1828                | <.0001  |
| Mean (SD)                                                                                         | 86.0 (15.51)          | 85.4 (15.41)                  | 87.3 (14.52)        | 86.1 (15.59)            | 84.6 (14.49)           | 84.4 (17.30)        | 88.9 (15.77)         | 84.9 (15.56)        | .       |
| Median (Q1-Q3)                                                                                    | 87.5 (75.0 - 100.0)   | 87.5 (81.3 - 100.0)           | 93.8 (81.3 - 100.0) | 87.5 (75.0 - 100.0)     | 87.5 (75.0 - 100.0)    | 87.5 (75.0 - 100.0) | 100.0 (87.5 - 100.0) | 87.5 (75.0 - 100.0) | .       |
| Min, Max                                                                                          | 0.0, 100.0            | 12.5, 100.0                   | 12.5, 100.0         | 0.0, 100.0              | 31.3, 100.0            | 18.8, 100.0         | 25.0, 100.0          | 6.3, 100.0          | .       |
| How big a problem, if any, has pain or burning on urination been for you during the last 4 weeks? |                       |                               |                     |                         |                        |                     |                      |                     |         |
| No problem                                                                                        | 11299 (86.9%)         | 583 (87.1%)                   | 1432 (87.7%)        | 6997 (87.3%)            | 175 (87.1%)            | 359 (76.2%)         | 139 (84.2%)          | 1614 (86.9%)        | <.0001  |
| Very small problem                                                                                | 1011 (7.8%)           | 58 (8.7%)                     | 142 (8.7%)          | 586 (7.3%)              | 17 (8.5%)              | 74 (15.7%)          | 3 (1.8%)             | 131 (7.1%)          | .       |
| Small problem                                                                                     | 385 (3.0%)            | 13 (1.9%)                     | 31 (1.9%)           | 223 (2.8%)              | 4 (2.0%)               | 23 (4.9%)           | 17 (10.3%)           | 74 (4.0%)           | .       |
| Moderate problem                                                                                  | 225 (1.7%)            | 13 (1.9%)                     | 18 (1.1%)           | 141 (1.8%)              | 4 (2.0%)               | 13 (2.8%)           | 4 (2.4%)             | 32 (1.7%)           | .       |
| Big problem                                                                                       | 89 (0.7%)             | 2 (0.3%)                      | 10 (0.6%)           | 66 (0.8%)               | 1 (0.5%)               | 2 (0.4%)            | 2 (1.2%)             | 6 (0.3%)            | .       |
| Missing                                                                                           | 474                   | 19                            | 7                   | 385                     | 1                      | 6                   |                      | 56                  | .       |
| How big a problem, if any, has bleeding with urination been for you during the last 4 weeks?      |                       |                               |                     |                         |                        |                     |                      |                     |         |
| No problem                                                                                        | 12176 (94.1%)         | 600 (89.3%)                   | 1519 (93.1%)        | 7566 (95.2%)            | 183 (92.9%)            | 439 (93.2%)         | 164 (99.4%)          | 1705 (92.1%)        | <.0001  |
| Very small problem                                                                                | 456 (3.5%)            | 50 (7.4%)                     | 83 (5.1%)           | 206 (2.6%)              | 7 (3.6%)               | 14 (3.0%)           | 0 (0.0%)             | 96 (5.2%)           | .       |
| Small problem                                                                                     | 183 (1.4%)            | 18 (2.7%)                     | 15 (0.9%)           | 101 (1.3%)              | 3 (1.5%)               | 11 (2.3%)           | 0 (0.0%)             | 35 (1.9%)           | .       |
| Moderate problem                                                                                  | 95 (0.7%)             | 4 (0.6%)                      | 15 (0.9%)           | 55 (0.7%)               | 4 (2.0%)               | 4 (0.8%)            | 0 (0.0%)             | 13 (0.7%)           | .       |
| Big problem                                                                                       | 29 (0.2%)             | 0 (0.0%)                      | 0 (0.0%)            | 22 (0.3%)               | 0 (0.0%)               | 3 (0.6%)            | 1 (0.6%)             | 3 (0.2%)            | .       |

EPIC-26 Baseline (pre-treatment) Results

| Statistic Variable or Category                                                                                 | TNGR Global (n=13483) | Australia/New Zealand (n=688) | Canada (n=1640) | Central Europe (n=8398) | United Kingdom (n=202) | Italy (n=477) | Spain (n=165) | USA (n=1913) | P Value |
|----------------------------------------------------------------------------------------------------------------|-----------------------|-------------------------------|-----------------|-------------------------|------------------------|---------------|---------------|--------------|---------|
| Missing                                                                                                        | 544                   | 16                            | 8               | 448                     | 5                      | 6             |               | 61           | .       |
| How big a problem, if any, has weak urine stream been for you during the last 4 weeks?                         |                       |                               |                 |                         |                        |               |               |              | .       |
| No problem                                                                                                     | 6361 (48.5%)          | 303 (45.0%)                   | 845 (51.8%)     | 3874 (47.8%)            | 94 (47.2%)             | 240 (50.8%)   | 108 (65.5%)   | 897 (48.1%)  | <.0001  |
| Very small problem                                                                                             | 3194 (24.4%)          | 190 (28.2%)                   | 402 (24.7%)     | 2014 (24.8%)            | 50 (25.1%)             | 105 (22.2%)   | 2 (1.2%)      | 431 (23.1%)  | .       |
| Small problem                                                                                                  | 1930 (14.7%)          | 97 (14.4%)                    | 232 (14.2%)     | 1193 (14.7%)            | 24 (12.1%)             | 66 (14.0%)    | 34 (20.6%)    | 284 (15.2%)  | .       |
| Moderate problem                                                                                               | 1244 (9.5%)           | 69 (10.2%)                    | 121 (7.4%)      | 770 (9.5%)              | 29 (14.6%)             | 51 (10.8%)    | 15 (9.1%)     | 189 (10.1%)  | .       |
| Big problem                                                                                                    | 384 (2.9%)            | 15 (2.2%)                     | 30 (1.8%)       | 259 (3.2%)              | 2 (1.0%)               | 10 (2.1%)     | 6 (3.6%)      | 62 (3.3%)    | .       |
| Missing                                                                                                        | 370                   | 14                            | 10              | 288                     | 3                      | 5             |               | 50           | .       |
| How big a problem, if any, has need to urinate frequently during the day been for you during the last 4 weeks? |                       |                               |                 |                         |                        |               |               |              | .       |
| No problem                                                                                                     | 6043 (45.8%)          | 295 (44.2%)                   | 795 (48.6%)     | 3792 (46.4%)            | 76 (37.8%)             | 207 (43.8%)   | 129 (78.2%)   | 749 (39.9%)  | <.0001  |
| Very small problem                                                                                             | 2985 (22.6%)          | 167 (25.0%)                   | 397 (24.3%)     | 1801 (22.1%)            | 50 (24.9%)             | 108 (22.8%)   | 1 (0.6%)      | 461 (24.6%)  | .       |
| Small problem                                                                                                  | 2108 (16.0%)          | 111 (16.6%)                   | 231 (14.1%)     | 1296 (15.9%)            | 43 (21.4%)             | 74 (15.6%)    | 17 (10.3%)    | 336 (17.9%)  | .       |
| Moderate problem                                                                                               | 1576 (12.0%)          | 81 (12.1%)                    | 171 (10.5%)     | 959 (11.7%)             | 30 (14.9%)             | 66 (14.0%)    | 13 (7.9%)     | 256 (13.6%)  | .       |
| Big problem                                                                                                    | 471 (3.6%)            | 14 (2.1%)                     | 42 (2.6%)       | 316 (3.9%)              | 2 (1.0%)               | 18 (3.8%)     | 5 (3.0%)      | 74 (3.9%)    | .       |
| Missing                                                                                                        | 300                   | 20                            | 4               | 234                     | 1                      | 4             |               | 37           | .       |
| Overall how big a problem has your urinary function been for you during the last 4 weeks?                      |                       |                               |                 |                         |                        |               |               |              | .       |
| No problem                                                                                                     | 7698 (58.2%)          | 354 (52.0%)                   | 946 (58.1%)     | 4965 (60.7%)            | 96 (47.5%)             | 247 (51.9%)   | 99 (60.0%)    | 991 (52.1%)  | <.0001  |
| Very small problem                                                                                             | 2780 (21.0%)          | 200 (29.4%)                   | 366 (22.5%)     | 1579 (19.3%)            | 51 (25.2%)             | 106 (22.3%)   | 1 (0.6%)      | 477 (25.1%)  | .       |
| Small problem                                                                                                  | 1449 (10.9%)          | 69 (10.1%)                    | 187 (11.5%)     | 819 (10.0%)             | 33 (16.3%)             | 62 (13.0%)    | 36 (21.8%)    | 243 (12.8%)  | .       |
| Moderate problem                                                                                               | 1031 (7.8%)           | 53 (7.8%)                     | 109 (6.7%)      | 625 (7.6%)              | 22 (10.9%)             | 54 (11.3%)    | 21 (12.7%)    | 147 (7.7%)   | .       |
| Big problem                                                                                                    | 276 (2.1%)            | 5 (0.7%)                      | 21 (1.3%)       | 191 (2.3%)              | 0 (0.0%)               | 7 (1.5%)      | 8 (4.8%)      | 44 (2.3%)    | .       |
| Missing                                                                                                        | 249                   | 7                             | 11              | 219                     |                        | 1             |               | 11           | .       |
| Bowel                                                                                                          |                       |                               |                 |                         |                        |               |               |              | .       |
| n                                                                                                              | 12850                 | 675                           | 1631            | 7849                    | 195                    | 463           | 165           | 1872         | <.0001  |
| Mean (SD)                                                                                                      | 95.5 (9.84)           | 93.8 (11.02)                  | 95.5 (9.98)     | 96.0 (9.27)             | 94.2 (11.93)           | 93.4 (11.40)  | 97.7 (8.97)   | 94.5 (10.75) | .       |





EPIC-26 Baseline (pre-treatment) Results

| Statistic Variable or Category                                                      | TNGR Global (n=13483) | Australia/New Zealand (n=688) | Canada (n=1640) | Central Europe (n=8398) | United Kingdom (n=202) | Italy (n=477) | Spain (n=165) | USA (n=1913) | P Value |
|-------------------------------------------------------------------------------------|-----------------------|-------------------------------|-----------------|-------------------------|------------------------|---------------|---------------|--------------|---------|
| How would you rate your ability to have an erection during the last 4 weeks?        |                       |                               |                 |                         |                        |               |               |              | .       |
| Very poor to none                                                                   | 1834 (14.3%)          | 76 (11.3%)                    | 181 (11.3%)     | 1119 (14.2%)            | 45 (22.5%)             | 91 (19.2%)    | 35 (21.2%)    | 287 (15.5%)  | <.0001  |
| Poor                                                                                | 1873 (14.6%)          | 98 (14.6%)                    | 248 (15.5%)     | 1132 (14.4%)            | 28 (14.0%)             | 98 (20.7%)    | 17 (10.3%)    | 252 (13.6%)  | .       |
| Fair                                                                                | 3204 (24.9%)          | 151 (22.4%)                   | 359 (22.4%)     | 2074 (26.3%)            | 45 (22.5%)             | 141 (29.7%)   | 25 (15.2%)    | 409 (22.0%)  | .       |
| Good                                                                                | 3844 (29.9%)          | 200 (29.7%)                   | 553 (34.5%)     | 2381 (30.2%)            | 54 (27.0%)             | 107 (22.6%)   | 85 (51.5%)    | 464 (25.0%)  | .       |
| Very good                                                                           | 2101 (16.3%)          | 148 (22.0%)                   | 261 (16.3%)     | 1181 (15.0%)            | 28 (14.0%)             | 37 (7.8%)     | 3 (1.8%)      | 443 (23.9%)  | .       |
| Missing                                                                             | 627                   | 15                            | 38              | 511                     | 2                      | 3             |               | 58           | .       |
| How would you rate your ability to reach orgasm (climax) during the last 4 weeks?   |                       |                               |                 |                         |                        |               |               |              | .       |
| Very poor to none                                                                   | 1708 (13.5%)          | 79 (12.0%)                    | 179 (11.2%)     | 1031 (13.3%)            | 41 (20.8%)             | 84 (17.9%)    | 37 (22.4%)    | 257 (14.2%)  | <.0001  |
| Poor                                                                                | 1552 (12.3%)          | 74 (11.2%)                    | 197 (12.3%)     | 975 (12.6%)             | 24 (12.2%)             | 78 (16.6%)    | 11 (6.7%)     | 193 (10.6%)  | .       |
| Fair                                                                                | 2763 (21.9%)          | 139 (21.0%)                   | 337 (21.1%)     | 1785 (23.1%)            | 43 (21.8%)             | 145 (30.9%)   | 13 (7.9%)     | 301 (16.6%)  | .       |
| Good                                                                                | 4209 (33.3%)          | 216 (32.7%)                   | 569 (35.7%)     | 2639 (34.2%)            | 50 (25.4%)             | 120 (25.5%)   | 102 (61.8%)   | 513 (28.2%)  | .       |
| Very good                                                                           | 2397 (19.0%)          | 153 (23.1%)                   | 314 (19.7%)     | 1294 (16.8%)            | 39 (19.8%)             | 43 (9.1%)     | 2 (1.2%)      | 552 (30.4%)  | .       |
| Missing                                                                             | 854                   | 27                            | 44              | 674                     | 5                      | 7             |               | 97           | .       |
| How would you describe the usual quality of your erections during the last 4 weeks? |                       |                               |                 |                         |                        |               |               |              | .       |
| None at all                                                                         | 1869 (14.7%)          | 74 (11.1%)                    | 150 (9.4%)      | 1266 (16.2%)            | 32 (16.0%)             | 78 (16.5%)    | 33 (20.0%)    | 236 (12.8%)  | <.0001  |
| Not firm enough for any sexual activity                                             | 1655 (13.0%)          | 73 (10.9%)                    | 230 (14.5%)     | 1015 (13.0%)            | 35 (17.5%)             | 74 (15.6%)    | 11 (6.7%)     | 217 (11.8%)  | .       |
| Firm enough for masturbation and foreplay                                           | 2360 (18.5%)          | 125 (18.7%)                   | 310 (19.5%)     | 1487 (19.1%)            | 38 (19.0%)             | 72 (15.2%)    | 18 (10.9%)    | 310 (16.9%)  | .       |
| Firm enough for intercourse                                                         | 6855 (53.8%)          | 397 (59.3%)                   | 899 (56.6%)     | 4036 (51.7%)            | 95 (47.5%)             | 250 (52.7%)   | 103 (62.4%)   | 1075 (58.5%) | .       |
| Missing                                                                             | 744                   | 19                            | 51              | 594                     | 2                      | 3             |               | 75           | .       |
| How would you describe the frequency of your erections during the last 4 weeks?     |                       |                               |                 |                         |                        |               |               |              | .       |
| I never had an erection when I wanted one                                           | 1952 (15.7%)          | 85 (12.8%)                    | 180 (11.4%)     | 1245 (16.4%)            | 40 (20.2%)             | 83 (17.7%)    | 47 (28.5%)    | 272 (15.0%)  | <.0001  |



EPIC-26 Baseline (pre-treatment) Results

| Statistic Variable or Category                                                              | TNGR Global (n=13483) | Australia/New Zealand (n=688) | Canada (n=1640)      | Central Europe (n=8398) | United Kingdom (n=202) | Italy (n=477)        | Spain (n=165)       | USA (n=1913)        | P Value |
|---------------------------------------------------------------------------------------------|-----------------------|-------------------------------|----------------------|-------------------------|------------------------|----------------------|---------------------|---------------------|---------|
| I had an erection less than half the time I wanted one                                      | 1741 (14.0%)          | 81 (12.2%)                    | 218 (13.9%)          | 1132 (14.9%)            | 25 (12.6%)             | 71 (15.1%)           | 4 (2.4%)            | 210 (11.6%)         | .       |
| I had an erection about half the time I wanted one                                          | 1807 (14.5%)          | 77 (11.6%)                    | 231 (14.7%)          | 1131 (14.9%)            | 20 (10.1%)             | 129 (27.4%)          | 12 (7.3%)           | 207 (11.4%)         | .       |
| I had an erection more than half the time I wanted one                                      | 2038 (16.3%)          | 143 (21.6%)                   | 243 (15.4%)          | 1199 (15.8%)            | 28 (14.1%)             | 90 (19.1%)           | 8 (4.8%)            | 327 (18.0%)         | .       |
| I had an erection whenever I wanted one                                                     | 4931 (39.5%)          | 277 (41.8%)                   | 701 (44.6%)          | 2879 (38.0%)            | 85 (42.9%)             | 97 (20.6%)           | 94 (57.0%)          | 798 (44.0%)         | .       |
| Missing                                                                                     | 1014                  | 25                            | 67                   | 812                     | 4                      | 7                    |                     | 99                  | .       |
| Overall, how would you rate your ability to function sexually during the last 4 weeks?      |                       |                               |                      |                         |                        |                      |                     |                     | .       |
| Very poor                                                                                   | 1956 (15.4%)          | 95 (14.2%)                    | 201 (12.7%)          | 1140 (14.7%)            | 47 (24.2%)             | 110 (23.3%)          | 46 (27.9%)          | 317 (17.4%)         | <.0001  |
| Poor                                                                                        | 1937 (15.3%)          | 90 (13.5%)                    | 244 (15.4%)          | 1242 (16.0%)            | 23 (11.9%)             | 86 (18.2%)           | 21 (12.7%)          | 231 (12.6%)         | .       |
| Fair                                                                                        | 3058 (24.1%)          | 154 (23.1%)                   | 330 (20.8%)          | 2001 (25.7%)            | 41 (21.1%)             | 145 (30.7%)          | 30 (18.2%)          | 357 (19.5%)         | .       |
| Good                                                                                        | 3865 (30.5%)          | 207 (31.0%)                   | 524 (33.0%)          | 2433 (31.3%)            | 53 (27.3%)             | 101 (21.4%)          | 61 (37.0%)          | 486 (26.6%)         | .       |
| Very good                                                                                   | 1876 (14.8%)          | 121 (18.1%)                   | 287 (18.1%)          | 965 (12.4%)             | 30 (15.5%)             | 30 (6.4%)            | 7 (4.2%)            | 436 (23.9%)         | .       |
| Missing                                                                                     | 791                   | 21                            | 54                   | 617                     | 8                      | 5                    |                     | 86                  | .       |
| Overall, how big a problem have your sexual functions been for you during the last 4 weeks? |                       |                               |                      |                         |                        |                      |                     |                     | .       |
| No problem                                                                                  | 6212 (48.9%)          | 344 (51.3%)                   | 792 (49.7%)          | 3813 (49.0%)            | 98 (49.2%)             | 212 (44.9%)          | 128 (77.6%)         | 825 (45.1%)         | <.0001  |
| Very small problem                                                                          | 2018 (15.9%)          | 106 (15.8%)                   | 248 (15.5%)          | 1258 (16.2%)            | 39 (19.6%)             | 89 (18.9%)           | 0 (0.0%)            | 278 (15.2%)         | .       |
| Small problem                                                                               | 2058 (16.2%)          | 105 (15.6%)                   | 267 (16.7%)          | 1283 (16.5%)            | 26 (13.1%)             | 69 (14.6%)           | 13 (7.9%)           | 295 (16.1%)         | .       |
| Moderate problem                                                                            | 1605 (12.6%)          | 70 (10.4%)                    | 190 (11.9%)          | 980 (12.6%)             | 17 (8.5%)              | 74 (15.7%)           | 18 (10.9%)          | 256 (14.0%)         | .       |
| Big problem                                                                                 | 823 (6.5%)            | 46 (6.9%)                     | 98 (6.1%)            | 450 (5.8%)              | 19 (9.5%)              | 28 (5.9%)            | 6 (3.6%)            | 176 (9.6%)          | .       |
| Missing                                                                                     | 767                   | 17                            | 45                   | 614                     | 3                      | 5                    |                     | 83                  | .       |
| Hormonal                                                                                    |                       |                               |                      |                         |                        |                      |                     |                     | .       |
| n                                                                                           | 12664                 | 675                           | 1620                 | 7706                    | 201                    | 464                  | 165                 | 1833                | <.0001  |
| Mean (SD)                                                                                   | 90.2 (13.55)          | 92.8 (10.33)                  | 93.2 (10.81)         | 89.3 (14.37)            | 91.2 (10.94)           | 93.8 (11.95)         | 86.9 (14.22)        | 89.6 (13.14)        | .       |
| Median (Q1-Q3)                                                                              | 95.0 (85.0 - 100.0)   | 95.0 (90.0 - 100.0)           | 100.0 (90.0 - 100.0) | 95.0 (81.3 - 100.0)     | 95.0 (85.0 - 100.0)    | 100.0 (90.0 - 100.0) | 90.0 (80.0 - 100.0) | 95.0 (85.0 - 100.0) | .       |



EPIC-26 Baseline (pre-treatment) Results

| Statistic Variable or Category                                                             | TNGR Global (n=13483) | Australia/New Zealand (n=688) | Canada (n=1640) | Central Europe (n=8398) | United Kingdom (n=202) | Italy (n=477) | Spain (n=165) | USA (n=1913) | P Value |
|--------------------------------------------------------------------------------------------|-----------------------|-------------------------------|-----------------|-------------------------|------------------------|---------------|---------------|--------------|---------|
| No problem                                                                                 | 7499 (58.5%)          | 393 (57.9%)                   | 1024 (63.1%)    | 4519 (57.7%)            | 106 (53.0%)            | 359 (77.0%)   | 129 (78.2%)   | 969 (52.4%)  | <.0001  |
| Very small problem                                                                         | 2492 (19.4%)          | 155 (22.8%)                   | 334 (20.6%)     | 1521 (19.4%)            | 49 (24.5%)             | 57 (12.2%)    | 0 (0.0%)      | 376 (20.3%)  | .       |
| Small problem                                                                              | 1609 (12.6%)          | 77 (11.3%)                    | 174 (10.7%)     | 1034 (13.2%)            | 25 (12.5%)             | 25 (5.4%)     | 7 (4.2%)      | 267 (14.4%)  | .       |
| Moderate problem                                                                           | 889 (6.9%)            | 43 (6.3%)                     | 69 (4.2%)       | 552 (7.0%)              | 17 (8.5%)              | 21 (4.5%)     | 14 (8.5%)     | 173 (9.3%)   | .       |
| Big problem                                                                                | 326 (2.5%)            | 11 (1.6%)                     | 23 (1.4%)       | 204 (2.6%)              | 3 (1.5%)               | 4 (0.9%)      | 15 (9.1%)     | 66 (3.6%)    | .       |
| Missing                                                                                    | 668                   | 9                             | 16              | 568                     | 2                      | 11            |               | 62           | .       |
| How big a problem during the last 4 weeks, if any, has change in body weight been for you? |                       |                               |                 |                         |                        |               |               |              | .       |
| No problem                                                                                 | 10473 (82.0%)         | 576 (84.6%)                   | 1378 (84.9%)    | 6328 (81.2%)            | 163 (83.6%)            | 403 (86.7%)   | 160 (97.0%)   | 1465 (79.2%) | <.0001  |
| Very small problem                                                                         | 1160 (9.1%)           | 63 (9.3%)                     | 145 (8.9%)      | 708 (9.1%)              | 15 (7.7%)              | 31 (6.7%)     | 0 (0.0%)      | 198 (10.7%)  | .       |
| Small problem                                                                              | 649 (5.1%)            | 22 (3.2%)                     | 62 (3.8%)       | 422 (5.4%)              | 13 (6.7%)              | 18 (3.9%)     | 1 (0.6%)      | 111 (6.0%)   | .       |
| Moderate problem                                                                           | 351 (2.7%)            | 17 (2.5%)                     | 25 (1.5%)       | 236 (3.0%)              | 4 (2.1%)               | 11 (2.4%)     | 4 (2.4%)      | 54 (2.9%)    | .       |
| Big problem                                                                                | 136 (1.1%)            | 3 (0.4%)                      | 13 (0.8%)       | 97 (1.2%)               | 0 (0.0%)               | 2 (0.4%)      | 0 (0.0%)      | 21 (1.1%)    | .       |
| Missing                                                                                    | 714                   | 7                             | 17              | 607                     | 7                      | 12            |               | 64           | .       |

EPIC-26 results - Radical Prostatectomy

| Statistic Variable or Category                                                                         | Radical Prostatectomy (n=11094) | Australia/New Zealand (n=340) | Canada (n=794)       | Central Europe (n=7754) | United Kingdom (n=72) | Italy (n=414)        | Spain (n=77)          | USA (n=1643)         | P Value |
|--------------------------------------------------------------------------------------------------------|---------------------------------|-------------------------------|----------------------|-------------------------|-----------------------|----------------------|-----------------------|----------------------|---------|
| Urinary Incontinence                                                                                   |                                 |                               |                      |                         |                       |                      |                       |                      | .       |
| n                                                                                                      | 10570                           | 330                           | 762                  | 7318                    | 69                    | 414                  | 77                    | 1600                 | <.0001  |
| Mean (SD)                                                                                              | 93.0 (13.72)                    | 93.0 (13.04)                  | 93.8 (12.67)         | 93.3 (13.44)            | 97.1 (7.37)           | 91.4 (17.06)         | 94.2 (14.83)          | 91.4 (14.65)         | .       |
| Median (Q1-Q3)                                                                                         | 100.0 (91.8 - 100.0)            | 100.0 (91.8 - 100.0)          | 100.0 (93.8 - 100.0) | 100.0 (91.8 - 100.0)    | 100.0 (100.0 - 100.0) | 100.0 (91.8 - 100.0) | 100.0 (100.0 - 100.0) | 100.0 (85.5 - 100.0) | .       |
| Min, Max                                                                                               | 0.0, 100.0                      | 39.5, 100.0                   | 6.3, 100.0           | 0.0, 100.0              | 66.8, 100.0           | 0.0, 100.0           | 33.3, 100.0           | 14.5, 100.0          | .       |
| Over the past 4 weeks, how often have you leaked urine?                                                |                                 |                               |                      |                         |                       |                      |                       |                      | .       |
| More than once a day                                                                                   | 395 (3.6%)                      | 20 (5.9%)                     | 29 (3.7%)            | 248 (3.2%)              | 1 (1.4%)              | 13 (3.1%)            | 1 (1.3%)              | 83 (5.1%)            | <.0001  |
| About once a day                                                                                       | 376 (3.4%)                      | 15 (4.5%)                     | 29 (3.7%)            | 214 (2.8%)              | 2 (2.8%)              | 22 (5.3%)            | 1 (1.3%)              | 93 (5.7%)            | .       |
| More than once a week                                                                                  | 317 (2.9%)                      | 11 (3.3%)                     | 25 (3.2%)            | 182 (2.4%)              | 0 (0.0%)              | 15 (3.6%)            | 7 (9.1%)              | 77 (4.7%)            | .       |
| About once a week                                                                                      | 403 (3.7%)                      | 16 (4.7%)                     | 43 (5.5%)            | 222 (2.9%)              | 5 (6.9%)              | 21 (5.1%)            | 0 (0.0%)              | 96 (5.9%)            | .       |
| Rarely or never                                                                                        | 9477 (86.4%)                    | 275 (81.6%)                   | 658 (83.9%)          | 6787 (88.7%)            | 64 (88.9%)            | 343 (82.9%)          | 68 (88.3%)            | 1282 (78.6%)         | .       |
| Missing                                                                                                | 126                             | 3                             | 10                   | 101                     |                       |                      |                       | 12                   | .       |
| Which of the following best describes your urinary control during the last 4 weeks?                    |                                 |                               |                      |                         |                       |                      |                       |                      | .       |
| No urinary control whatsoever                                                                          | 185 (1.7%)                      | 1 (0.3%)                      | 10 (1.3%)            | 147 (1.9%)              | 0 (0.0%)              | 13 (3.1%)            | 0 (0.0%)              | 14 (0.9%)            | <.0001  |
| Frequent dribbling                                                                                     | 274 (2.5%)                      | 5 (1.5%)                      | 14 (1.8%)            | 188 (2.5%)              | 0 (0.0%)              | 24 (5.8%)            | 5 (6.5%)              | 38 (2.3%)            | .       |
| Occasional dribbling                                                                                   | 2421 (22.0%)                    | 78 (23.1%)                    | 145 (18.4%)          | 1678 (21.9%)            | 10 (13.9%)            | 59 (14.3%)           | 5 (6.5%)              | 446 (27.3%)          | .       |
| Total control                                                                                          | 8111 (73.8%)                    | 254 (75.1%)                   | 618 (78.5%)          | 5655 (73.7%)            | 62 (86.1%)            | 318 (76.8%)          | 67 (87.0%)            | 1137 (69.5%)         | .       |
| Missing                                                                                                | 103                             | 2                             | 7                    | 86                      |                       |                      |                       | 8                    | .       |
| How many pads or adult diapers per day did you usually use to control leakage during the last 4 weeks? |                                 |                               |                      |                         |                       |                      |                       |                      | .       |
| None                                                                                                   | 10678 (97.1%)                   | 333 (98.8%)                   | 762 (98.4%)          | 7436 (96.7%)            | 69 (100.0%)           | 389 (94.0%)          | 77 (100.0%)           | 1612 (98.6%)         | <.0001  |
| 1 pad per day                                                                                          | 237 (2.2%)                      | 4 (1.2%)                      | 10 (1.3%)            | 195 (2.5%)              | 0 (0.0%)              | 11 (2.7%)            | 0 (0.0%)              | 17 (1.0%)            | .       |
| 2 pads per day                                                                                         | 52 (0.5%)                       | 0 (0.0%)                      | 1 (0.1%)             | 39 (0.5%)               | 0 (0.0%)              | 9 (2.2%)             | 0 (0.0%)              | 3 (0.2%)             | .       |
| 3 or more pads per day                                                                                 | 30 (0.3%)                       | 0 (0.0%)                      | 1 (0.1%)             | 21 (0.3%)               | 0 (0.0%)              | 5 (1.2%)             | 0 (0.0%)              | 3 (0.2%)             | .       |
| Missing                                                                                                | 97                              | 3                             | 20                   | 63                      | 3                     |                      |                       | 8                    | .       |

EPIC-26 results - Radical Prostatectomy

| Statistic Variable or Category                                                                    | Radical Prostatectomy (n=11094) | Australia/New Zealand (n=340) | Canada (n=794)      | Central Europe (n=7754) | United Kingdom (n=72) | Italy (n=414)       | Spain (n=77)         | USA (n=1643)        | P Value |
|---------------------------------------------------------------------------------------------------|---------------------------------|-------------------------------|---------------------|-------------------------|-----------------------|---------------------|----------------------|---------------------|---------|
| How big a problem, if any, has dripping or leaking urine been for you during the last 4 weeks?    |                                 |                               |                     |                         |                       |                     |                      |                     |         |
| No problem                                                                                        | 8428 (78.5%)                    | 256 (76.4%)                   | 623 (79.1%)         | 5922 (79.5%)            | 63 (87.5%)            | 319 (77.1%)         | 65 (84.4%)           | 1180 (73.3%)        | <.0001  |
| Very small problem                                                                                | 1552 (14.4%)                    | 62 (18.5%)                    | 126 (16.0%)         | 995 (13.4%)             | 7 (9.7%)              | 59 (14.3%)          | 0 (0.0%)             | 303 (18.8%)         | .       |
| Small problem                                                                                     | 483 (4.5%)                      | 12 (3.6%)                     | 28 (3.6%)           | 322 (4.3%)              | 1 (1.4%)              | 25 (6.0%)           | 6 (7.8%)             | 89 (5.5%)           | .       |
| Moderate problem                                                                                  | 216 (2.0%)                      | 5 (1.5%)                      | 9 (1.1%)            | 156 (2.1%)              | 1 (1.4%)              | 8 (1.9%)            | 5 (6.5%)             | 32 (2.0%)           | .       |
| Big problem                                                                                       | 62 (0.6%)                       | 0 (0.0%)                      | 2 (0.3%)            | 51 (0.7%)               | 0 (0.0%)              | 3 (0.7%)            | 1 (1.3%)             | 5 (0.3%)            | .       |
| Missing                                                                                           | 353                             | 5                             | 6                   | 308                     |                       |                     |                      | 34                  | .       |
| Urinary Irritative/Obst.                                                                          |                                 |                               |                     |                         |                       |                     |                      |                     |         |
| n                                                                                                 | 10502                           | 319                           | 787                 | 7254                    | 69                    | 414                 | 77                   | 1582                | 0.0011  |
| Mean (SD)                                                                                         | 85.8 (15.62)                    | 85.3 (15.90)                  | 86.5 (15.07)        | 86.0 (15.55)            | 85.8 (12.12)          | 84.0 (17.63)        | 89.0 (15.70)         | 84.8 (15.70)        | .       |
| Median (Q1-Q3)                                                                                    | 87.5 (75.0 - 100.0)             | 87.5 (81.3 - 100.0)           | 93.8 (75.0 - 100.0) | 87.5 (75.0 - 100.0)     | 87.5 (75.0 - 93.8)    | 87.5 (75.0 - 100.0) | 100.0 (87.5 - 100.0) | 87.5 (75.0 - 100.0) | .       |
| Min, Max                                                                                          | 0.0, 100.0                      | 12.5, 100.0                   | 12.5, 100.0         | 0.0, 100.0              | 56.3, 100.0           | 18.8, 100.0         | 25.0, 100.0          | 6.3, 100.0          | .       |
| How big a problem, if any, has pain or burning on urination been for you during the last 4 weeks? |                                 |                               |                     |                         |                       |                     |                      |                     |         |
| No problem                                                                                        | 9300 (86.9%)                    | 290 (86.6%)                   | 688 (87.0%)         | 6490 (87.5%)            | 61 (85.9%)            | 310 (74.9%)         | 68 (88.3%)           | 1393 (86.8%)        | <.0001  |
| Very small problem                                                                                | 829 (7.7%)                      | 32 (9.6%)                     | 71 (9.0%)           | 537 (7.2%)              | 6 (8.5%)              | 69 (16.7%)          | 0 (0.0%)             | 114 (7.1%)          | .       |
| Small problem                                                                                     | 317 (3.0%)                      | 5 (1.5%)                      | 17 (2.1%)           | 200 (2.7%)              | 3 (4.2%)              | 21 (5.1%)           | 7 (9.1%)             | 64 (4.0%)           | .       |
| Moderate problem                                                                                  | 186 (1.7%)                      | 7 (2.1%)                      | 10 (1.3%)           | 128 (1.7%)              | 0 (0.0%)              | 12 (2.9%)           | 1 (1.3%)             | 28 (1.7%)           | .       |
| Big problem                                                                                       | 75 (0.7%)                       | 1 (0.3%)                      | 5 (0.6%)            | 60 (0.8%)               | 1 (1.4%)              | 2 (0.5%)            | 1 (1.3%)             | 5 (0.3%)            | .       |
| Missing                                                                                           | 387                             | 5                             | 3                   | 339                     | 1                     |                     |                      | 39                  | .       |
| How big a problem, if any, has bleeding with urination been for you during the last 4 weeks?      |                                 |                               |                     |                         |                       |                     |                      |                     |         |
| No problem                                                                                        | 10059 (94.5%)                   | 302 (89.6%)                   | 732 (92.4%)         | 7023 (95.4%)            | 64 (91.4%)            | 382 (92.3%)         | 77 (100.0%)          | 1479 (92.4%)        | <.0001  |
| Very small problem                                                                                | 352 (3.3%)                      | 24 (7.1%)                     | 45 (5.7%)           | 184 (2.5%)              | 5 (7.1%)              | 14 (3.4%)           | 0 (0.0%)             | 80 (5.0%)           | .       |
| Small problem                                                                                     | 144 (1.4%)                      | 8 (2.4%)                      | 8 (1.0%)            | 89 (1.2%)               | 1 (1.4%)              | 11 (2.7%)           | 0 (0.0%)             | 27 (1.7%)           | .       |
| Moderate problem                                                                                  | 70 (0.7%)                       | 3 (0.9%)                      | 7 (0.9%)            | 45 (0.6%)               | 0 (0.0%)              | 4 (1.0%)            | 0 (0.0%)             | 11 (0.7%)           | .       |
| Big problem                                                                                       | 25 (0.2%)                       | 0 (0.0%)                      | 0 (0.0%)            | 19 (0.3%)               | 0 (0.0%)              | 3 (0.7%)            | 0 (0.0%)             | 3 (0.2%)            | .       |

EPIC-26 results - Radical Prostatectomy

| Statistic Variable or Category                                                                                 | Radical Prostatectomy (n=11094) | Australia/New Zealand (n=340) | Canada (n=794) | Central Europe (n=7754) | United Kingdom (n=72) | Italy (n=414) | Spain (n=77) | USA (n=1643) | P Value |
|----------------------------------------------------------------------------------------------------------------|---------------------------------|-------------------------------|----------------|-------------------------|-----------------------|---------------|--------------|--------------|---------|
| Missing                                                                                                        | 444                             | 3                             | 2              | 394                     | 2                     |               |              | 43           | .       |
| How big a problem, if any, has weak urine stream been for you during the last 4 weeks?                         |                                 |                               |                |                         |                       |               |              |              | .       |
| No problem                                                                                                     | 5172 (47.9%)                    | 153 (45.8%)                   | 397 (50.4%)    | 3567 (47.5%)            | 32 (45.7%)            | 211 (51.0%)   | 47 (61.0%)   | 765 (47.5%)  | 0.0023  |
| Very small problem                                                                                             | 2643 (24.5%)                    | 95 (28.4%)                    | 189 (24.0%)    | 1871 (24.9%)            | 18 (25.7%)            | 89 (21.5%)    | 1 (1.3%)     | 380 (23.6%)  | .       |
| Small problem                                                                                                  | 1604 (14.9%)                    | 43 (12.9%)                    | 128 (16.2%)    | 1106 (14.7%)            | 12 (17.1%)            | 58 (14.0%)    | 18 (23.4%)   | 239 (14.8%)  | .       |
| Moderate problem                                                                                               | 1037 (9.6%)                     | 33 (9.9%)                     | 56 (7.1%)      | 718 (9.6%)              | 8 (11.4%)             | 47 (11.4%)    | 9 (11.7%)    | 166 (10.3%)  | .       |
| Big problem                                                                                                    | 342 (3.2%)                      | 10 (3.0%)                     | 18 (2.3%)      | 243 (3.2%)              | 0 (0.0%)              | 9 (2.2%)      | 2 (2.6%)     | 60 (3.7%)    | .       |
| Missing                                                                                                        | 296                             | 6                             | 6              | 249                     | 2                     |               |              | 33           | .       |
| How big a problem, if any, has need to urinate frequently during the day been for you during the last 4 weeks? |                                 |                               |                |                         |                       |               |              |              | .       |
| No problem                                                                                                     | 4930 (45.4%)                    | 149 (45.6%)                   | 373 (47.2%)    | 3495 (46.3%)            | 28 (38.9%)            | 185 (44.7%)   | 59 (76.6%)   | 641 (39.6%)  | <.0001  |
| Very small problem                                                                                             | 2439 (22.5%)                    | 76 (23.2%)                    | 188 (23.8%)    | 1659 (22.0%)            | 20 (27.8%)            | 88 (21.3%)    | 1 (1.3%)     | 407 (25.1%)  | .       |
| Small problem                                                                                                  | 1736 (16.0%)                    | 50 (15.3%)                    | 114 (14.4%)    | 1201 (15.9%)            | 15 (20.8%)            | 64 (15.5%)    | 10 (13.0%)   | 282 (17.4%)  | .       |
| Moderate problem                                                                                               | 1334 (12.3%)                    | 43 (13.1%)                    | 95 (12.0%)     | 895 (11.9%)             | 9 (12.5%)             | 62 (15.0%)    | 6 (7.8%)     | 224 (13.8%)  | .       |
| Big problem                                                                                                    | 411 (3.8%)                      | 9 (2.8%)                      | 21 (2.7%)      | 300 (4.0%)              | 0 (0.0%)              | 15 (3.6%)     | 1 (1.3%)     | 65 (4.0%)    | .       |
| Missing                                                                                                        | 244                             | 13                            | 3              | 204                     |                       |               |              | 24           | .       |
| Overall how big a problem has your urinary function been for you during the last 4 weeks?                      |                                 |                               |                |                         |                       |               |              |              | .       |
| No problem                                                                                                     | 6351 (58.3%)                    | 178 (52.5%)                   | 460 (58.3%)    | 4578 (60.5%)            | 37 (51.4%)            | 210 (50.7%)   | 47 (61.0%)   | 841 (51.4%)  | <.0001  |
| Very small problem                                                                                             | 2266 (20.8%)                    | 98 (28.9%)                    | 175 (22.2%)    | 1465 (19.4%)            | 18 (25.0%)            | 94 (22.7%)    | 1 (1.3%)     | 415 (25.4%)  | .       |
| Small problem                                                                                                  | 1177 (10.8%)                    | 33 (9.7%)                     | 86 (10.9%)     | 764 (10.1%)             | 11 (15.3%)            | 55 (13.3%)    | 17 (22.1%)   | 211 (12.9%)  | .       |
| Moderate problem                                                                                               | 855 (7.9%)                      | 27 (8.0%)                     | 55 (7.0%)      | 579 (7.7%)              | 6 (8.3%)              | 48 (11.6%)    | 10 (13.0%)   | 130 (8.0%)   | .       |
| Big problem                                                                                                    | 242 (2.2%)                      | 3 (0.9%)                      | 13 (1.6%)      | 179 (2.4%)              | 0 (0.0%)              | 7 (1.7%)      | 2 (2.6%)     | 38 (2.3%)    | .       |
| Missing                                                                                                        | 203                             | 1                             | 5              | 189                     |                       |               |              | 8            | .       |
| Bowel                                                                                                          |                                 |                               |                |                         |                       |               |              |              | .       |
| n                                                                                                              | 10590                           | 336                           | 791            | 7288                    | 69                    | 414           | 77           | 1615         | <.0001  |
| Mean (SD)                                                                                                      | 95.5 (9.84)                     | 93.6 (11.31)                  | 94.9 (10.69)   | 96.0 (9.29)             | 94.8 (11.15)          | 93.4 (11.50)  | 98.4 (5.70)  | 94.4 (10.84) | .       |



EPIC-26 results - Radical Prostatectomy

| Statistic Variable or Category                                                          | Radical Prostatectomy (n=11094) | Australia/New Zealand (n=340) | Canada (n=794)     | Central Europe (n=7754) | United Kingdom (n=72) | Italy (n=414)      | Spain (n=77)       | USA (n=1643)       | P Value |
|-----------------------------------------------------------------------------------------|---------------------------------|-------------------------------|--------------------|-------------------------|-----------------------|--------------------|--------------------|--------------------|---------|
| No problem                                                                              | 10261 (96.8%)                   | 323 (95.8%)                   | 754 (95.2%)        | 7104 (97.4%)            | 68 (98.6%)            | 395 (95.4%)        | 74 (96.1%)         | 1543 (95.5%)       | 0.0056  |
| Very small problem                                                                      | 234 (2.2%)                      | 13 (3.9%)                     | 28 (3.5%)          | 128 (1.8%)              | 1 (1.4%)              | 11 (2.7%)          | 1 (1.3%)           | 52 (3.2%)          | .       |
| Small problem                                                                           | 76 (0.7%)                       | 1 (0.3%)                      | 6 (0.8%)           | 47 (0.6%)               | 0 (0.0%)              | 7 (1.7%)           | 2 (2.6%)           | 13 (0.8%)          | .       |
| Moderate problem                                                                        | 24 (0.2%)                       | 0 (0.0%)                      | 3 (0.4%)           | 13 (0.2%)               | 0 (0.0%)              | 1 (0.2%)           | 0 (0.0%)           | 7 (0.4%)           | .       |
| Big problem                                                                             | 5 (0.0%)                        | 0 (0.0%)                      | 1 (0.1%)           | 3 (0.0%)                | 0 (0.0%)              | 0 (0.0%)           | 0 (0.0%)           | 1 (0.1%)           | .       |
| Missing                                                                                 | 494                             | 3                             | 2                  | 459                     | 3                     |                    |                    | 27                 | .       |
| How big a problem, if any, has abdominal/pelvic/rectal pain been for you?               |                                 |                               |                    |                         |                       |                    |                    |                    | .       |
| No problem                                                                              | 8998 (84.7%)                    | 273 (81.5%)                   | 654 (82.6%)        | 6274 (85.6%)            | 54 (77.1%)            | 329 (79.5%)        | 73 (94.8%)         | 1341 (83.2%)       | 0.0040  |
| Very small problem                                                                      | 943 (8.9%)                      | 41 (12.2%)                    | 87 (11.0%)         | 605 (8.3%)              | 6 (8.6%)              | 47 (11.4%)         | 0 (0.0%)           | 157 (9.7%)         | .       |
| Small problem                                                                           | 391 (3.7%)                      | 13 (3.9%)                     | 27 (3.4%)          | 262 (3.6%)              | 6 (8.6%)              | 22 (5.3%)          | 1 (1.3%)           | 60 (3.7%)          | .       |
| Moderate problem                                                                        | 229 (2.2%)                      | 6 (1.8%)                      | 18 (2.3%)          | 145 (2.0%)              | 3 (4.3%)              | 13 (3.1%)          | 3 (3.9%)           | 41 (2.5%)          | .       |
| Big problem                                                                             | 65 (0.6%)                       | 2 (0.6%)                      | 6 (0.8%)           | 40 (0.5%)               | 1 (1.4%)              | 3 (0.7%)           | 0 (0.0%)           | 13 (0.8%)          | .       |
| Missing                                                                                 | 468                             | 5                             | 2                  | 428                     | 2                     |                    |                    | 31                 | .       |
| Overall, how big a problem have your bowel habits been for you during the last 4 weeks? |                                 |                               |                    |                         |                       |                    |                    |                    | .       |
| No problem                                                                              | 9230 (84.0%)                    | 260 (77.6%)                   | 652 (82.5%)        | 6586 (85.9%)            | 61 (84.7%)            | 309 (74.6%)        | 72 (93.5%)         | 1290 (78.9%)       | <.0001  |
| Very small problem                                                                      | 1069 (9.7%)                     | 51 (15.2%)                    | 94 (11.9%)         | 634 (8.3%)              | 8 (11.1%)             | 49 (11.8%)         | 0 (0.0%)           | 233 (14.3%)        | .       |
| Small problem                                                                           | 397 (3.6%)                      | 10 (3.0%)                     | 27 (3.4%)          | 249 (3.2%)              | 1 (1.4%)              | 35 (8.5%)          | 2 (2.6%)           | 73 (4.5%)          | .       |
| Moderate problem                                                                        | 220 (2.0%)                      | 12 (3.6%)                     | 14 (1.8%)          | 140 (1.8%)              | 2 (2.8%)              | 17 (4.1%)          | 3 (3.9%)           | 32 (2.0%)          | .       |
| Big problem                                                                             | 70 (0.6%)                       | 2 (0.6%)                      | 3 (0.4%)           | 55 (0.7%)               | 0 (0.0%)              | 4 (1.0%)           | 0 (0.0%)           | 6 (0.4%)           | .       |
| Missing                                                                                 | 108                             | 5                             | 4                  | 90                      |                       |                    |                    | 9                  | .       |
| Sexual                                                                                  |                                 |                               |                    |                         |                       |                    |                    |                    | .       |
| n                                                                                       | 10341                           | 327                           | 779                | 7106                    | 68                    | 414                | 77                 | 1570               | <.0001  |
| Mean (SD)                                                                               | 62.8 (29.04)                    | 67.2 (27.68)                  | 68.0 (26.58)       | 62.1 (28.95)            | 63.3 (32.29)          | 54.4 (26.78)       | 74.4 (21.56)       | 64.2 (30.82)       | .       |
| Median (Q1-Q3)                                                                          | 66.7 (40.3 - 87.5)              | 75.0 (44.5 - 87.5)            | 75.0 (48.7 - 87.5) | 66.7 (38.8 - 87.5)      | 70.8 (30.5 - 89.6)    | 58.3 (34.7 - 75.0) | 83.3 (66.7 - 87.5) | 70.8 (40.3 - 91.7) | .       |
| Min, Max                                                                                | 0.0, 100.0                      | 0.0, 100.0                    | 0.0, 100.0         | 0.0, 100.0              | 0.0, 100.0            | 0.0, 100.0         | 9.7, 100.0         | 0.0, 100.0         | .       |



EPIC-26 results - Radical Prostatectomy

| Statistic Variable or Category                                                      | Radical Prostatectomy (n=11094) | Australia/New Zealand (n=340) | Canada (n=794) | Central Europe (n=7754) | United Kingdom (n=72) | Italy (n=414) | Spain (n=77) | USA (n=1643) | P Value |
|-------------------------------------------------------------------------------------|---------------------------------|-------------------------------|----------------|-------------------------|-----------------------|---------------|--------------|--------------|---------|
| How would you rate your ability to have an erection during the last 4 weeks?        |                                 |                               |                |                         |                       |               |              |              | .       |
| Very poor to none                                                                   | 1390 (13.2%)                    | 33 (9.9%)                     | 65 (8.3%)      | 957 (13.1%)             | 16 (22.5%)            | 74 (17.9%)    | 5 (6.5%)     | 240 (15.0%)  | <.0001  |
| Poor                                                                                | 1528 (14.5%)                    | 48 (14.4%)                    | 109 (13.9%)    | 1053 (14.4%)            | 8 (11.3%)             | 89 (21.5%)    | 4 (5.2%)     | 217 (13.6%)  | .       |
| Fair                                                                                | 2665 (25.2%)                    | 69 (20.7%)                    | 182 (23.3%)    | 1914 (26.2%)            | 12 (16.9%)            | 126 (30.4%)   | 10 (13.0%)   | 352 (22.1%)  | .       |
| Good                                                                                | 3197 (30.3%)                    | 108 (32.3%)                   | 282 (36.1%)    | 2227 (30.5%)            | 20 (28.2%)            | 94 (22.7%)    | 55 (71.4%)   | 411 (25.8%)  | .       |
| Very good                                                                           | 1788 (16.9%)                    | 76 (22.8%)                    | 144 (18.4%)    | 1143 (15.7%)            | 15 (21.1%)            | 31 (7.5%)     | 3 (3.9%)     | 376 (23.6%)  | .       |
| Missing                                                                             | 526                             | 6                             | 12             | 460                     | 1                     |               |              | 47           | .       |
| How would you rate your ability to reach orgasm (climax) during the last 4 weeks?   |                                 |                               |                |                         |                       |               |              |              | .       |
| Very poor to none                                                                   | 1294 (12.5%)                    | 37 (11.3%)                    | 71 (9.1%)      | 881 (12.3%)             | 13 (18.6%)            | 71 (17.1%)    | 7 (9.1%)     | 214 (13.6%)  | <.0001  |
| Poor                                                                                | 1261 (12.1%)                    | 42 (12.8%)                    | 74 (9.5%)      | 899 (12.6%)             | 7 (10.0%)             | 68 (16.4%)    | 2 (2.6%)     | 169 (10.8%)  | .       |
| Fair                                                                                | 2291 (22.1%)                    | 62 (18.9%)                    | 161 (20.6%)    | 1646 (23.0%)            | 16 (22.9%)            | 131 (31.6%)   | 4 (5.2%)     | 271 (17.3%)  | .       |
| Good                                                                                | 3512 (33.8%)                    | 111 (33.8%)                   | 292 (37.4%)    | 2475 (34.6%)            | 19 (27.1%)            | 107 (25.8%)   | 62 (80.5%)   | 446 (28.4%)  | .       |
| Very good                                                                           | 2031 (19.5%)                    | 76 (23.2%)                    | 182 (23.3%)    | 1251 (17.5%)            | 15 (21.4%)            | 37 (8.9%)     | 2 (2.6%)     | 468 (29.8%)  | .       |
| Missing                                                                             | 705                             | 12                            | 14             | 602                     | 2                     |               |              | 75           | .       |
| How would you describe the usual quality of your erections during the last 4 weeks? |                                 |                               |                |                         |                       |               |              |              | .       |
| None at all                                                                         | 1440 (13.7%)                    | 29 (8.7%)                     | 53 (6.8%)      | 1086 (15.0%)            | 11 (15.5%)            | 62 (15.0%)    | 4 (5.2%)     | 195 (12.3%)  | <.0001  |
| Not firm enough for any sexual activity                                             | 1332 (12.7%)                    | 35 (10.5%)                    | 101 (12.9%)    | 929 (12.9%)             | 9 (12.7%)             | 67 (16.2%)    | 2 (2.6%)     | 189 (11.9%)  | .       |
| Firm enough for masturbation and foreplay                                           | 1966 (18.8%)                    | 66 (19.9%)                    | 150 (19.2%)    | 1388 (19.2%)            | 13 (18.3%)            | 66 (15.9%)    | 6 (7.8%)     | 277 (17.5%)  | .       |
| Firm enough for intercourse                                                         | 5737 (54.8%)                    | 202 (60.8%)                   | 477 (61.1%)    | 3813 (52.8%)            | 38 (53.5%)            | 219 (52.9%)   | 65 (84.4%)   | 923 (58.3%)  | .       |
| Missing                                                                             | 619                             | 8                             | 13             | 538                     | 1                     |               |              | 59           | .       |
| How would you describe the frequency of your erections during the last 4 weeks?     |                                 |                               |                |                         |                       |               |              |              | .       |
| I never had an erection when I wanted one                                           | 1484 (14.5%)                    | 27 (8.3%)                     | 64 (8.3%)      | 1073 (15.3%)            | 12 (17.1%)            | 67 (16.2%)    | 9 (11.7%)    | 232 (14.8%)  | <.0001  |

EPIC-26 results - Radical Prostatectomy

| Statistic Variable or Category                                                              | Radical Prostatectomy (n=11094) | Australia/New Zealand (n=340) | Canada (n=794)       | Central Europe (n=7754) | United Kingdom (n=72) | Italy (n=414)        | Spain (n=77)        | USA (n=1643)        | P Value |
|---------------------------------------------------------------------------------------------|---------------------------------|-------------------------------|----------------------|-------------------------|-----------------------|----------------------|---------------------|---------------------|---------|
| I had an erection less than half the time I wanted one                                      | 1452 (14.2%)                    | 42 (12.8%)                    | 101 (13.0%)          | 1049 (15.0%)            | 9 (12.9%)             | 66 (15.9%)           | 1 (1.3%)            | 184 (11.7%)         | .       |
| I had an erection about half the time I wanted one                                          | 1502 (14.7%)                    | 41 (12.5%)                    | 113 (14.6%)          | 1036 (14.8%)            | 6 (8.6%)              | 123 (29.7%)          | 5 (6.5%)            | 178 (11.3%)         | .       |
| I had an erection more than half the time I wanted one                                      | 1693 (16.5%)                    | 65 (19.9%)                    | 124 (16.0%)          | 1116 (15.9%)            | 12 (17.1%)            | 83 (20.0%)           | 4 (5.2%)            | 289 (18.4%)         | .       |
| I had an erection whenever I wanted one                                                     | 4113 (40.2%)                    | 152 (46.5%)                   | 372 (48.1%)          | 2736 (39.0%)            | 31 (44.3%)            | 75 (18.1%)           | 58 (75.3%)          | 689 (43.8%)         | .       |
| Missing                                                                                     | 850                             | 13                            | 20                   | 744                     | 2                     |                      |                     | 71                  | .       |
| Overall, how would you rate your ability to function sexually during the last 4 weeks?      |                                 |                               |                      |                         |                       |                      |                     |                     | .       |
| Very poor                                                                                   | 1504 (14.4%)                    | 45 (13.7%)                    | 75 (9.6%)            | 998 (13.9%)             | 13 (19.1%)            | 93 (22.5%)           | 10 (13.0%)          | 270 (17.1%)         | <.0001  |
| Poor                                                                                        | 1596 (15.3%)                    | 42 (12.8%)                    | 119 (15.3%)          | 1131 (15.7%)            | 8 (11.8%)             | 80 (19.3%)           | 11 (14.3%)          | 205 (13.0%)         | .       |
| Fair                                                                                        | 2541 (24.3%)                    | 79 (24.0%)                    | 160 (20.5%)          | 1842 (25.6%)            | 13 (19.1%)            | 128 (30.9%)          | 13 (16.9%)          | 306 (19.4%)         | .       |
| Good                                                                                        | 3245 (31.1%)                    | 104 (31.6%)                   | 272 (34.9%)          | 2296 (31.9%)            | 20 (29.4%)            | 88 (21.3%)           | 37 (48.1%)          | 428 (27.1%)         | .       |
| Very good                                                                                   | 1558 (14.9%)                    | 59 (17.9%)                    | 154 (19.7%)          | 928 (12.9%)             | 14 (20.6%)            | 25 (6.0%)            | 6 (7.8%)            | 372 (23.5%)         | .       |
| Missing                                                                                     | 650                             | 11                            | 14                   | 559                     | 4                     |                      |                     | 62                  | .       |
| Overall, how big a problem have your sexual functions been for you during the last 4 weeks? |                                 |                               |                      |                         |                       |                      |                     |                     | .       |
| No problem                                                                                  | 5090 (48.7%)                    | 170 (51.1%)                   | 393 (50.3%)          | 3539 (49.2%)            | 38 (54.3%)            | 180 (43.5%)          | 62 (80.5%)          | 708 (44.7%)         | <.0001  |
| Very small problem                                                                          | 1693 (16.2%)                    | 59 (17.7%)                    | 135 (17.3%)          | 1159 (16.1%)            | 16 (22.9%)            | 79 (19.1%)           | 0 (0.0%)            | 245 (15.5%)         | .       |
| Small problem                                                                               | 1682 (16.1%)                    | 50 (15.0%)                    | 120 (15.3%)          | 1187 (16.5%)            | 5 (7.1%)              | 65 (15.7%)           | 5 (6.5%)            | 250 (15.8%)         | .       |
| Moderate problem                                                                            | 1343 (12.8%)                    | 29 (8.7%)                     | 97 (12.4%)           | 903 (12.6%)             | 5 (7.1%)              | 70 (16.9%)           | 7 (9.1%)            | 232 (14.6%)         | .       |
| Big problem                                                                                 | 645 (6.2%)                      | 25 (7.5%)                     | 37 (4.7%)            | 405 (5.6%)              | 6 (8.6%)              | 20 (4.8%)            | 3 (3.9%)            | 149 (9.4%)          | .       |
| Missing                                                                                     | 641                             | 7                             | 12                   | 561                     | 2                     |                      |                     | 59                  | .       |
| Hormonal                                                                                    |                                 |                               |                      |                         |                       |                      |                     |                     | .       |
| n                                                                                           | 10399                           | 340                           | 782                  | 7131                    | 72                    | 414                  | 77                  | 1583                | <.0001  |
| Mean (SD)                                                                                   | 89.9 (13.81)                    | 93.2 (10.03)                  | 92.3 (11.59)         | 89.3 (14.35)            | 91.9 (10.48)          | 94.0 (11.80)         | 86.2 (13.77)        | 89.4 (13.22)        | .       |
| Median (Q1-Q3)                                                                              | 95.0 (85.0 - 100.0)             | 100.0 (90.0 - 100.0)          | 100.0 (90.0 - 100.0) | 95.0 (81.3 - 100.0)     | 95.0 (90.0 - 100.0)   | 100.0 (90.0 - 100.0) | 85.0 (80.0 - 100.0) | 95.0 (85.0 - 100.0) | .       |



EPIC-26 results - Radical Prostatectomy

| Statistic Variable or Category                                                             | Radical Prostatectomy (n=11094) | Australia/New Zealand (n=340) | Canada (n=794) | Central Europe (n=7754) | United Kingdom (n=72) | Italy (n=414) | Spain (n=77) | USA (n=1643) | P Value |
|--------------------------------------------------------------------------------------------|---------------------------------|-------------------------------|----------------|-------------------------|-----------------------|---------------|--------------|--------------|---------|
| No problem                                                                                 | 6119 (58.2%)                    | 200 (59.0%)                   | 475 (60.5%)    | 4187 (57.9%)            | 42 (58.3%)            | 323 (78.0%)   | 62 (80.5%)   | 830 (52.0%)  | <.0001  |
| Very small problem                                                                         | 2047 (19.5%)                    | 79 (23.3%)                    | 172 (21.9%)    | 1403 (19.4%)            | 15 (20.8%)            | 51 (12.3%)    | 0 (0.0%)     | 327 (20.5%)  | .       |
| Small problem                                                                              | 1325 (12.6%)                    | 32 (9.4%)                     | 87 (11.1%)     | 944 (13.0%)             | 11 (15.3%)            | 21 (5.1%)     | 2 (2.6%)     | 228 (14.3%)  | .       |
| Moderate problem                                                                           | 751 (7.1%)                      | 21 (6.2%)                     | 38 (4.8%)      | 515 (7.1%)              | 3 (4.2%)              | 15 (3.6%)     | 4 (5.2%)     | 155 (9.7%)   | .       |
| Big problem                                                                                | 279 (2.7%)                      | 7 (2.1%)                      | 13 (1.7%)      | 188 (2.6%)              | 1 (1.4%)              | 4 (1.0%)      | 9 (11.7%)    | 57 (3.6%)    | .       |
| Missing                                                                                    | 573                             | 1                             | 9              | 517                     |                       |               |              | 46           | .       |
| How big a problem during the last 4 weeks, if any, has change in body weight been for you? |                                 |                               |                |                         |                       |               |              |              | .       |
| No problem                                                                                 | 8558 (81.6%)                    | 299 (87.9%)                   | 662 (84.3%)    | 5848 (81.2%)            | 61 (87.1%)            | 359 (86.7%)   | 75 (97.4%)   | 1254 (78.7%) | <.0001  |
| Very small problem                                                                         | 959 (9.1%)                      | 23 (6.8%)                     | 72 (9.2%)      | 652 (9.1%)              | 5 (7.1%)              | 29 (7.0%)     | 0 (0.0%)     | 178 (11.2%)  | .       |
| Small problem                                                                              | 547 (5.2%)                      | 8 (2.4%)                      | 31 (3.9%)      | 397 (5.5%)              | 2 (2.9%)              | 14 (3.4%)     | 1 (1.3%)     | 94 (5.9%)    | .       |
| Moderate problem                                                                           | 295 (2.8%)                      | 9 (2.6%)                      | 10 (1.3%)      | 214 (3.0%)              | 2 (2.9%)              | 11 (2.7%)     | 1 (1.3%)     | 48 (3.0%)    | .       |
| Big problem                                                                                | 123 (1.2%)                      | 1 (0.3%)                      | 10 (1.3%)      | 91 (1.3%)               | 0 (0.0%)              | 1 (0.2%)      | 0 (0.0%)     | 20 (1.3%)    | .       |
| Missing                                                                                    | 612                             |                               | 9              | 552                     | 2                     |               |              | 49           | .       |

EPIC-26 results - EBRT

| Statistic Variable or Category                                                                         | EBRT (n=1037)        | Australia/New Zealand (n=104) | Canada (n=354)       | Central Europe (n=439) | United Kingdom (n=53) | Italy (n=24)         | Spain (n=47)          | USA (n=16)          | P Value |
|--------------------------------------------------------------------------------------------------------|----------------------|-------------------------------|----------------------|------------------------|-----------------------|----------------------|-----------------------|---------------------|---------|
| Urinary Incontinence                                                                                   |                      |                               |                      |                        |                       |                      |                       |                     | .       |
| n                                                                                                      | 983                  | 102                           | 344                  | 401                    | 52                    | 21                   | 47                    | 16                  | 0.0448  |
| Mean (SD)                                                                                              | 91.5 (15.85)         | 94.8 (11.43)                  | 91.9 (14.02)         | 91.0 (16.96)           | 91.6 (15.39)          | 94.5 (10.58)         | 90.4 (20.73)          | 76.0 (28.04)        | .       |
| Median (Q1-Q3)                                                                                         | 100.0 (87.5 - 100.0) | 100.0 (100.0 - 100.0)         | 100.0 (85.5 - 100.0) | 100.0 (91.8 - 100.0)   | 100.0 (85.5 - 100.0)  | 100.0 (91.8 - 100.0) | 100.0 (100.0 - 100.0) | 92.8 (50.0 - 100.0) | .       |
| Min, Max                                                                                               | 6.3, 100.0           | 52.0, 100.0                   | 25.0, 100.0          | 6.3, 100.0             | 14.5, 100.0           | 60.5, 100.0          | 33.3, 100.0           | 25.0, 100.0         | .       |
| Over the past 4 weeks, how often have you leaked urine?                                                |                      |                               |                      |                        |                       |                      |                       |                     | .       |
| More than once a day                                                                                   | 63 (6.1%)            | 4 (3.9%)                      | 23 (6.6%)            | 26 (5.9%)              | 2 (3.8%)              | 0 (0.0%)             | 2 (4.3%)              | 6 (37.5%)           | 0.0010  |
| About once a day                                                                                       | 33 (3.2%)            | 4 (3.9%)                      | 8 (2.3%)             | 12 (2.7%)              | 3 (5.7%)              | 1 (4.3%)             | 4 (8.5%)              | 1 (6.3%)            | .       |
| More than once a week                                                                                  | 26 (2.5%)            | 3 (2.9%)                      | 10 (2.8%)            | 9 (2.1%)               | 2 (3.8%)              | 0 (0.0%)             | 2 (4.3%)              | 0 (0.0%)            | .       |
| About once a week                                                                                      | 58 (5.6%)            | 3 (2.9%)                      | 30 (8.5%)            | 21 (4.8%)              | 3 (5.7%)              | 0 (0.0%)             | 1 (2.1%)              | 0 (0.0%)            | .       |
| Rarely or never                                                                                        | 850 (82.5%)          | 89 (86.4%)                    | 280 (79.8%)          | 369 (84.4%)            | 43 (81.1%)            | 22 (95.7%)           | 38 (80.9%)            | 9 (56.3%)           | .       |
| Missing                                                                                                | 7                    | 1                             | 3                    | 2                      |                       | 1                    |                       |                     | .       |
| Which of the following best describes your urinary control during the last 4 weeks?                    |                      |                               |                      |                        |                       |                      |                       |                     | .       |
| No urinary control whatsoever                                                                          | 24 (2.3%)            | 0 (0.0%)                      | 5 (1.4%)             | 16 (3.7%)              | 0 (0.0%)              | 1 (4.3%)             | 0 (0.0%)              | 2 (12.5%)           | 0.0002  |
| Frequent dribbling                                                                                     | 43 (4.2%)            | 1 (1.0%)                      | 13 (3.7%)            | 17 (3.9%)              | 3 (5.8%)              | 0 (0.0%)             | 6 (12.8%)             | 3 (18.8%)           | .       |
| Occasional dribbling                                                                                   | 220 (21.4%)          | 18 (17.5%)                    | 80 (22.9%)           | 98 (22.5%)             | 13 (25.0%)            | 5 (21.7%)            | 3 (6.4%)              | 3 (18.8%)           | .       |
| Total control                                                                                          | 739 (72.0%)          | 84 (81.6%)                    | 252 (72.0%)          | 304 (69.9%)            | 36 (69.2%)            | 17 (73.9%)           | 38 (80.9%)            | 8 (50.0%)           | .       |
| Missing                                                                                                | 11                   | 1                             | 4                    | 4                      | 1                     | 1                    |                       |                     | .       |
| How many pads or adult diapers per day did you usually use to control leakage during the last 4 weeks? |                      |                               |                      |                        |                       |                      |                       |                     | .       |
| None                                                                                                   | 1001 (97.4%)         | 103 (100.0%)                  | 345 (99.1%)          | 416 (95.0%)            | 52 (98.1%)            | 23 (100.0%)          | 47 (100.0%)           | 15 (93.8%)          | 0.1171  |
| 1 pad per day                                                                                          | 19 (1.8%)            | 0 (0.0%)                      | 2 (0.6%)             | 16 (3.7%)              | 0 (0.0%)              | 0 (0.0%)             | 0 (0.0%)              | 1 (6.3%)            | .       |
| 2 pads per day                                                                                         | 4 (0.4%)             | 0 (0.0%)                      | 1 (0.3%)             | 3 (0.7%)               | 0 (0.0%)              | 0 (0.0%)             | 0 (0.0%)              | 0 (0.0%)            | .       |
| 3 or more pads per day                                                                                 | 4 (0.4%)             | 0 (0.0%)                      | 0 (0.0%)             | 3 (0.7%)               | 1 (1.9%)              | 0 (0.0%)             | 0 (0.0%)              | 0 (0.0%)            | .       |
| Missing                                                                                                | 9                    | 1                             | 6                    | 1                      |                       | 1                    |                       |                     | .       |

EPIC-26 results - EBRT

| Statistic Variable or Category                                                                    | EBRT (n=1037)       | Australia/New Zealand (n=104) | Canada (n=354)      | Central Europe (n=439) | United Kingdom (n=53) | Italy (n=24)        | Spain (n=47)        | USA (n=16)          | P Value |
|---------------------------------------------------------------------------------------------------|---------------------|-------------------------------|---------------------|------------------------|-----------------------|---------------------|---------------------|---------------------|---------|
| How big a problem, if any, has dripping or leaking urine been for you during the last 4 weeks?    |                     |                               |                     |                        |                       |                     |                     |                     |         |
| No problem                                                                                        | 750 (75.3%)         | 85 (83.3%)                    | 258 (73.3%)         | 304 (75.1%)            | 37 (69.8%)            | 17 (81.0%)          | 38 (80.9%)          | 11 (68.8%)          | <.0001  |
| Very small problem                                                                                | 163 (16.4%)         | 12 (11.8%)                    | 69 (19.6%)          | 63 (15.6%)             | 15 (28.3%)            | 3 (14.3%)           | 0 (0.0%)            | 1 (6.3%)            | .       |
| Small problem                                                                                     | 46 (4.6%)           | 5 (4.9%)                      | 15 (4.3%)           | 21 (5.2%)              | 0 (0.0%)              | 1 (4.8%)            | 3 (6.4%)            | 1 (6.3%)            | .       |
| Moderate problem                                                                                  | 29 (2.9%)           | 0 (0.0%)                      | 9 (2.6%)            | 14 (3.5%)              | 1 (1.9%)              | 0 (0.0%)            | 3 (6.4%)            | 2 (12.5%)           | .       |
| Big problem                                                                                       | 8 (0.8%)            | 0 (0.0%)                      | 1 (0.3%)            | 3 (0.7%)               | 0 (0.0%)              | 0 (0.0%)            | 3 (6.4%)            | 1 (6.3%)            | .       |
| Missing                                                                                           | 41                  | 2                             | 2                   | 34                     |                       | 3                   |                     |                     | .       |
| Urinary Irritative/Obst.                                                                          |                     |                               |                     |                        |                       |                     |                     |                     |         |
| n                                                                                                 | 975                 | 101                           | 351                 | 390                    | 52                    | 20                  | 47                  | 14                  | 0.1532  |
| Mean (SD)                                                                                         | 86.6 (15.14)        | 86.6 (13.75)                  | 86.8 (14.67)        | 86.5 (16.10)           | 83.2 (15.03)          | 92.8 (9.13)         | 88.3 (13.27)        | 81.3 (19.76)        | .       |
| Median (Q1-Q3)                                                                                    | 87.5 (81.3 - 100.0) | 93.8 (81.3 - 100.0)           | 93.8 (81.3 - 100.0) | 93.8 (81.3 - 100.0)    | 87.5 (75.0 - 93.8)    | 93.8 (87.5 - 100.0) | 87.5 (81.3 - 100.0) | 90.6 (62.5 - 100.0) | .       |
| Min, Max                                                                                          | 18.8, 100.0         | 43.8, 100.0                   | 25.0, 100.0         | 18.8, 100.0            | 31.3, 100.0           | 68.8, 100.0         | 50.0, 100.0         | 37.5, 100.0         | .       |
| How big a problem, if any, has pain or burning on urination been for you during the last 4 weeks? |                     |                               |                     |                        |                       |                     |                     |                     |         |
| No problem                                                                                        | 862 (86.6%)         | 89 (87.3%)                    | 313 (88.9%)         | 344 (84.5%)            | 47 (88.7%)            | 19 (95.0%)          | 38 (80.9%)          | 12 (85.7%)          | 0.0013  |
| Very small problem                                                                                | 77 (7.7%)           | 11 (10.8%)                    | 30 (8.5%)           | 30 (7.4%)              | 4 (7.5%)              | 1 (5.0%)            | 1 (2.1%)            | 0 (0.0%)            | .       |
| Small problem                                                                                     | 30 (3.0%)           | 1 (1.0%)                      | 3 (0.9%)            | 18 (4.4%)              | 0 (0.0%)              | 0 (0.0%)            | 7 (14.9%)           | 1 (7.1%)            | .       |
| Moderate problem                                                                                  | 17 (1.7%)           | 1 (1.0%)                      | 3 (0.9%)            | 9 (2.2%)               | 2 (3.8%)              | 0 (0.0%)            | 1 (2.1%)            | 1 (7.1%)            | .       |
| Big problem                                                                                       | 9 (0.9%)            | 0 (0.0%)                      | 3 (0.9%)            | 6 (1.5%)               | 0 (0.0%)              | 0 (0.0%)            | 0 (0.0%)            | 0 (0.0%)            | .       |
| Missing                                                                                           | 42                  | 2                             | 2                   | 32                     |                       | 4                   |                     | 2                   | .       |
| How big a problem, if any, has bleeding with urination been for you during the last 4 weeks?      |                     |                               |                     |                        |                       |                     |                     |                     |         |
| No problem                                                                                        | 916 (93.3%)         | 93 (92.1%)                    | 326 (92.9%)         | 366 (92.2%)            | 51 (98.1%)            | 20 (100.0%)         | 47 (100.0%)         | 13 (92.9%)          | 0.6380  |
| Very small problem                                                                                | 39 (4.0%)           | 6 (5.9%)                      | 18 (5.1%)           | 15 (3.8%)              | 0 (0.0%)              | 0 (0.0%)            | 0 (0.0%)            | 0 (0.0%)            | .       |
| Small problem                                                                                     | 13 (1.3%)           | 2 (2.0%)                      | 3 (0.9%)            | 7 (1.8%)               | 0 (0.0%)              | 0 (0.0%)            | 0 (0.0%)            | 1 (7.1%)            | .       |
| Moderate problem                                                                                  | 12 (1.2%)           | 0 (0.0%)                      | 4 (1.1%)            | 7 (1.8%)               | 1 (1.9%)              | 0 (0.0%)            | 0 (0.0%)            | 0 (0.0%)            | .       |
| Big problem                                                                                       | 2 (0.2%)            | 0 (0.0%)                      | 0 (0.0%)            | 2 (0.5%)               | 0 (0.0%)              | 0 (0.0%)            | 0 (0.0%)            | 0 (0.0%)            | .       |

EPIC-26 results - EBRT

| Statistic Variable or Category                                                                                 | EBRT (n=1037) | Australia/New Zealand (n=104) | Canada (n=354) | Central Europe (n=439) | United Kingdom (n=53) | Italy (n=24) | Spain (n=47) | USA (n=16)   | P Value |
|----------------------------------------------------------------------------------------------------------------|---------------|-------------------------------|----------------|------------------------|-----------------------|--------------|--------------|--------------|---------|
| Missing                                                                                                        | 55            | 3                             | 3              | 42                     | 1                     | 4            |              | 2            | .       |
| How big a problem, if any, has weak urine stream been for you during the last 4 weeks?                         |               |                               |                |                        |                       |              |              |              | .       |
| No problem                                                                                                     | 521 (52.2%)   | 52 (50.5%)                    | 187 (53.1%)    | 208 (50.6%)            | 24 (46.2%)            | 15 (75.0%)   | 29 (61.7%)   | 6 (42.9%)    | 0.2092  |
| Very small problem                                                                                             | 222 (22.2%)   | 24 (23.3%)                    | 84 (23.9%)     | 94 (22.9%)             | 13 (25.0%)            | 3 (15.0%)    | 1 (2.1%)     | 3 (21.4%)    | .       |
| Small problem                                                                                                  | 156 (15.6%)   | 18 (17.5%)                    | 48 (13.6%)     | 66 (16.1%)             | 6 (11.5%)             | 2 (10.0%)    | 13 (27.7%)   | 3 (21.4%)    | .       |
| Moderate problem                                                                                               | 84 (8.4%)     | 7 (6.8%)                      | 29 (8.2%)      | 36 (8.8%)              | 8 (15.4%)             | 0 (0.0%)     | 3 (6.4%)     | 1 (7.1%)     | .       |
| Big problem                                                                                                    | 16 (1.6%)     | 2 (1.9%)                      | 4 (1.1%)       | 7 (1.7%)               | 1 (1.9%)              | 0 (0.0%)     | 1 (2.1%)     | 1 (7.1%)     | .       |
| Missing                                                                                                        | 38            | 1                             | 2              | 28                     | 1                     | 4            |              | 2            | .       |
| How big a problem, if any, has need to urinate frequently during the day been for you during the last 4 weeks? |               |                               |                |                        |                       |              |              |              | .       |
| No problem                                                                                                     | 467 (46.2%)   | 40 (38.8%)                    | 157 (44.5%)    | 204 (48.7%)            | 16 (30.2%)            | 9 (40.9%)    | 36 (76.6%)   | 5 (35.7%)    | 0.0047  |
| Very small problem                                                                                             | 240 (23.7%)   | 32 (31.1%)                    | 88 (24.9%)     | 95 (22.7%)             | 13 (24.5%)            | 9 (40.9%)    | 0 (0.0%)     | 3 (21.4%)    | .       |
| Small problem                                                                                                  | 170 (16.8%)   | 21 (20.4%)                    | 58 (16.4%)     | 69 (16.5%)             | 12 (22.6%)            | 2 (9.1%)     | 5 (10.6%)    | 3 (21.4%)    | .       |
| Moderate problem                                                                                               | 107 (10.6%)   | 9 (8.7%)                      | 38 (10.8%)     | 41 (9.8%)              | 11 (20.8%)            | 2 (9.1%)     | 4 (8.5%)     | 2 (14.3%)    | .       |
| Big problem                                                                                                    | 27 (2.7%)     | 1 (1.0%)                      | 12 (3.4%)      | 10 (2.4%)              | 1 (1.9%)              | 0 (0.0%)     | 2 (4.3%)     | 1 (7.1%)     | .       |
| Missing                                                                                                        | 26            | 1                             | 1              | 20                     |                       | 2            |              | 2            | .       |
| Overall how big a problem has your urinary function been for you during the last 4 weeks?                      |               |                               |                |                        |                       |              |              |              | .       |
| No problem                                                                                                     | 577 (57.5%)   | 58 (56.9%)                    | 190 (54.4%)    | 261 (63.0%)            | 21 (39.6%)            | 15 (65.2%)   | 24 (51.1%)   | 8 (50.0%)    | <.0001  |
| Very small problem                                                                                             | 220 (21.9%)   | 29 (28.4%)                    | 86 (24.6%)     | 79 (19.1%)             | 17 (32.1%)            | 5 (21.7%)    | 0 (0.0%)     | 4 (25.0%)    | .       |
| Small problem                                                                                                  | 116 (11.6%)   | 9 (8.8%)                      | 42 (12.0%)     | 38 (9.2%)              | 10 (18.9%)            | 2 (8.7%)     | 14 (29.8%)   | 1 (6.3%)     | .       |
| Moderate problem                                                                                               | 76 (7.6%)     | 6 (5.9%)                      | 28 (8.0%)      | 28 (6.8%)              | 5 (9.4%)              | 1 (4.3%)     | 6 (12.8%)    | 2 (12.5%)    | .       |
| Big problem                                                                                                    | 15 (1.5%)     | 0 (0.0%)                      | 3 (0.9%)       | 8 (1.9%)               | 0 (0.0%)              | 0 (0.0%)     | 3 (6.4%)     | 1 (6.3%)     | .       |
| Missing                                                                                                        | 33            | 2                             | 5              | 25                     |                       | 1            |              |              | .       |
| Bowel                                                                                                          |               |                               |                |                        |                       |              |              |              | .       |
| n                                                                                                              | 948           | 102                           | 349            | 368                    | 51                    | 16           | 47           | 15           | 0.0046  |
| Mean (SD)                                                                                                      | 95.6 (9.91)   | 94.6 (9.50)                   | 95.5 (10.05)   | 95.9 (9.43)            | 94.9 (12.29)          | 95.3 (7.89)  | 98.5 (6.58)  | 90.3 (18.28) | .       |





EPIC-26 results - EBRT

| Statistic Variable or Category                                                          | EBRT (n=1037)      | Australia/New Zealand (n=104) | Canada (n=354)     | Central Europe (n=439) | United Kingdom (n=53) | Italy (n=24)       | Spain (n=47)       | USA (n=16)         | P Value |
|-----------------------------------------------------------------------------------------|--------------------|-------------------------------|--------------------|------------------------|-----------------------|--------------------|--------------------|--------------------|---------|
| No problem                                                                              | 920 (96.6%)        | 98 (96.1%)                    | 332 (94.9%)        | 361 (97.3%)            | 51 (100.0%)           | 16 (100.0%)        | 47 (100.0%)        | 15 (100.0%)        | 0.9566  |
| Very small problem                                                                      | 24 (2.5%)          | 3 (2.9%)                      | 15 (4.3%)          | 6 (1.6%)               | 0 (0.0%)              | 0 (0.0%)           | 0 (0.0%)           | 0 (0.0%)           | .       |
| Small problem                                                                           | 5 (0.5%)           | 1 (1.0%)                      | 1 (0.3%)           | 3 (0.8%)               | 0 (0.0%)              | 0 (0.0%)           | 0 (0.0%)           | 0 (0.0%)           | .       |
| Moderate problem                                                                        | 2 (0.2%)           | 0 (0.0%)                      | 1 (0.3%)           | 1 (0.3%)               | 0 (0.0%)              | 0 (0.0%)           | 0 (0.0%)           | 0 (0.0%)           | .       |
| Big problem                                                                             | 1 (0.1%)           | 0 (0.0%)                      | 1 (0.3%)           | 0 (0.0%)               | 0 (0.0%)              | 0 (0.0%)           | 0 (0.0%)           | 0 (0.0%)           | .       |
| Missing                                                                                 | 85                 | 2                             | 4                  | 68                     | 2                     | 8                  |                    | 1                  | .       |
| How big a problem, if any, has abdominal/pelvic/rectal pain been for you?               |                    |                               |                    |                        |                       |                    |                    |                    |         |
| No problem                                                                              | 830 (87.2%)        | 82 (80.4%)                    | 306 (87.4%)        | 331 (89.2%)            | 42 (82.4%)            | 13 (81.3%)         | 45 (95.7%)         | 11 (73.3%)         | 0.0301  |
| Very small problem                                                                      | 74 (7.8%)          | 12 (11.8%)                    | 32 (9.1%)          | 20 (5.4%)              | 5 (9.8%)              | 3 (18.8%)          | 0 (0.0%)           | 2 (13.3%)          | .       |
| Small problem                                                                           | 22 (2.3%)          | 4 (3.9%)                      | 3 (0.9%)           | 13 (3.5%)              | 0 (0.0%)              | 0 (0.0%)           | 1 (2.1%)           | 1 (6.7%)           | .       |
| Moderate problem                                                                        | 21 (2.2%)          | 2 (2.0%)                      | 7 (2.0%)           | 6 (1.6%)               | 4 (7.8%)              | 0 (0.0%)           | 1 (2.1%)           | 1 (6.7%)           | .       |
| Big problem                                                                             | 5 (0.5%)           | 2 (2.0%)                      | 2 (0.6%)           | 1 (0.3%)               | 0 (0.0%)              | 0 (0.0%)           | 0 (0.0%)           | 0 (0.0%)           | .       |
| Missing                                                                                 | 85                 | 2                             | 4                  | 68                     | 2                     | 8                  |                    | 1                  | .       |
| Overall, how big a problem have your bowel habits been for you during the last 4 weeks? |                    |                               |                    |                        |                       |                    |                    |                    |         |
| No problem                                                                              | 849 (82.8%)        | 82 (79.6%)                    | 291 (82.7%)        | 353 (81.7%)            | 46 (86.8%)            | 19 (86.4%)         | 45 (95.7%)         | 13 (81.3%)         | 0.1699  |
| Very small problem                                                                      | 109 (10.6%)        | 17 (16.5%)                    | 41 (11.6%)         | 44 (10.2%)             | 4 (7.5%)              | 2 (9.1%)           | 0 (0.0%)           | 1 (6.3%)           | .       |
| Small problem                                                                           | 29 (2.8%)          | 3 (2.9%)                      | 6 (1.7%)           | 17 (3.9%)              | 1 (1.9%)              | 1 (4.5%)           | 0 (0.0%)           | 1 (6.3%)           | .       |
| Moderate problem                                                                        | 31 (3.0%)          | 1 (1.0%)                      | 10 (2.8%)          | 16 (3.7%)              | 2 (3.8%)              | 0 (0.0%)           | 2 (4.3%)           | 0 (0.0%)           | .       |
| Big problem                                                                             | 7 (0.7%)           | 0 (0.0%)                      | 4 (1.1%)           | 2 (0.5%)               | 0 (0.0%)              | 0 (0.0%)           | 0 (0.0%)           | 1 (6.3%)           | .       |
| Missing                                                                                 | 12                 | 1                             | 2                  | 7                      |                       | 2                  |                    |                    | .       |
| Sexual                                                                                  |                    |                               |                    |                        |                       |                    |                    |                    |         |
| n                                                                                       | 953                | 99                            | 339                | 382                    | 51                    | 21                 | 47                 | 14                 | 0.0005  |
| Mean (SD)                                                                               | 49.7 (30.08)       | 59.1 (29.05)                  | 52.8 (29.67)       | 45.6 (29.76)           | 45.9 (30.75)          | 44.0 (26.36)       | 45.1 (31.44)       | 57.8 (34.62)       | .       |
| Median (Q1-Q3)                                                                          | 50.0 (20.8 - 79.2) | 58.3 (34.7 - 87.5)            | 54.2 (26.6 - 82.0) | 43.0 (16.7 - 70.8)     | 43.0 (16.7 - 77.8)    | 50.0 (20.8 - 57.0) | 30.5 (16.7 - 83.3) | 62.5 (43.0 - 87.5) | .       |
| Min, Max                                                                                | 0.0, 100.0         | 0.0, 100.0                    | 0.0, 100.0         | 0.0, 100.0             | 0.0, 100.0            | 0.0, 100.0         | 0.0, 91.7          | 0.0, 100.0         | .       |

EPIC-26 results - EBRT

| Statistic Variable or Category                                                      | EBRT (n=1037) | Australia/New Zealand (n=104) | Canada (n=354) | Central Europe (n=439) | United Kingdom (n=53) | Italy (n=24) | Spain (n=47) | USA (n=16) | P Value |
|-------------------------------------------------------------------------------------|---------------|-------------------------------|----------------|------------------------|-----------------------|--------------|--------------|------------|---------|
| How would you rate your ability to have an erection during the last 4 weeks?        |               |                               |                |                        |                       |              |              |            | .       |
| Very poor to none                                                                   | 260 (26.6%)   | 16 (15.8%)                    | 68 (19.8%)     | 132 (33.3%)            | 16 (30.8%)            | 6 (27.3%)    | 20 (42.6%)   | 2 (13.3%)  | <.0001  |
| Poor                                                                                | 179 (18.3%)   | 13 (12.9%)                    | 77 (22.4%)     | 63 (15.9%)             | 10 (19.2%)            | 6 (27.3%)    | 7 (14.9%)    | 3 (20.0%)  | .       |
| Fair                                                                                | 238 (24.4%)   | 32 (31.7%)                    | 80 (23.3%)     | 97 (24.5%)             | 11 (21.2%)            | 7 (31.8%)    | 7 (14.9%)    | 4 (26.7%)  | .       |
| Good                                                                                | 220 (22.5%)   | 19 (18.8%)                    | 86 (25.1%)     | 86 (21.7%)             | 13 (25.0%)            | 2 (9.1%)     | 13 (27.7%)   | 1 (6.7%)   | .       |
| Very good                                                                           | 79 (8.1%)     | 21 (20.8%)                    | 32 (9.3%)      | 18 (4.5%)              | 2 (3.8%)              | 1 (4.5%)     | 0 (0.0%)     | 5 (33.3%)  | .       |
| Missing                                                                             | 61            | 3                             | 11             | 43                     | 1                     | 2            |              | 1          | .       |
| How would you rate your ability to reach orgasm (climax) during the last 4 weeks?   |               |                               |                |                        |                       |              |              |            | .       |
| Very poor to none                                                                   | 242 (25.3%)   | 12 (12.0%)                    | 64 (18.7%)     | 124 (32.6%)            | 16 (32.0%)            | 4 (20.0%)    | 20 (42.6%)   | 2 (13.3%)  | <.0001  |
| Poor                                                                                | 162 (17.0%)   | 11 (11.0%)                    | 72 (21.0%)     | 59 (15.5%)             | 7 (14.0%)             | 5 (25.0%)    | 6 (12.8%)    | 2 (13.3%)  | .       |
| Fair                                                                                | 216 (22.6%)   | 24 (24.0%)                    | 83 (24.2%)     | 84 (22.1%)             | 11 (22.0%)            | 7 (35.0%)    | 3 (6.4%)     | 4 (26.7%)  | .       |
| Good                                                                                | 253 (26.5%)   | 29 (29.0%)                    | 94 (27.4%)     | 95 (25.0%)             | 11 (22.0%)            | 3 (15.0%)    | 18 (38.3%)   | 3 (20.0%)  | .       |
| Very good                                                                           | 82 (8.6%)     | 24 (24.0%)                    | 30 (8.7%)      | 18 (4.7%)              | 5 (10.0%)             | 1 (5.0%)     | 0 (0.0%)     | 4 (26.7%)  | .       |
| Missing                                                                             | 82            | 4                             | 11             | 59                     | 3                     | 4            |              | 1          | .       |
| How would you describe the usual quality of your erections during the last 4 weeks? |               |                               |                |                        |                       |              |              |            | .       |
| None at all                                                                         | 274 (28.2%)   | 16 (15.8%)                    | 68 (19.9%)     | 146 (37.3%)            | 11 (21.2%)            | 7 (31.8%)    | 20 (42.6%)   | 6 (37.5%)  | <.0001  |
| Not firm enough for any sexual activity                                             | 169 (17.4%)   | 15 (14.9%)                    | 66 (19.4%)     | 60 (15.3%)             | 16 (30.8%)            | 5 (22.7%)    | 6 (12.8%)    | 1 (6.3%)   | .       |
| Firm enough for masturbation and foreplay                                           | 169 (17.4%)   | 19 (18.8%)                    | 64 (18.8%)     | 64 (16.4%)             | 11 (21.2%)            | 4 (18.2%)    | 3 (6.4%)     | 4 (25.0%)  | .       |
| Firm enough for intercourse                                                         | 358 (36.9%)   | 51 (50.5%)                    | 143 (41.9%)    | 121 (30.9%)            | 14 (26.9%)            | 6 (27.3%)    | 18 (38.3%)   | 5 (31.3%)  | .       |
| Missing                                                                             | 67            | 3                             | 13             | 48                     | 1                     | 2            |              |            | .       |
| How would you describe the frequency of your erections during the last 4 weeks?     |               |                               |                |                        |                       |              |              |            | .       |
| I never had an erection when I wanted one                                           | 290 (30.4%)   | 24 (24.0%)                    | 72 (21.2%)     | 139 (36.6%)            | 17 (33.3%)            | 8 (38.1%)    | 27 (57.4%)   | 3 (20.0%)  | <.0001  |

EPIC-26 results - EBRT

| Statistic Variable or Category                                                              | EBRT (n=1037)       | Australia/New Zealand (n=104) | Canada (n=354)       | Central Europe (n=439) | United Kingdom (n=53) | Italy (n=24)         | Spain (n=47)        | USA (n=16)          | P Value |
|---------------------------------------------------------------------------------------------|---------------------|-------------------------------|----------------------|------------------------|-----------------------|----------------------|---------------------|---------------------|---------|
| I had an erection less than half the time I wanted one                                      | 148 (15.5%)         | 13 (13.0%)                    | 65 (19.2%)           | 57 (15.0%)             | 9 (17.6%)             | 2 (9.5%)             | 0 (0.0%)            | 2 (13.3%)           | .       |
| I had an erection about half the time I wanted one                                          | 135 (14.2%)         | 11 (11.0%)                    | 56 (16.5%)           | 53 (13.9%)             | 4 (7.8%)              | 4 (19.0%)            | 4 (8.5%)            | 3 (20.0%)           | .       |
| I had an erection more than half the time I wanted one                                      | 122 (12.8%)         | 26 (26.0%)                    | 41 (12.1%)           | 43 (11.3%)             | 6 (11.8%)             | 2 (9.5%)             | 2 (4.3%)            | 2 (13.3%)           | .       |
| I had an erection whenever I wanted one                                                     | 258 (27.1%)         | 26 (26.0%)                    | 105 (31.0%)          | 88 (23.2%)             | 15 (29.4%)            | 5 (23.8%)            | 14 (29.8%)          | 5 (33.3%)           | .       |
| Missing                                                                                     | 84                  | 4                             | 15                   | 59                     | 2                     | 3                    |                     | 1                   | .       |
| Overall, how would you rate your ability to function sexually during the last 4 weeks?      |                     |                               |                      |                        |                       |                      |                     |                     | .       |
| Very poor                                                                                   | 266 (27.6%)         | 18 (18.0%)                    | 76 (22.6%)           | 118 (30.1%)            | 20 (40.0%)            | 7 (30.4%)            | 24 (51.1%)          | 3 (20.0%)           | <.0001  |
| Poor                                                                                        | 185 (19.2%)         | 17 (17.0%)                    | 68 (20.2%)           | 82 (20.9%)             | 7 (14.0%)             | 5 (21.7%)            | 4 (8.5%)            | 2 (13.3%)           | .       |
| Fair                                                                                        | 223 (23.2%)         | 27 (27.0%)                    | 74 (22.0%)           | 96 (24.5%)             | 9 (18.0%)             | 9 (39.1%)            | 6 (12.8%)           | 2 (13.3%)           | .       |
| Good                                                                                        | 211 (21.9%)         | 24 (24.0%)                    | 79 (23.5%)           | 81 (20.7%)             | 10 (20.0%)            | 1 (4.3%)             | 12 (25.5%)          | 4 (26.7%)           | .       |
| Very good                                                                                   | 78 (8.1%)           | 14 (14.0%)                    | 39 (11.6%)           | 15 (3.8%)              | 4 (8.0%)              | 1 (4.3%)             | 1 (2.1%)            | 4 (26.7%)           | .       |
| Missing                                                                                     | 74                  | 4                             | 18                   | 47                     | 3                     | 1                    |                     | 1                   | .       |
| Overall, how big a problem have your sexual functions been for you during the last 4 weeks? |                     |                               |                      |                        |                       |                      |                     |                     | .       |
| No problem                                                                                  | 453 (46.5%)         | 47 (46.5%)                    | 140 (40.8%)          | 187 (47.7%)            | 20 (38.5%)            | 11 (47.8%)           | 40 (85.1%)          | 8 (50.0%)           | 0.0015  |
| Very small problem                                                                          | 125 (12.8%)         | 11 (10.9%)                    | 44 (12.8%)           | 55 (14.0%)             | 8 (15.4%)             | 6 (26.1%)            | 0 (0.0%)            | 1 (6.3%)            | .       |
| Small problem                                                                               | 181 (18.6%)         | 24 (23.8%)                    | 74 (21.6%)           | 63 (16.1%)             | 10 (19.2%)            | 3 (13.0%)            | 4 (8.5%)            | 3 (18.8%)           | .       |
| Moderate problem                                                                            | 121 (12.4%)         | 13 (12.9%)                    | 52 (15.2%)           | 46 (11.7%)             | 7 (13.5%)             | 1 (4.3%)             | 1 (2.1%)            | 1 (6.3%)            | .       |
| Big problem                                                                                 | 94 (9.7%)           | 6 (5.9%)                      | 33 (9.6%)            | 41 (10.5%)             | 7 (13.5%)             | 2 (8.7%)             | 2 (4.3%)            | 3 (18.8%)           | .       |
| Missing                                                                                     | 63                  | 3                             | 11                   | 47                     | 1                     | 1                    |                     |                     | .       |
| Hormonal                                                                                    |                     |                               |                      |                        |                       |                      |                     |                     | .       |
| n                                                                                           | 960                 | 100                           | 350                  | 376                    | 52                    | 20                   | 47                  | 15                  | 0.0012  |
| Mean (SD)                                                                                   | 90.9 (13.42)        | 90.2 (13.08)                  | 93.2 (11.15)         | 89.8 (15.33)           | 89.0 (12.37)          | 91.8 (10.48)         | 87.3 (13.98)        | 90.0 (12.82)        | .       |
| Median (Q1-Q3)                                                                              | 95.0 (85.0 - 100.0) | 95.0 (85.0 - 100.0)           | 100.0 (90.0 - 100.0) | 95.0 (85.0 - 100.0)    | 91.9 (85.0 - 97.5)    | 100.0 (83.1 - 100.0) | 90.0 (80.0 - 100.0) | 95.0 (80.0 - 100.0) | .       |



EPIC-26 results - EBRT

| Statistic Variable or Category                                                             | EBRT<br>(n=1037) | Australia/New Zealand<br>(n=104) | Canada<br>(n=354) | Central Europe<br>(n=439) | United Kingdom<br>(n=53) | Italy<br>(n=24) | Spain<br>(n=47) | USA<br>(n=16) | P Value |
|--------------------------------------------------------------------------------------------|------------------|----------------------------------|-------------------|---------------------------|--------------------------|-----------------|-----------------|---------------|---------|
| No problem                                                                                 | 573 (58.4%)      | 53 (52.5%)                       | 218 (61.9%)       | 224 (56.9%)               | 20 (39.2%)               | 16 (76.2%)      | 35 (74.5%)      | 7 (46.7%)     | 0.0001  |
| Very small problem                                                                         | 190 (19.4%)      | 21 (20.8%)                       | 71 (20.2%)        | 77 (19.5%)                | 16 (31.4%)               | 2 (9.5%)        | 0 (0.0%)        | 3 (20.0%)     | .       |
| Small problem                                                                              | 126 (12.8%)      | 13 (12.9%)                       | 40 (11.4%)        | 60 (15.2%)                | 6 (11.8%)                | 2 (9.5%)        | 4 (8.5%)        | 1 (6.7%)      | .       |
| Moderate problem                                                                           | 71 (7.2%)        | 11 (10.9%)                       | 19 (5.4%)         | 20 (5.1%)                 | 9 (17.6%)                | 1 (4.8%)        | 7 (14.9%)       | 4 (26.7%)     | .       |
| Big problem                                                                                | 21 (2.1%)        | 3 (3.0%)                         | 4 (1.1%)          | 13 (3.3%)                 | 0 (0.0%)                 | 0 (0.0%)        | 1 (2.1%)        | 0 (0.0%)      | .       |
| Missing                                                                                    | 56               | 3                                | 2                 | 45                        | 2                        | 3               |                 | 1             | .       |
| How big a problem during the last 4 weeks, if any, has change in body weight been for you? |                  |                                  |                   |                           |                          |                 |                 |               | .       |
| No problem                                                                                 | 806 (82.4%)      | 77 (74.8%)                       | 297 (84.6%)       | 318 (81.3%)               | 39 (78.0%)               | 15 (71.4%)      | 46 (97.9%)      | 14 (93.3%)    | 0.0278  |
| Very small problem                                                                         | 89 (9.1%)        | 14 (13.6%)                       | 33 (9.4%)         | 36 (9.2%)                 | 4 (8.0%)                 | 2 (9.5%)        | 0 (0.0%)        | 0 (0.0%)      | .       |
| Small problem                                                                              | 46 (4.7%)        | 7 (6.8%)                         | 12 (3.4%)         | 16 (4.1%)                 | 6 (12.0%)                | 4 (19.0%)       | 0 (0.0%)        | 1 (6.7%)      | .       |
| Moderate problem                                                                           | 31 (3.2%)        | 5 (4.9%)                         | 7 (2.0%)          | 17 (4.3%)                 | 1 (2.0%)                 | 0 (0.0%)        | 1 (2.1%)        | 0 (0.0%)      | .       |
| Big problem                                                                                | 6 (0.6%)         | 0 (0.0%)                         | 2 (0.6%)          | 4 (1.0%)                  | 0 (0.0%)                 | 0 (0.0%)        | 0 (0.0%)        | 0 (0.0%)      | .       |
| Missing                                                                                    | 59               | 1                                | 3                 | 48                        | 3                        | 3               |                 | 1             | .       |



EPIC-26 results - Brachytherapy

| Statistic Variable or Category                                                                    | Brachytherapy (n=271) | Australia/New Zealand (n=22) | Canada (n=83)       | Central Europe (n=89) | United Kingdom (n=30) | Spain (n=41)         | USA (n=6)           | P Value |
|---------------------------------------------------------------------------------------------------|-----------------------|------------------------------|---------------------|-----------------------|-----------------------|----------------------|---------------------|---------|
| No problem                                                                                        | 229 (84.8%)           | 15 (71.4%)                   | 70 (84.3%)          | 77 (86.5%)            | 28 (93.3%)            | 34 (82.9%)           | 5 (83.3%)           | 0.0029  |
| Very small problem                                                                                | 27 (10.0%)            | 6 (28.6%)                    | 10 (12.0%)          | 9 (10.1%)             | 2 (6.7%)              | 0 (0.0%)             | 0 (0.0%)            | .       |
| Small problem                                                                                     | 10 (3.7%)             | 0 (0.0%)                     | 3 (3.6%)            | 3 (3.4%)              | 0 (0.0%)              | 3 (7.3%)             | 1 (16.7%)           | .       |
| Moderate problem                                                                                  | 2 (0.7%)              | 0 (0.0%)                     | 0 (0.0%)            | 0 (0.0%)              | 0 (0.0%)              | 2 (4.9%)             | 0 (0.0%)            | .       |
| Big problem                                                                                       | 2 (0.7%)              | 0 (0.0%)                     | 0 (0.0%)            | 0 (0.0%)              | 0 (0.0%)              | 2 (4.9%)             | 0 (0.0%)            | .       |
| Missing                                                                                           | 1                     | 1                            |                     |                       |                       |                      |                     | .       |
| Urinary Irritative/Obst.                                                                          |                       |                              |                     |                       |                       |                      |                     | .       |
| n                                                                                                 | 258                   | 19                           | 83                  | 81                    | 28                    | 41                   | 6                   | 0.5220  |
| Mean (SD)                                                                                         | 92.0 (11.28)          | 89.1 (11.76)                 | 93.5 (7.59)         | 92.2 (10.15)          | 93.3 (9.31)           | 89.3 (18.66)         | 90.6 (7.65)         | .       |
| Median (Q1-Q3)                                                                                    | 93.8 (87.5 - 100.0)   | 93.8 (81.3 - 100.0)          | 93.8 (87.5 - 100.0) | 93.8 (87.5 - 100.0)   | 96.9 (90.6 - 100.0)   | 100.0 (81.3 - 100.0) | 87.5 (87.5 - 100.0) | .       |
| Min, Max                                                                                          | 31.3, 100.0           | 62.5, 100.0                  | 62.5, 100.0         | 62.5, 100.0           | 68.8, 100.0           | 31.3, 100.0          | 81.3, 100.0         | .       |
| How big a problem, if any, has pain or burning on urination been for you during the last 4 weeks? |                       |                              |                     |                       |                       |                      |                     | .       |
| No problem                                                                                        | 237 (90.5%)           | 18 (85.7%)                   | 78 (94.0%)          | 75 (92.6%)            | 27 (90.0%)            | 33 (80.5%)           | 6 (100.0%)          | 0.1064  |
| Very small problem                                                                                | 17 (6.5%)             | 3 (14.3%)                    | 4 (4.8%)            | 5 (6.2%)              | 3 (10.0%)             | 2 (4.9%)             | 0 (0.0%)            | .       |
| Small problem                                                                                     | 5 (1.9%)              | 0 (0.0%)                     | 1 (1.2%)            | 1 (1.2%)              | 0 (0.0%)              | 3 (7.3%)             | 0 (0.0%)            | .       |
| Moderate problem                                                                                  | 2 (0.8%)              | 0 (0.0%)                     | 0 (0.0%)            | 0 (0.0%)              | 0 (0.0%)              | 2 (4.9%)             | 0 (0.0%)            | .       |
| Big problem                                                                                       | 1 (0.4%)              | 0 (0.0%)                     | 0 (0.0%)            | 0 (0.0%)              | 0 (0.0%)              | 1 (2.4%)             | 0 (0.0%)            | .       |
| Missing                                                                                           | 9                     | 1                            |                     | 8                     |                       |                      |                     | .       |
| How big a problem, if any, has bleeding with urination been for you during the last 4 weeks?      |                       |                              |                     |                       |                       |                      |                     | .       |
| No problem                                                                                        | 256 (97.3%)           | 17 (81.0%)                   | 82 (98.8%)          | 82 (98.8%)            | 29 (100.0%)           | 40 (97.6%)           | 6 (100.0%)          | 0.0006  |
| Very small problem                                                                                | 4 (1.5%)              | 2 (9.5%)                     | 1 (1.2%)            | 1 (1.2%)              | 0 (0.0%)              | 0 (0.0%)             | 0 (0.0%)            | .       |
| Small problem                                                                                     | 2 (0.8%)              | 2 (9.5%)                     | 0 (0.0%)            | 0 (0.0%)              | 0 (0.0%)              | 0 (0.0%)             | 0 (0.0%)            | .       |
| Big problem                                                                                       | 1 (0.4%)              | 0 (0.0%)                     | 0 (0.0%)            | 0 (0.0%)              | 0 (0.0%)              | 1 (2.4%)             | 0 (0.0%)            | .       |
| Missing                                                                                           | 8                     | 1                            |                     | 6                     | 1                     |                      |                     | .       |

EPIC-26 results - Brachytherapy

| Statistic Variable or Category                                                                                 | Brachytherapy (n=271) | Australia/New Zealand (n=22) | Canada (n=83)        | Central Europe (n=89) | United Kingdom (n=30) | Spain (n=41)          | USA (n=6)            | P Value |
|----------------------------------------------------------------------------------------------------------------|-----------------------|------------------------------|----------------------|-----------------------|-----------------------|-----------------------|----------------------|---------|
| How big a problem, if any, has weak urine stream been for you during the last 4 weeks?                         |                       |                              |                      |                       |                       |                       |                      | .       |
| No problem                                                                                                     | 175 (66.5%)           | 13 (61.9%)                   | 52 (62.7%)           | 54 (65.9%)            | 21 (70.0%)            | 32 (78.0%)            | 3 (50.0%)            | 0.0413  |
| Very small problem                                                                                             | 58 (22.1%)            | 6 (28.6%)                    | 25 (30.1%)           | 18 (22.0%)            | 7 (23.3%)             | 0 (0.0%)              | 2 (33.3%)            | .       |
| Small problem                                                                                                  | 17 (6.5%)             | 1 (4.8%)                     | 4 (4.8%)             | 8 (9.8%)              | 0 (0.0%)              | 3 (7.3%)              | 1 (16.7%)            | .       |
| Moderate problem                                                                                               | 8 (3.0%)              | 1 (4.8%)                     | 1 (1.2%)             | 1 (1.2%)              | 2 (6.7%)              | 3 (7.3%)              | 0 (0.0%)             | .       |
| Big problem                                                                                                    | 5 (1.9%)              | 0 (0.0%)                     | 1 (1.2%)             | 1 (1.2%)              | 0 (0.0%)              | 3 (7.3%)              | 0 (0.0%)             | .       |
| Missing                                                                                                        | 8                     | 1                            |                      | 7                     |                       |                       |                      | .       |
| How big a problem, if any, has need to urinate frequently during the day been for you during the last 4 weeks? |                       |                              |                      |                       |                       |                       |                      | .       |
| No problem                                                                                                     | 163 (62.2%)           | 9 (45.0%)                    | 51 (61.4%)           | 49 (59.0%)            | 17 (58.6%)            | 34 (82.9%)            | 3 (50.0%)            | 0.0056  |
| Very small problem                                                                                             | 62 (23.7%)            | 7 (35.0%)                    | 26 (31.3%)           | 21 (25.3%)            | 7 (24.1%)             | 0 (0.0%)              | 1 (16.7%)            | .       |
| Small problem                                                                                                  | 23 (8.8%)             | 3 (15.0%)                    | 5 (6.0%)             | 7 (8.4%)              | 4 (13.8%)             | 2 (4.9%)              | 2 (33.3%)            | .       |
| Moderate problem                                                                                               | 12 (4.6%)             | 1 (5.0%)                     | 1 (1.2%)             | 6 (7.2%)              | 1 (3.4%)              | 3 (7.3%)              | 0 (0.0%)             | .       |
| Big problem                                                                                                    | 2 (0.8%)              | 0 (0.0%)                     | 0 (0.0%)             | 0 (0.0%)              | 0 (0.0%)              | 2 (4.9%)              | 0 (0.0%)             | .       |
| Missing                                                                                                        | 9                     | 2                            |                      | 6                     | 1                     |                       |                      | .       |
| Overall how big a problem has your urinary function been for you during the last 4 weeks?                      |                       |                              |                      |                       |                       |                       |                      | .       |
| No problem                                                                                                     | 199 (73.4%)           | 13 (59.1%)                   | 60 (72.3%)           | 72 (80.9%)            | 22 (73.3%)            | 28 (68.3%)            | 4 (66.7%)            | <.0001  |
| Very small problem                                                                                             | 44 (16.2%)            | 7 (31.8%)                    | 19 (22.9%)           | 13 (14.6%)            | 4 (13.3%)             | 0 (0.0%)              | 1 (16.7%)            | .       |
| Small problem                                                                                                  | 17 (6.3%)             | 2 (9.1%)                     | 4 (4.8%)             | 2 (2.2%)              | 3 (10.0%)             | 5 (12.2%)             | 1 (16.7%)            | .       |
| Moderate problem                                                                                               | 8 (3.0%)              | 0 (0.0%)                     | 0 (0.0%)             | 2 (2.2%)              | 1 (3.3%)              | 5 (12.2%)             | 0 (0.0%)             | .       |
| Big problem                                                                                                    | 3 (1.1%)              | 0 (0.0%)                     | 0 (0.0%)             | 0 (0.0%)              | 0 (0.0%)              | 3 (7.3%)              | 0 (0.0%)             | .       |
| Bowel                                                                                                          |                       |                              |                      |                       |                       |                       |                      | .       |
| n                                                                                                              | 263                   | 22                           | 83                   | 81                    | 30                    | 41                    | 6                    | 0.0009  |
| Mean (SD)                                                                                                      | 96.6 (9.83)           | 88.8 (16.77)                 | 97.7 (4.97)          | 98.5 (5.44)           | 94.9 (12.66)          | 95.3 (14.53)          | 98.6 (2.15)          | .       |
| Median (Q1-Q3)                                                                                                 | 100.0 (100.0 - 100.0) | 95.8 (83.3 - 100.0)          | 100.0 (95.8 - 100.0) | 100.0 (100.0 - 100.0) | 100.0 (95.8 - 100.0)  | 100.0 (100.0 - 100.0) | 100.0 (95.8 - 100.0) | .       |
| Min, Max                                                                                                       | 20.8, 100.0           | 41.7, 100.0                  | 70.8, 100.0          | 66.7, 100.0           | 41.7, 100.0           | 20.8, 100.0           | 95.8, 100.0          | .       |



EPIC-26 results - Brachytherapy

| Statistic Variable or Category                                                      | Brachytherapy (n=271) | Australia/New Zealand (n=22) | Canada (n=83) | Central Europe (n=89) | United Kingdom (n=30) | Spain (n=41) | USA (n=6)  | P Value |
|-------------------------------------------------------------------------------------|-----------------------|------------------------------|---------------|-----------------------|-----------------------|--------------|------------|---------|
| How big a problem, if any, has urgency to have a bowel movement been for you?       |                       |                              |               |                       |                       |              |            | .       |
| No problem                                                                          | 237 (87.5%)           | 13 (59.1%)                   | 71 (85.5%)    | 84 (94.4%)            | 24 (80.0%)            | 40 (97.6%)   | 5 (83.3%)  | 0.0002  |
| Very small problem                                                                  | 22 (8.1%)             | 4 (18.2%)                    | 10 (12.0%)    | 2 (2.2%)              | 5 (16.7%)             | 0 (0.0%)     | 1 (16.7%)  | .       |
| Small problem                                                                       | 8 (3.0%)              | 3 (13.6%)                    | 2 (2.4%)      | 3 (3.4%)              | 0 (0.0%)              | 0 (0.0%)     | 0 (0.0%)   | .       |
| Moderate problem                                                                    | 3 (1.1%)              | 2 (9.1%)                     | 0 (0.0%)      | 0 (0.0%)              | 1 (3.3%)              | 0 (0.0%)     | 0 (0.0%)   | .       |
| Big problem                                                                         | 1 (0.4%)              | 0 (0.0%)                     | 0 (0.0%)      | 0 (0.0%)              | 0 (0.0%)              | 1 (2.4%)     | 0 (0.0%)   | .       |
| How big a problem, if any, has increased frequency of bowel movements been for you? |                       |                              |               |                       |                       |              |            | .       |
| No problem                                                                          | 240 (91.3%)           | 13 (59.1%)                   | 78 (94.0%)    | 78 (96.3%)            | 27 (90.0%)            | 38 (92.7%)   | 6 (100.0%) | 0.0002  |
| Very small problem                                                                  | 13 (4.9%)             | 5 (22.7%)                    | 5 (6.0%)      | 1 (1.2%)              | 2 (6.7%)              | 0 (0.0%)     | 0 (0.0%)   | .       |
| Small problem                                                                       | 4 (1.5%)              | 1 (4.5%)                     | 0 (0.0%)      | 2 (2.5%)              | 0 (0.0%)              | 1 (2.4%)     | 0 (0.0%)   | .       |
| Moderate problem                                                                    | 5 (1.9%)              | 3 (13.6%)                    | 0 (0.0%)      | 0 (0.0%)              | 1 (3.3%)              | 1 (2.4%)     | 0 (0.0%)   | .       |
| Big problem                                                                         | 1 (0.4%)              | 0 (0.0%)                     | 0 (0.0%)      | 0 (0.0%)              | 0 (0.0%)              | 1 (2.4%)     | 0 (0.0%)   | .       |
| Missing                                                                             | 8                     |                              |               | 8                     |                       |              |            | .       |
| How big a problem, if any, has losing control of your stools been for you?          |                       |                              |               |                       |                       |              |            | .       |
| No problem                                                                          | 252 (95.8%)           | 17 (77.3%)                   | 82 (98.8%)    | 80 (98.8%)            | 28 (93.3%)            | 39 (95.1%)   | 6 (100.0%) | 0.0019  |
| Very small problem                                                                  | 7 (2.7%)              | 4 (18.2%)                    | 1 (1.2%)      | 0 (0.0%)              | 2 (6.7%)              | 0 (0.0%)     | 0 (0.0%)   | .       |
| Small problem                                                                       | 2 (0.8%)              | 1 (4.5%)                     | 0 (0.0%)      | 1 (1.2%)              | 0 (0.0%)              | 0 (0.0%)     | 0 (0.0%)   | .       |
| Moderate problem                                                                    | 1 (0.4%)              | 0 (0.0%)                     | 0 (0.0%)      | 0 (0.0%)              | 0 (0.0%)              | 1 (2.4%)     | 0 (0.0%)   | .       |
| Big problem                                                                         | 1 (0.4%)              | 0 (0.0%)                     | 0 (0.0%)      | 0 (0.0%)              | 0 (0.0%)              | 1 (2.4%)     | 0 (0.0%)   | .       |
| Missing                                                                             | 8                     |                              |               | 8                     |                       |              |            | .       |
| How big a problem, if any, has bloody stools been for you?                          |                       |                              |               |                       |                       |              |            | .       |
| No problem                                                                          | 254 (96.9%)           | 20 (90.9%)                   | 82 (98.8%)    | 80 (98.8%)            | 27 (93.1%)            | 39 (95.1%)   | 6 (100.0%) | 0.1514  |
| Very small problem                                                                  | 4 (1.5%)              | 1 (4.5%)                     | 1 (1.2%)      | 1 (1.2%)              | 1 (3.4%)              | 0 (0.0%)     | 0 (0.0%)   | .       |
| Small problem                                                                       | 3 (1.1%)              | 1 (4.5%)                     | 0 (0.0%)      | 0 (0.0%)              | 0 (0.0%)              | 2 (4.9%)     | 0 (0.0%)   | .       |
| Moderate problem                                                                    | 1 (0.4%)              | 0 (0.0%)                     | 0 (0.0%)      | 0 (0.0%)              | 1 (3.4%)              | 0 (0.0%)     | 0 (0.0%)   | .       |

EPIC-26 results - Brachytherapy

| Statistic Variable or Category                                                          | Brachytherapy (n=271) | Australia/New Zealand (n=22) | Canada (n=83)      | Central Europe (n=89) | United Kingdom (n=30) | Spain (n=41)       | USA (n=6)           | P Value |
|-----------------------------------------------------------------------------------------|-----------------------|------------------------------|--------------------|-----------------------|-----------------------|--------------------|---------------------|---------|
| Missing                                                                                 | 9                     |                              |                    | 8                     | 1                     |                    |                     | .       |
| How big a problem, if any, has abdominal/pelvic/rectal pain been for you?               |                       |                              |                    |                       |                       |                    |                     | .       |
| No problem                                                                              | 230 (87.5%)           | 16 (72.7%)                   | 72 (86.7%)         | 77 (93.9%)            | 24 (82.8%)            | 36 (87.8%)         | 5 (83.3%)           | 0.2458  |
| Very small problem                                                                      | 19 (7.2%)             | 4 (18.2%)                    | 8 (9.6%)           | 4 (4.9%)              | 2 (6.9%)              | 0 (0.0%)           | 1 (16.7%)           | .       |
| Small problem                                                                           | 8 (3.0%)              | 1 (4.5%)                     | 2 (2.4%)           | 0 (0.0%)              | 2 (6.9%)              | 3 (7.3%)           | 0 (0.0%)            | .       |
| Moderate problem                                                                        | 3 (1.1%)              | 1 (4.5%)                     | 1 (1.2%)           | 0 (0.0%)              | 0 (0.0%)              | 1 (2.4%)           | 0 (0.0%)            | .       |
| Big problem                                                                             | 3 (1.1%)              | 0 (0.0%)                     | 0 (0.0%)           | 1 (1.2%)              | 1 (3.4%)              | 1 (2.4%)           | 0 (0.0%)            | .       |
| Missing                                                                                 | 8                     |                              |                    | 7                     | 1                     |                    |                     | .       |
| Overall, how big a problem have your bowel habits been for you during the last 4 weeks? |                       |                              |                    |                       |                       |                    |                     | .       |
| No problem                                                                              | 246 (91.1%)           | 16 (76.2%)                   | 76 (91.6%)         | 84 (94.4%)            | 26 (86.7%)            | 38 (92.7%)         | 6 (100.0%)          | 0.3743  |
| Very small problem                                                                      | 13 (4.8%)             | 2 (9.5%)                     | 5 (6.0%)           | 4 (4.5%)              | 2 (6.7%)              | 0 (0.0%)           | 0 (0.0%)            | .       |
| Small problem                                                                           | 7 (2.6%)              | 2 (9.5%)                     | 2 (2.4%)           | 1 (1.1%)              | 1 (3.3%)              | 1 (2.4%)           | 0 (0.0%)            | .       |
| Moderate problem                                                                        | 3 (1.1%)              | 1 (4.8%)                     | 0 (0.0%)           | 0 (0.0%)              | 1 (3.3%)              | 1 (2.4%)           | 0 (0.0%)            | .       |
| Big problem                                                                             | 1 (0.4%)              | 0 (0.0%)                     | 0 (0.0%)           | 0 (0.0%)              | 0 (0.0%)              | 1 (2.4%)           | 0 (0.0%)            | .       |
| Missing                                                                                 | 1                     | 1                            |                    |                       |                       |                    |                     | .       |
| Sexual                                                                                  |                       |                              |                    |                       |                       |                    |                     | .       |
| n                                                                                       | 267                   | 22                           | 80                 | 88                    | 30                    | 41                 | 6                   | 0.0066  |
| Mean (SD)                                                                               | 66.1 (27.07)          | 70.7 (23.67)                 | 68.3 (25.24)       | 63.2 (25.95)          | 74.8 (29.08)          | 56.0 (30.70)       | 85.9 (18.66)        | .       |
| Median (Q1-Q3)                                                                          | 75.0 (45.8 - 87.5)    | 80.6 (45.8 - 87.5)           | 75.0 (49.3 - 87.5) | 64.6 (44.4 - 83.3)    | 87.5 (70.8 - 95.8)    | 66.7 (22.2 - 83.3) | 91.7 (79.2 - 100.0) | .       |
| Min, Max                                                                                | 0.0, 100.0            | 26.3, 100.0                  | 13.8, 100.0        | 0.0, 100.0            | 12.5, 100.0           | 4.2, 87.5          | 52.8, 100.0         | .       |
| How would you rate your ability to have an erection during the last 4 weeks?            |                       |                              |                    |                       |                       |                    |                     | .       |
| Very poor to none                                                                       | 31 (11.6%)            | 0 (0.0%)                     | 7 (8.8%)           | 10 (11.4%)            | 4 (13.3%)             | 10 (24.4%)         | 0 (0.0%)            | 0.0260  |
| Poor                                                                                    | 33 (12.4%)            | 5 (22.7%)                    | 10 (12.5%)         | 9 (10.2%)             | 3 (10.0%)             | 6 (14.6%)          | 0 (0.0%)            | .       |
| Fair                                                                                    | 61 (22.8%)            | 6 (27.3%)                    | 17 (21.3%)         | 24 (27.3%)            | 5 (16.7%)             | 8 (19.5%)          | 1 (16.7%)           | .       |

EPIC-26 results - Brachytherapy

| Statistic Variable or Category                                                      | Brachytherapy (n=271) | Australia/New Zealand (n=22) | Canada (n=83) | Central Europe (n=89) | United Kingdom (n=30) | Spain (n=41) | USA (n=6) | P Value |
|-------------------------------------------------------------------------------------|-----------------------|------------------------------|---------------|-----------------------|-----------------------|--------------|-----------|---------|
| Good                                                                                | 103 (38.6%)           | 6 (27.3%)                    | 31 (38.8%)    | 37 (42.0%)            | 10 (33.3%)            | 17 (41.5%)   | 2 (33.3%) | .       |
| Very good                                                                           | 39 (14.6%)            | 5 (22.7%)                    | 15 (18.8%)    | 8 (9.1%)              | 8 (26.7%)             | 0 (0.0%)     | 3 (50.0%) | .       |
| Missing                                                                             | 4                     |                              | 3             | 1                     |                       |              |           | .       |
| How would you rate your ability to reach orgasm (climax) during the last 4 weeks?   |                       |                              |               |                       |                       |              |           | .       |
| Very poor to none                                                                   | 33 (12.5%)            | 1 (4.5%)                     | 9 (11.3%)     | 10 (11.6%)            | 3 (10.0%)             | 10 (24.4%)   | 0 (0.0%)  | 0.0144  |
| Poor                                                                                | 21 (7.9%)             | 2 (9.1%)                     | 6 (7.5%)      | 7 (8.1%)              | 3 (10.0%)             | 3 (7.3%)     | 0 (0.0%)  | .       |
| Fair                                                                                | 57 (21.5%)            | 6 (27.3%)                    | 18 (22.5%)    | 24 (27.9%)            | 2 (6.7%)              | 6 (14.6%)    | 1 (16.7%) | .       |
| Good                                                                                | 108 (40.8%)           | 7 (31.8%)                    | 29 (36.3%)    | 36 (41.9%)            | 12 (40.0%)            | 22 (53.7%)   | 2 (33.3%) | .       |
| Very good                                                                           | 46 (17.4%)            | 6 (27.3%)                    | 18 (22.5%)    | 9 (10.5%)             | 10 (33.3%)            | 0 (0.0%)     | 3 (50.0%) | .       |
| Missing                                                                             | 6                     |                              | 3             | 3                     |                       |              |           | .       |
| How would you describe the usual quality of your erections during the last 4 weeks? |                       |                              |               |                       |                       |              |           | .       |
| None at all                                                                         | 32 (12.0%)            | 0 (0.0%)                     | 5 (6.3%)      | 14 (16.1%)            | 4 (13.3%)             | 9 (22.0%)    | 0 (0.0%)  | 0.1429  |
| Not firm enough for any sexual activity                                             | 30 (11.3%)            | 3 (13.6%)                    | 11 (13.8%)    | 11 (12.6%)            | 2 (6.7%)              | 3 (7.3%)     | 0 (0.0%)  | .       |
| Firm enough for masturbation and foreplay                                           | 49 (18.4%)            | 5 (22.7%)                    | 17 (21.3%)    | 16 (18.4%)            | 1 (3.3%)              | 9 (22.0%)    | 1 (16.7%) | .       |
| Firm enough for intercourse                                                         | 155 (58.3%)           | 14 (63.6%)                   | 47 (58.8%)    | 46 (52.9%)            | 23 (76.7%)            | 20 (48.8%)   | 5 (83.3%) | .       |
| Missing                                                                             | 5                     |                              | 3             | 2                     |                       |              |           | .       |
| How would you describe the frequency of your erections during the last 4 weeks?     |                       |                              |               |                       |                       |              |           | .       |
| I never had an erection when I wanted one                                           | 37 (14.0%)            | 2 (9.1%)                     | 7 (9.0%)      | 13 (14.9%)            | 4 (13.3%)             | 11 (26.8%)   | 0 (0.0%)  | 0.0073  |
| I had an erection less than half the time I wanted one                              | 30 (11.4%)            | 3 (13.6%)                    | 12 (15.4%)    | 11 (12.6%)            | 1 (3.3%)              | 3 (7.3%)     | 0 (0.0%)  | .       |
| I had an erection about half the time I wanted one                                  | 35 (13.3%)            | 1 (4.5%)                     | 11 (14.1%)    | 19 (21.8%)            | 1 (3.3%)              | 3 (7.3%)     | 0 (0.0%)  | .       |
| I had an erection more than half the time I wanted one                              | 42 (15.9%)            | 6 (27.3%)                    | 12 (15.4%)    | 17 (19.5%)            | 3 (10.0%)             | 2 (4.9%)     | 2 (33.3%) | .       |

EPIC-26 results - Brachytherapy

| Statistic Variable or Category                                                              | Brachytherapy (n=271) | Australia/New Zealand (n=22) | Canada (n=83)        | Central Europe (n=89) | United Kingdom (n=30) | Spain (n=41)        | USA (n=6)           | P Value |
|---------------------------------------------------------------------------------------------|-----------------------|------------------------------|----------------------|-----------------------|-----------------------|---------------------|---------------------|---------|
| I had an erection whenever I wanted one                                                     | 120 (45.5%)           | 10 (45.5%)                   | 36 (46.2%)           | 27 (31.0%)            | 21 (70.0%)            | 22 (53.7%)          | 4 (66.7%)           | .       |
| Missing                                                                                     | 7                     |                              | 5                    | 2                     |                       |                     |                     | .       |
| Overall, how would you rate your ability to function sexually during the last 4 weeks?      |                       |                              |                      |                       |                       |                     |                     | .       |
| Very poor                                                                                   | 32 (12.1%)            | 1 (4.5%)                     | 8 (10.0%)            | 6 (7.0%)              | 5 (16.7%)             | 12 (29.3%)          | 0 (0.0%)            | 0.0024  |
| Poor                                                                                        | 33 (12.5%)            | 2 (9.1%)                     | 10 (12.5%)           | 15 (17.4%)            | 0 (0.0%)              | 6 (14.6%)           | 0 (0.0%)            | .       |
| Fair                                                                                        | 68 (25.7%)            | 6 (27.3%)                    | 19 (23.8%)           | 26 (30.2%)            | 5 (16.7%)             | 11 (26.8%)          | 1 (16.7%)           | .       |
| Good                                                                                        | 91 (34.3%)            | 8 (36.4%)                    | 27 (33.8%)           | 31 (36.0%)            | 11 (36.7%)            | 12 (29.3%)          | 2 (33.3%)           | .       |
| Very good                                                                                   | 41 (15.5%)            | 5 (22.7%)                    | 16 (20.0%)           | 8 (9.3%)              | 9 (30.0%)             | 0 (0.0%)            | 3 (50.0%)           | .       |
| Missing                                                                                     | 6                     |                              | 3                    | 3                     |                       |                     |                     | .       |
| Overall, how big a problem have your sexual functions been for you during the last 4 weeks? |                       |                              |                      |                       |                       |                     |                     | .       |
| No problem                                                                                  | 155 (57.8%)           | 11 (50.0%)                   | 43 (53.1%)           | 50 (56.8%)            | 22 (73.3%)            | 26 (63.4%)          | 3 (50.0%)           | 0.2756  |
| Very small problem                                                                          | 50 (18.7%)            | 4 (18.2%)                    | 20 (24.7%)           | 19 (21.6%)            | 5 (16.7%)             | 0 (0.0%)            | 2 (33.3%)           | .       |
| Small problem                                                                               | 24 (9.0%)             | 2 (9.1%)                     | 9 (11.1%)            | 7 (8.0%)              | 2 (6.7%)              | 4 (9.8%)            | 0 (0.0%)            | .       |
| Moderate problem                                                                            | 36 (13.4%)            | 5 (22.7%)                    | 8 (9.9%)             | 11 (12.5%)            | 1 (3.3%)              | 10 (24.4%)          | 1 (16.7%)           | .       |
| Big problem                                                                                 | 3 (1.1%)              | 0 (0.0%)                     | 1 (1.2%)             | 1 (1.1%)              | 0 (0.0%)              | 1 (2.4%)            | 0 (0.0%)            | .       |
| Missing                                                                                     | 3                     |                              | 2                    | 1                     |                       |                     |                     | .       |
| Hormonal                                                                                    |                       |                              |                      |                       |                       |                     |                     | .       |
| n                                                                                           | 267                   | 22                           | 82                   | 86                    | 30                    | 41                  | 6                   | 0.7590  |
| Mean (SD)                                                                                   | 91.5 (12.41)          | 93.2 (10.30)                 | 92.7 (10.52)         | 92.1 (11.97)          | 90.7 (13.24)          | 87.8 (15.57)        | 87.5 (19.43)        | .       |
| Median (Q1-Q3)                                                                              | 100.0 (85.0 - 100.0)  | 97.5 (90.0 - 100.0)          | 100.0 (90.0 - 100.0) | 100.0 (85.0 - 100.0)  | 97.5 (85.0 - 100.0)   | 90.0 (85.0 - 100.0) | 95.0 (85.0 - 100.0) | .       |
| Min, Max                                                                                    | 40.0, 100.0           | 60.0, 100.0                  | 60.0, 100.0          | 40.0, 100.0           | 45.0, 100.0           | 45.0, 100.0         | 50.0, 100.0         | .       |
| How big a problem during the last 4 weeks, if any, have hot flashes been for you?           |                       |                              |                      |                       |                       |                     |                     | .       |
| No problem                                                                                  | 252 (93.7%)           | 20 (90.9%)                   | 77 (93.9%)           | 82 (93.2%)            | 26 (86.7%)            | 41 (100.0%)         | 6 (100.0%)          | 0.6353  |
| Very small problem                                                                          | 5 (1.9%)              | 1 (4.5%)                     | 2 (2.4%)             | 2 (2.3%)              | 0 (0.0%)              | 0 (0.0%)            | 0 (0.0%)            | .       |

EPIC-26 results - Brachytherapy

| Statistic Variable or Category                                                                     | Brachytherapy (n=271) | Australia/New Zealand (n=22) | Canada (n=83) | Central Europe (n=89) | United Kingdom (n=30) | Spain (n=41) | USA (n=6) | P Value |
|----------------------------------------------------------------------------------------------------|-----------------------|------------------------------|---------------|-----------------------|-----------------------|--------------|-----------|---------|
| Small problem                                                                                      | 7 (2.6%)              | 1 (4.5%)                     | 1 (1.2%)      | 3 (3.4%)              | 2 (6.7%)              | 0 (0.0%)     | 0 (0.0%)  | .       |
| Moderate problem                                                                                   | 5 (1.9%)              | 0 (0.0%)                     | 2 (2.4%)      | 1 (1.1%)              | 2 (6.7%)              | 0 (0.0%)     | 0 (0.0%)  | .       |
| Missing                                                                                            | 2                     |                              | 1             | 1                     |                       |              |           | .       |
| How big a problem during the last 4 weeks, if any, has breast tenderness/enlargement been for you? |                       |                              |               |                       |                       |              |           | .       |
| No problem                                                                                         | 258 (98.9%)           | 22 (100.0%)                  | 81 (98.8%)    | 79 (98.8%)            | 30 (100.0%)           | 41 (100.0%)  | 5 (83.3%) | <.0001  |
| Very small problem                                                                                 | 1 (0.4%)              | 0 (0.0%)                     | 1 (1.2%)      | 0 (0.0%)              | 0 (0.0%)              | 0 (0.0%)     | 0 (0.0%)  | .       |
| Moderate problem                                                                                   | 1 (0.4%)              | 0 (0.0%)                     | 0 (0.0%)      | 0 (0.0%)              | 0 (0.0%)              | 0 (0.0%)     | 1 (16.7%) | .       |
| Big problem                                                                                        | 1 (0.4%)              | 0 (0.0%)                     | 0 (0.0%)      | 1 (1.3%)              | 0 (0.0%)              | 0 (0.0%)     | 0 (0.0%)  | .       |
| Missing                                                                                            | 10                    |                              | 1             | 9                     |                       |              |           | .       |
| How big a problem during the last 4 weeks, if any, has feeling depressed been for you?             |                       |                              |               |                       |                       |              |           | .       |
| No problem                                                                                         | 183 (68.5%)           | 17 (77.3%)                   | 61 (74.4%)    | 61 (70.9%)            | 20 (66.7%)            | 20 (48.8%)   | 4 (66.7%) | <.0001  |
| Very small problem                                                                                 | 32 (12.0%)            | 2 (9.1%)                     | 12 (14.6%)    | 9 (10.5%)             | 8 (26.7%)             | 0 (0.0%)     | 1 (16.7%) | .       |
| Small problem                                                                                      | 28 (10.5%)            | 1 (4.5%)                     | 7 (8.5%)      | 13 (15.1%)            | 0 (0.0%)              | 7 (17.1%)    | 0 (0.0%)  | .       |
| Moderate problem                                                                                   | 14 (5.2%)             | 0 (0.0%)                     | 2 (2.4%)      | 2 (2.3%)              | 2 (6.7%)              | 7 (17.1%)    | 1 (16.7%) | .       |
| Big problem                                                                                        | 10 (3.7%)             | 2 (9.1%)                     | 0 (0.0%)      | 1 (1.2%)              | 0 (0.0%)              | 7 (17.1%)    | 0 (0.0%)  | .       |
| Missing                                                                                            | 4                     |                              | 1             | 3                     |                       |              |           | .       |
| How big a problem during the last 4 weeks, if any, has lack of energy been for you?                |                       |                              |               |                       |                       |              |           | .       |
| No problem                                                                                         | 176 (65.7%)           | 13 (59.1%)                   | 54 (65.9%)    | 55 (63.2%)            | 19 (63.3%)            | 32 (78.0%)   | 3 (50.0%) | 0.0151  |
| Very small problem                                                                                 | 41 (15.3%)            | 7 (31.8%)                    | 14 (17.1%)    | 16 (18.4%)            | 3 (10.0%)             | 0 (0.0%)     | 1 (16.7%) | .       |
| Small problem                                                                                      | 30 (11.2%)            | 1 (4.5%)                     | 11 (13.4%)    | 12 (13.8%)            | 4 (13.3%)             | 1 (2.4%)     | 1 (16.7%) | .       |
| Moderate problem                                                                                   | 11 (4.1%)             | 1 (4.5%)                     | 2 (2.4%)      | 2 (2.3%)              | 3 (10.0%)             | 3 (7.3%)     | 0 (0.0%)  | .       |
| Big problem                                                                                        | 10 (3.7%)             | 0 (0.0%)                     | 1 (1.2%)      | 2 (2.3%)              | 1 (3.3%)              | 5 (12.2%)    | 1 (16.7%) | .       |
| Missing                                                                                            | 3                     |                              | 1             | 2                     |                       |              |           | .       |

EPIC-26 results - Brachytherapy

| <b>Statistic Variable or Category</b>                                                      | <b>Brachytherapy (n=271)</b> | <b>Australia/New Zealand (n=22)</b> | <b>Canada (n=83)</b> | <b>Central Europe (n=89)</b> | <b>United Kingdom (n=30)</b> | <b>Spain (n=41)</b> | <b>USA (n=6)</b> | <b>P Value</b> |
|--------------------------------------------------------------------------------------------|------------------------------|-------------------------------------|----------------------|------------------------------|------------------------------|---------------------|------------------|----------------|
| How big a problem during the last 4 weeks, if any, has change in body weight been for you? |                              |                                     |                      |                              |                              |                     |                  | .              |
| No problem                                                                                 | 228 (85.4%)                  | 19 (86.4%)                          | 66 (80.5%)           | 73 (84.9%)                   | 26 (86.7%)                   | 39 (95.1%)          | 5 (83.3%)        | 0.5935         |
| Very small problem                                                                         | 21 (7.9%)                    | 3 (13.6%)                           | 7 (8.5%)             | 9 (10.5%)                    | 1 (3.3%)                     | 0 (0.0%)            | 1 (16.7%)        | .              |
| Small problem                                                                              | 8 (3.0%)                     | 0 (0.0%)                            | 4 (4.9%)             | 2 (2.3%)                     | 2 (6.7%)                     | 0 (0.0%)            | 0 (0.0%)         | .              |
| Moderate problem                                                                           | 9 (3.4%)                     | 0 (0.0%)                            | 5 (6.1%)             | 1 (1.2%)                     | 1 (3.3%)                     | 2 (4.9%)            | 0 (0.0%)         | .              |
| Big problem                                                                                | 1 (0.4%)                     | 0 (0.0%)                            | 0 (0.0%)             | 1 (1.2%)                     | 0 (0.0%)                     | 0 (0.0%)            | 0 (0.0%)         | .              |
| Missing                                                                                    | 4                            |                                     | 1                    | 3                            |                              |                     |                  | .              |

EPIC-26 results - Active Surveillance

| Statistic Variable or Category                                                                         | Active Surveillance (n=1081) | Australia/New Zealand (n=222) | Canada (n=409)       | Central Europe (n=116) | United Kingdom (n=47) | Italy (n=39)          | USA (n=248)          | P Value |
|--------------------------------------------------------------------------------------------------------|------------------------------|-------------------------------|----------------------|------------------------|-----------------------|-----------------------|----------------------|---------|
| Urinary Incontinence                                                                                   |                              |                               |                      |                        |                       |                       |                      | .       |
| n                                                                                                      | 1035                         | 210                           | 397                  | 111                    | 46                    | 37                    | 234                  | 0.0006  |
| Mean (SD)                                                                                              | 91.6 (15.45)                 | 91.7 (14.81)                  | 93.1 (13.50)         | 86.6 (20.71)           | 85.9 (18.36)          | 96.7 (7.28)           | 91.7 (15.86)         | .       |
| Median (Q1-Q3)                                                                                         | 100.0 (87.5 - 100.0)         | 100.0 (85.5 - 100.0)          | 100.0 (91.8 - 100.0) | 100.0 (79.3 - 100.0)   | 91.8 (73.0 - 100.0)   | 100.0 (100.0 - 100.0) | 100.0 (91.8 - 100.0) | .       |
| Min, Max                                                                                               | 8.3, 100.0                   | 22.8, 100.0                   | 22.8, 100.0          | 8.3, 100.0             | 39.5, 100.0           | 75.0, 100.0           | 8.3, 100.0           | .       |
| Over the past 4 weeks, how often have you leaked urine?                                                |                              |                               |                      |                        |                       |                       |                      | .       |
| More than once a day                                                                                   | 54 (5.0%)                    | 11 (5.0%)                     | 18 (4.4%)            | 5 (4.3%)               | 6 (12.8%)             | 0 (0.0%)              | 14 (5.7%)            | 0.0365  |
| About once a day                                                                                       | 43 (4.0%)                    | 13 (5.9%)                     | 12 (2.9%)            | 8 (7.0%)               | 3 (6.4%)              | 0 (0.0%)              | 7 (2.8%)             | .       |
| More than once a week                                                                                  | 41 (3.8%)                    | 9 (4.1%)                      | 13 (3.2%)            | 5 (4.3%)               | 3 (6.4%)              | 0 (0.0%)              | 11 (4.5%)            | .       |
| About once a week                                                                                      | 70 (6.5%)                    | 17 (7.8%)                     | 30 (7.4%)            | 6 (5.2%)               | 6 (12.8%)             | 0 (0.0%)              | 11 (4.5%)            | .       |
| Rarely or never                                                                                        | 865 (80.6%)                  | 169 (77.2%)                   | 334 (82.1%)          | 91 (79.1%)             | 29 (61.7%)            | 39 (100.0%)           | 203 (82.5%)          | .       |
| Missing                                                                                                | 8                            | 3                             | 2                    | 1                      |                       |                       | 2                    | .       |
| Which of the following best describes your urinary control during the last 4 weeks?                    |                              |                               |                      |                        |                       |                       |                      | .       |
| No urinary control whatsoever                                                                          | 12 (1.1%)                    | 1 (0.5%)                      | 2 (0.5%)             | 3 (2.6%)               | 0 (0.0%)              | 2 (5.1%)              | 4 (1.6%)             | 0.0005  |
| Frequent dribbling                                                                                     | 36 (3.4%)                    | 6 (2.7%)                      | 11 (2.7%)            | 7 (6.1%)               | 3 (6.4%)              | 1 (2.6%)              | 8 (3.3%)             | .       |
| Occasional dribbling                                                                                   | 263 (24.5%)                  | 56 (25.6%)                    | 91 (22.4%)           | 36 (31.3%)             | 22 (46.8%)            | 4 (10.3%)             | 54 (22.0%)           | .       |
| Total control                                                                                          | 762 (71.0%)                  | 156 (71.2%)                   | 303 (74.4%)          | 69 (60.0%)             | 22 (46.8%)            | 32 (82.1%)            | 180 (73.2%)          | .       |
| Missing                                                                                                | 8                            | 3                             | 2                    | 1                      |                       |                       | 2                    | .       |
| How many pads or adult diapers per day did you usually use to control leakage during the last 4 weeks? |                              |                               |                      |                        |                       |                       |                      | .       |
| None                                                                                                   | 1023 (96.1%)                 | 215 (97.3%)                   | 392 (98.2%)          | 95 (82.6%)             | 44 (95.7%)            | 39 (100.0%)           | 238 (97.5%)          | <.0001  |
| 1 pad per day                                                                                          | 28 (2.6%)                    | 5 (2.3%)                      | 5 (1.3%)             | 15 (13.0%)             | 2 (4.3%)              | 0 (0.0%)              | 1 (0.4%)             | .       |
| 2 pads per day                                                                                         | 8 (0.8%)                     | 1 (0.5%)                      | 1 (0.3%)             | 2 (1.7%)               | 0 (0.0%)              | 0 (0.0%)              | 4 (1.6%)             | .       |
| 3 or more pads per day                                                                                 | 5 (0.5%)                     | 0 (0.0%)                      | 1 (0.3%)             | 3 (2.6%)               | 0 (0.0%)              | 0 (0.0%)              | 1 (0.4%)             | .       |
| Missing                                                                                                | 17                           | 1                             | 10                   | 1                      | 1                     |                       | 4                    | .       |

EPIC-26 results - Active Surveillance

| Statistic Variable or Category                                                                    | Active Surveillance (n=1081) | Australia/New Zealand (n=222) | Canada (n=409)      | Central Europe (n=116) | United Kingdom (n=47) | Italy (n=39)       | USA (n=248)         | P Value |
|---------------------------------------------------------------------------------------------------|------------------------------|-------------------------------|---------------------|------------------------|-----------------------|--------------------|---------------------|---------|
| How big a problem, if any, has dripping or leaking urine been for you during the last 4 weeks?    |                              |                               |                     |                        |                       |                    |                     | .       |
| No problem                                                                                        | 785 (74.5%)                  | 157 (73.7%)                   | 310 (76.2%)         | 73 (64.6%)             | 31 (66.0%)            | 33 (89.2%)         | 181 (76.7%)         | 0.0005  |
| Very small problem                                                                                | 173 (16.4%)                  | 42 (19.7%)                    | 68 (16.7%)          | 17 (15.0%)             | 8 (17.0%)             | 3 (8.1%)           | 35 (14.8%)          | .       |
| Small problem                                                                                     | 64 (6.1%)                    | 6 (2.8%)                      | 23 (5.7%)           | 15 (13.3%)             | 5 (10.6%)             | 1 (2.7%)           | 14 (5.9%)           | .       |
| Moderate problem                                                                                  | 24 (2.3%)                    | 7 (3.3%)                      | 6 (1.5%)            | 4 (3.5%)               | 3 (6.4%)              | 0 (0.0%)           | 4 (1.7%)            | .       |
| Big problem                                                                                       | 7 (0.7%)                     | 1 (0.5%)                      | 0 (0.0%)            | 4 (3.5%)               | 0 (0.0%)              | 0 (0.0%)           | 2 (0.8%)            | .       |
| Missing                                                                                           | 28                           | 9                             | 2                   | 3                      |                       | 2                  | 12                  | .       |
| Urinary Irritative/Obst.                                                                          |                              |                               |                     |                        |                       |                    |                     | .       |
| n                                                                                                 | 1030                         | 210                           | 404                 | 107                    | 46                    | 37                 | 226                 | 0.0005  |
| Mean (SD)                                                                                         | 85.6 (15.33)                 | 84.6 (15.70)                  | 87.8 (14.10)        | 82.1 (18.33)           | 79.3 (17.17)          | 84.1 (16.04)       | 85.9 (14.42)        | .       |
| Median (Q1-Q3)                                                                                    | 87.5 (75.0 - 100.0)          | 87.5 (75.0 - 100.0)           | 93.8 (81.3 - 100.0) | 87.5 (75.0 - 93.8)     | 81.3 (68.8 - 93.8)    | 87.5 (81.3 - 93.8) | 87.5 (75.0 - 100.0) | .       |
| Min, Max                                                                                          | 6.3, 100.0                   | 18.8, 100.0                   | 25.0, 100.0         | 6.3, 100.0             | 31.3, 100.0           | 43.8, 100.0        | 31.3, 100.0         | .       |
| How big a problem, if any, has pain or burning on urination been for you during the last 4 weeks? |                              |                               |                     |                        |                       |                    |                     | .       |
| No problem                                                                                        | 900 (86.1%)                  | 186 (88.2%)                   | 353 (86.7%)         | 88 (80.0%)             | 40 (85.1%)            | 30 (81.1%)         | 203 (87.1%)         | 0.8548  |
| Very small problem                                                                                | 88 (8.4%)                    | 12 (5.7%)                     | 37 (9.1%)           | 14 (12.7%)             | 4 (8.5%)              | 4 (10.8%)          | 17 (7.3%)           | .       |
| Small problem                                                                                     | 33 (3.2%)                    | 7 (3.3%)                      | 10 (2.5%)           | 4 (3.6%)               | 1 (2.1%)              | 2 (5.4%)           | 9 (3.9%)            | .       |
| Moderate problem                                                                                  | 20 (1.9%)                    | 5 (2.4%)                      | 5 (1.2%)            | 4 (3.6%)               | 2 (4.3%)              | 1 (2.7%)           | 3 (1.3%)            | .       |
| Big problem                                                                                       | 4 (0.4%)                     | 1 (0.5%)                      | 2 (0.5%)            | 0 (0.0%)               | 0 (0.0%)              | 0 (0.0%)           | 1 (0.4%)            | .       |
| Missing                                                                                           | 36                           | 11                            | 2                   | 6                      |                       | 2                  | 15                  | .       |
| How big a problem, if any, has bleeding with urination been for you during the last 4 weeks?      |                              |                               |                     |                        |                       |                    |                     | .       |
| No problem                                                                                        | 945 (90.5%)                  | 188 (88.3%)                   | 379 (93.3%)         | 95 (86.4%)             | 39 (84.8%)            | 37 (100.0%)        | 207 (89.2%)         | 0.0086  |
| Very small problem                                                                                | 61 (5.8%)                    | 18 (8.5%)                     | 19 (4.7%)           | 6 (5.5%)               | 2 (4.3%)              | 0 (0.0%)           | 16 (6.9%)           | .       |
| Small problem                                                                                     | 24 (2.3%)                    | 6 (2.8%)                      | 4 (1.0%)            | 5 (4.5%)               | 2 (4.3%)              | 0 (0.0%)           | 7 (3.0%)            | .       |
| Moderate problem                                                                                  | 13 (1.2%)                    | 1 (0.5%)                      | 4 (1.0%)            | 3 (2.7%)               | 3 (6.5%)              | 0 (0.0%)           | 2 (0.9%)            | .       |
| Big problem                                                                                       | 1 (0.1%)                     | 0 (0.0%)                      | 0 (0.0%)            | 1 (0.9%)               | 0 (0.0%)              | 0 (0.0%)           | 0 (0.0%)            | .       |



EPIC-26 results - Active Surveillance

| Statistic Variable or Category                                                                                 | Active Surveillance (n=1081) | Australia/New Zealand (n=222) | Canada (n=409) | Central Europe (n=116) | United Kingdom (n=47) | Italy (n=39) | USA (n=248) | P Value |
|----------------------------------------------------------------------------------------------------------------|------------------------------|-------------------------------|----------------|------------------------|-----------------------|--------------|-------------|---------|
| Missing                                                                                                        | 37                           | 9                             | 3              | 6                      | 1                     | 2            | 16          | .       |
| How big a problem, if any, has weak urine stream been for you during the last 4 weeks?                         |                              |                               |                |                        |                       |              |             | .       |
| No problem                                                                                                     | 493 (46.8%)                  | 85 (39.4%)                    | 209 (51.4%)    | 45 (40.2%)             | 17 (36.2%)            | 14 (36.8%)   | 123 (52.8%) | 0.0005  |
| Very small problem                                                                                             | 271 (25.7%)                  | 65 (30.1%)                    | 104 (25.6%)    | 31 (27.7%)             | 12 (25.5%)            | 13 (34.2%)   | 46 (19.7%)  | .       |
| Small problem                                                                                                  | 153 (14.5%)                  | 35 (16.2%)                    | 52 (12.8%)     | 13 (11.6%)             | 6 (12.8%)             | 6 (15.8%)    | 41 (17.6%)  | .       |
| Moderate problem                                                                                               | 115 (10.9%)                  | 28 (13.0%)                    | 35 (8.6%)      | 15 (13.4%)             | 11 (23.4%)            | 4 (10.5%)    | 22 (9.4%)   | .       |
| Big problem                                                                                                    | 21 (2.0%)                    | 3 (1.4%)                      | 7 (1.7%)       | 8 (7.1%)               | 1 (2.1%)              | 1 (2.6%)     | 1 (0.4%)    | .       |
| Missing                                                                                                        | 28                           | 6                             | 2              | 4                      |                       | 1            | 15          | .       |
| How big a problem, if any, has need to urinate frequently during the day been for you during the last 4 weeks? |                              |                               |                |                        |                       |              |             | .       |
| No problem                                                                                                     | 483 (45.6%)                  | 97 (44.5%)                    | 214 (52.3%)    | 44 (39.3%)             | 15 (31.9%)            | 13 (35.1%)   | 100 (42.2%) | 0.0357  |
| Very small problem                                                                                             | 244 (23.0%)                  | 52 (23.9%)                    | 95 (23.2%)     | 26 (23.2%)             | 10 (21.3%)            | 11 (29.7%)   | 50 (21.1%)  | .       |
| Small problem                                                                                                  | 179 (16.9%)                  | 37 (17.0%)                    | 54 (13.2%)     | 19 (17.0%)             | 12 (25.5%)            | 8 (21.6%)    | 49 (20.7%)  | .       |
| Moderate problem                                                                                               | 123 (11.6%)                  | 28 (12.8%)                    | 37 (9.0%)      | 17 (15.2%)             | 9 (19.1%)             | 2 (5.4%)     | 30 (12.7%)  | .       |
| Big problem                                                                                                    | 31 (2.9%)                    | 4 (1.8%)                      | 9 (2.2%)       | 6 (5.4%)               | 1 (2.1%)              | 3 (8.1%)     | 8 (3.4%)    | .       |
| Missing                                                                                                        | 21                           | 4                             |                | 4                      |                       | 2            | 11          | .       |
| Overall how big a problem has your urinary function been for you during the last 4 weeks?                      |                              |                               |                |                        |                       |              |             | .       |
| No problem                                                                                                     | 571 (53.5%)                  | 105 (48.2%)                   | 236 (57.8%)    | 54 (48.6%)             | 16 (34.0%)            | 22 (56.4%)   | 138 (56.3%) | 0.0063  |
| Very small problem                                                                                             | 250 (23.4%)                  | 66 (30.3%)                    | 86 (21.1%)     | 22 (19.8%)             | 12 (25.5%)            | 7 (17.9%)    | 57 (23.3%)  | .       |
| Small problem                                                                                                  | 139 (13.0%)                  | 25 (11.5%)                    | 55 (13.5%)     | 15 (13.5%)             | 9 (19.1%)             | 5 (12.8%)    | 30 (12.2%)  | .       |
| Moderate problem                                                                                               | 92 (8.6%)                    | 20 (9.2%)                     | 26 (6.4%)      | 16 (14.4%)             | 10 (21.3%)            | 5 (12.8%)    | 15 (6.1%)   | .       |
| Big problem                                                                                                    | 16 (1.5%)                    | 2 (0.9%)                      | 5 (1.2%)       | 4 (3.6%)               | 0 (0.0%)              | 0 (0.0%)     | 5 (2.0%)    | .       |
| Missing                                                                                                        | 13                           | 4                             | 1              | 5                      |                       |              | 3           | .       |
| Bowel                                                                                                          |                              |                               |                |                        |                       |              |             | .       |
| n                                                                                                              | 1049                         | 215                           | 408            | 112                    | 45                    | 33           | 236         | <.0001  |
| Mean (SD)                                                                                                      | 95.2 (9.79)                  | 94.2 (10.43)                  | 96.1 (9.16)    | 95.1 (9.16)            | 92.1 (12.35)          | 92.6 (11.82) | 95.4 (9.52) | .       |



EPIC-26 results - Active Surveillance

| Statistic Variable or Category                                                          | Active Surveillance (n=1081) | Australia/New Zealand (n=222) | Canada (n=409)     | Central Europe (n=116) | United Kingdom (n=47) | Italy (n=39)       | USA (n=248)        | P Value |
|-----------------------------------------------------------------------------------------|------------------------------|-------------------------------|--------------------|------------------------|-----------------------|--------------------|--------------------|---------|
| No problem                                                                              | 1010 (96.1%)                 | 204 (94.9%)                   | 393 (96.3%)        | 109 (96.5%)            | 44 (97.8%)            | 32 (97.0%)         | 228 (96.2%)        | 0.0002  |
| Very small problem                                                                      | 29 (2.8%)                    | 8 (3.7%)                      | 8 (2.0%)           | 4 (3.5%)               | 0 (0.0%)              | 0 (0.0%)           | 9 (3.8%)           | .       |
| Small problem                                                                           | 11 (1.0%)                    | 3 (1.4%)                      | 7 (1.7%)           | 0 (0.0%)               | 1 (2.2%)              | 0 (0.0%)           | 0 (0.0%)           | .       |
| Moderate problem                                                                        | 1 (0.1%)                     | 0 (0.0%)                      | 0 (0.0%)           | 0 (0.0%)               | 0 (0.0%)              | 1 (3.0%)           | 0 (0.0%)           | .       |
| Missing                                                                                 | 30                           | 7                             | 1                  | 3                      | 2                     | 6                  | 11                 | .       |
| How big a problem, if any, has abdominal/pelvic/rectal pain been for you?               |                              |                               |                    |                        |                       |                    |                    |         |
| No problem                                                                              | 902 (85.7%)                  | 169 (77.9%)                   | 368 (90.4%)        | 90 (79.6%)             | 37 (78.7%)            | 24 (72.7%)         | 214 (90.7%)        | <.0001  |
| Very small problem                                                                      | 91 (8.6%)                    | 33 (15.2%)                    | 28 (6.9%)          | 15 (13.3%)             | 5 (10.6%)             | 4 (12.1%)          | 6 (2.5%)           | .       |
| Small problem                                                                           | 42 (4.0%)                    | 11 (5.1%)                     | 7 (1.7%)           | 6 (5.3%)               | 3 (6.4%)              | 4 (12.1%)          | 11 (4.7%)          | .       |
| Moderate problem                                                                        | 15 (1.4%)                    | 2 (0.9%)                      | 4 (1.0%)           | 2 (1.8%)               | 2 (4.3%)              | 1 (3.0%)           | 4 (1.7%)           | .       |
| Big problem                                                                             | 3 (0.3%)                     | 2 (0.9%)                      | 0 (0.0%)           | 0 (0.0%)               | 0 (0.0%)              | 0 (0.0%)           | 1 (0.4%)           | .       |
| Missing                                                                                 | 28                           | 5                             | 2                  | 3                      |                       | 6                  | 12                 | .       |
| Overall, how big a problem have your bowel habits been for you during the last 4 weeks? |                              |                               |                    |                        |                       |                    |                    |         |
| No problem                                                                              | 875 (81.8%)                  | 165 (76.7%)                   | 356 (87.0%)        | 93 (80.9%)             | 33 (70.2%)            | 30 (76.9%)         | 198 (80.8%)        | 0.0285  |
| Very small problem                                                                      | 133 (12.4%)                  | 35 (16.3%)                    | 36 (8.8%)          | 15 (13.0%)             | 9 (19.1%)             | 4 (10.3%)          | 34 (13.9%)         | .       |
| Small problem                                                                           | 39 (3.6%)                    | 9 (4.2%)                      | 11 (2.7%)          | 5 (4.3%)               | 2 (4.3%)              | 2 (5.1%)           | 10 (4.1%)          | .       |
| Moderate problem                                                                        | 19 (1.8%)                    | 4 (1.9%)                      | 6 (1.5%)           | 1 (0.9%)               | 3 (6.4%)              | 3 (7.7%)           | 2 (0.8%)           | .       |
| Big problem                                                                             | 4 (0.4%)                     | 2 (0.9%)                      | 0 (0.0%)           | 1 (0.9%)               | 0 (0.0%)              | 0 (0.0%)           | 1 (0.4%)           | .       |
| Missing                                                                                 | 11                           | 7                             |                    | 1                      |                       |                    | 3                  | .       |
| Sexual                                                                                  |                              |                               |                    |                        |                       |                    |                    |         |
| n                                                                                       | 1014                         | 214                           | 386                | 108                    | 47                    | 35                 | 224                | 0.0034  |
| Mean (SD)                                                                               | 64.7 (29.53)                 | 65.3 (30.06)                  | 68.2 (27.07)       | 58.3 (28.06)           | 56.2 (28.89)          | 59.2 (32.70)       | 63.9 (32.51)       | .       |
| Median (Q1-Q3)                                                                          | 70.8 (44.5 - 87.5)           | 70.8 (46.6 - 87.5)            | 75.0 (48.7 - 87.5) | 61.9 (40.2 - 79.2)     | 57.0 (32.0 - 79.2)    | 70.8 (25.0 - 87.5) | 70.8 (38.1 - 91.7) | .       |
| Min, Max                                                                                | 0.0, 100.0                   | 0.0, 100.0                    | 0.0, 100.0         | 0.0, 100.0             | 4.2, 100.0            | 0.0, 100.0         | 0.0, 100.0         | .       |

EPIC-26 results - Active Surveillance

| Statistic Variable or Category                                                      | Active Surveillance (n=1081) | Australia/New Zealand (n=222) | Canada (n=409) | Central Europe (n=116) | United Kingdom (n=47) | Italy (n=39) | USA (n=248) | P Value |
|-------------------------------------------------------------------------------------|------------------------------|-------------------------------|----------------|------------------------|-----------------------|--------------|-------------|---------|
| How would you rate your ability to have an erection during the last 4 weeks?        |                              |                               |                |                        |                       |              |             | .       |
| Very poor to none                                                                   | 153 (14.6%)                  | 27 (12.5%)                    | 41 (10.3%)     | 20 (18.3%)             | 9 (19.1%)             | 11 (28.9%)   | 45 (18.9%)  | <.0001  |
| Poor                                                                                | 133 (12.7%)                  | 32 (14.8%)                    | 52 (13.1%)     | 7 (6.4%)               | 7 (14.9%)             | 3 (7.9%)     | 32 (13.4%)  | .       |
| Fair                                                                                | 240 (23.0%)                  | 44 (20.4%)                    | 80 (20.2%)     | 39 (35.8%)             | 17 (36.2%)            | 8 (21.1%)    | 52 (21.8%)  | .       |
| Good                                                                                | 324 (31.0%)                  | 67 (31.0%)                    | 154 (38.8%)    | 31 (28.4%)             | 11 (23.4%)            | 11 (28.9%)   | 50 (21.0%)  | .       |
| Very good                                                                           | 195 (18.7%)                  | 46 (21.3%)                    | 70 (17.6%)     | 12 (11.0%)             | 3 (6.4%)              | 5 (13.2%)    | 59 (24.8%)  | .       |
| Missing                                                                             | 36                           | 6                             | 12             | 7                      |                       | 1            | 10          | .       |
| How would you rate your ability to reach orgasm (climax) during the last 4 weeks?   |                              |                               |                |                        |                       |              |             | .       |
| Very poor to none                                                                   | 139 (13.6%)                  | 29 (13.7%)                    | 35 (8.9%)      | 16 (15.1%)             | 9 (19.1%)             | 9 (25.0%)    | 41 (18.1%)  | <.0001  |
| Poor                                                                                | 108 (10.6%)                  | 19 (9.0%)                     | 45 (11.5%)     | 10 (9.4%)              | 7 (14.9%)             | 5 (13.9%)    | 22 (9.7%)   | .       |
| Fair                                                                                | 199 (19.5%)                  | 47 (22.3%)                    | 75 (19.1%)     | 31 (29.2%)             | 14 (29.8%)            | 7 (19.4%)    | 25 (11.0%)  | .       |
| Good                                                                                | 336 (32.9%)                  | 69 (32.7%)                    | 154 (39.2%)    | 33 (31.1%)             | 8 (17.0%)             | 10 (27.8%)   | 62 (27.3%)  | .       |
| Very good                                                                           | 238 (23.3%)                  | 47 (22.3%)                    | 84 (21.4%)     | 16 (15.1%)             | 9 (19.1%)             | 5 (13.9%)    | 77 (33.9%)  | .       |
| Missing                                                                             | 61                           | 11                            | 16             | 10                     |                       | 3            | 21          | .       |
| How would you describe the usual quality of your erections during the last 4 weeks? |                              |                               |                |                        |                       |              |             | .       |
| None at all                                                                         | 123 (12.0%)                  | 29 (13.6%)                    | 24 (6.2%)      | 20 (18.2%)             | 6 (12.8%)             | 9 (23.7%)    | 35 (15.1%)  | 0.0002  |
| Not firm enough for any sexual activity                                             | 124 (12.1%)                  | 20 (9.3%)                     | 52 (13.4%)     | 15 (13.6%)             | 8 (17.0%)             | 2 (5.3%)     | 27 (11.6%)  | .       |
| Firm enough for masturbation and foreplay                                           | 176 (17.1%)                  | 35 (16.4%)                    | 79 (20.4%)     | 19 (17.3%)             | 13 (27.7%)            | 2 (5.3%)     | 28 (12.1%)  | .       |
| Firm enough for intercourse                                                         | 605 (58.9%)                  | 130 (60.7%)                   | 232 (59.9%)    | 56 (50.9%)             | 20 (42.6%)            | 25 (65.8%)   | 142 (61.2%) | .       |
| Missing                                                                             | 53                           | 8                             | 22             | 6                      |                       | 1            | 16          | .       |
| How would you describe the frequency of your erections during the last 4 weeks?     |                              |                               |                |                        |                       |              |             | .       |
| I never had an erection when I wanted one                                           | 141 (14.0%)                  | 32 (15.0%)                    | 37 (9.7%)      | 20 (18.3%)             | 7 (14.9%)             | 8 (22.9%)    | 37 (16.7%)  | 0.0206  |

EPIC-26 results - Active Surveillance

| Statistic Variable or Category                                                              | Active Surveillance (n=1081) | Australia/New Zealand (n=222) | Canada (n=409)       | Central Europe (n=116) | United Kingdom (n=47) | Italy (n=39)         | USA (n=248)         | P Value |
|---------------------------------------------------------------------------------------------|------------------------------|-------------------------------|----------------------|------------------------|-----------------------|----------------------|---------------------|---------|
| I had an erection less than half the time I wanted one                                      | 111 (11.0%)                  | 23 (10.7%)                    | 40 (10.5%)           | 15 (13.8%)             | 6 (12.8%)             | 3 (8.6%)             | 24 (10.9%)          | .       |
| I had an erection about half the time I wanted one                                          | 135 (13.4%)                  | 24 (11.2%)                    | 51 (13.4%)           | 23 (21.1%)             | 9 (19.1%)             | 2 (5.7%)             | 26 (11.8%)          | .       |
| I had an erection more than half the time I wanted one                                      | 181 (18.0%)                  | 46 (21.5%)                    | 66 (17.3%)           | 23 (21.1%)             | 7 (14.9%)             | 5 (14.3%)            | 34 (15.4%)          | .       |
| I had an erection whenever I wanted one                                                     | 440 (43.7%)                  | 89 (41.6%)                    | 188 (49.2%)          | 28 (25.7%)             | 18 (38.3%)            | 17 (48.6%)           | 100 (45.2%)         | .       |
| Missing                                                                                     | 73                           | 8                             | 27                   | 7                      |                       | 4                    | 27                  | .       |
| Overall, how would you rate your ability to function sexually during the last 4 weeks?      |                              |                               |                      |                        |                       |                      |                     | .       |
| Very poor                                                                                   | 154 (15.1%)                  | 31 (14.4%)                    | 42 (10.8%)           | 18 (16.7%)             | 9 (19.6%)             | 10 (28.6%)           | 44 (19.6%)          | 0.0001  |
| Poor                                                                                        | 123 (12.1%)                  | 29 (13.4%)                    | 47 (12.1%)           | 14 (13.0%)             | 8 (17.4%)             | 1 (2.9%)             | 24 (10.7%)          | .       |
| Fair                                                                                        | 226 (22.2%)                  | 42 (19.4%)                    | 77 (19.7%)           | 37 (34.3%)             | 14 (30.4%)            | 8 (22.9%)            | 48 (21.3%)          | .       |
| Good                                                                                        | 318 (31.2%)                  | 71 (32.9%)                    | 146 (37.4%)          | 25 (23.1%)             | 12 (26.1%)            | 12 (34.3%)           | 52 (23.1%)          | .       |
| Very good                                                                                   | 199 (19.5%)                  | 43 (19.9%)                    | 78 (20.0%)           | 14 (13.0%)             | 3 (6.5%)              | 4 (11.4%)            | 57 (25.3%)          | .       |
| Missing                                                                                     | 61                           | 6                             | 19                   | 8                      | 1                     | 4                    | 23                  | .       |
| Overall, how big a problem have your sexual functions been for you during the last 4 weeks? |                              |                               |                      |                        |                       |                      |                     | .       |
| No problem                                                                                  | 514 (50.3%)                  | 116 (54.0%)                   | 216 (55.5%)          | 37 (33.3%)             | 18 (38.3%)            | 21 (60.0%)           | 106 (47.3%)         | 0.0004  |
| Very small problem                                                                          | 150 (14.7%)                  | 32 (14.9%)                    | 49 (12.6%)           | 25 (22.5%)             | 10 (21.3%)            | 4 (11.4%)            | 30 (13.4%)          | .       |
| Small problem                                                                               | 171 (16.7%)                  | 29 (13.5%)                    | 64 (16.5%)           | 26 (23.4%)             | 9 (19.1%)             | 1 (2.9%)             | 42 (18.8%)          | .       |
| Moderate problem                                                                            | 105 (10.3%)                  | 23 (10.7%)                    | 33 (8.5%)            | 20 (18.0%)             | 4 (8.5%)              | 3 (8.6%)             | 22 (9.8%)           | .       |
| Big problem                                                                                 | 81 (7.9%)                    | 15 (7.0%)                     | 27 (6.9%)            | 3 (2.7%)               | 6 (12.8%)             | 6 (17.1%)            | 24 (10.7%)          | .       |
| Missing                                                                                     | 60                           | 7                             | 20                   | 5                      |                       | 4                    | 24                  | .       |
| Hormonal                                                                                    |                              |                               |                      |                        |                       |                      |                     | .       |
| n                                                                                           | 1038                         | 213                           | 406                  | 113                    | 47                    | 30                   | 229                 | <.0001  |
| Mean (SD)                                                                                   | 92.8 (10.72)                 | 93.3 (9.18)                   | 94.9 (8.61)          | 87.8 (13.78)           | 92.9 (7.85)           | 92.0 (14.83)         | 91.0 (12.45)        | .       |
| Median (Q1-Q3)                                                                              | 100.0 (90.0 - 100.0)         | 95.0 (90.0 - 100.0)           | 100.0 (95.0 - 100.0) | 90.0 (80.0 - 100.0)    | 95.0 (90.0 - 100.0)   | 100.0 (90.0 - 100.0) | 95.0 (87.5 - 100.0) | .       |
| Min, Max                                                                                    | 37.5, 100.0                  | 60.0, 100.0                   | 50.0, 100.0          | 40.0, 100.0            | 70.0, 100.0           | 40.0, 100.0          | 37.5, 100.0         | .       |

EPIC-26 results - Active Surveillance

| Statistic Variable or Category                                                                     | Active Surveillance (n=1081) | Australia/New Zealand (n=222) | Canada (n=409) | Central Europe (n=116) | United Kingdom (n=47) | Italy (n=39) | USA (n=248) | P Value |
|----------------------------------------------------------------------------------------------------|------------------------------|-------------------------------|----------------|------------------------|-----------------------|--------------|-------------|---------|
| How big a problem during the last 4 weeks, if any, have hot flashes been for you?                  |                              |                               |                |                        |                       |              |             | .       |
| No problem                                                                                         | 978 (94.1%)                  | 200 (93.9%)                   | 388 (96.0%)    | 93 (81.6%)             | 45 (95.7%)            | 31 (100.0%)  | 221 (96.1%) | 0.0010  |
| Very small problem                                                                                 | 34 (3.3%)                    | 5 (2.3%)                      | 11 (2.7%)      | 13 (11.4%)             | 2 (4.3%)              | 0 (0.0%)     | 3 (1.3%)    | .       |
| Small problem                                                                                      | 20 (1.9%)                    | 6 (2.8%)                      | 4 (1.0%)       | 6 (5.3%)               | 0 (0.0%)              | 0 (0.0%)     | 4 (1.7%)    | .       |
| Moderate problem                                                                                   | 4 (0.4%)                     | 1 (0.5%)                      | 1 (0.2%)       | 1 (0.9%)               | 0 (0.0%)              | 0 (0.0%)     | 1 (0.4%)    | .       |
| Big problem                                                                                        | 3 (0.3%)                     | 1 (0.5%)                      | 0 (0.0%)       | 1 (0.9%)               | 0 (0.0%)              | 0 (0.0%)     | 1 (0.4%)    | .       |
| Missing                                                                                            | 42                           | 9                             | 5              | 2                      |                       | 8            | 18          | .       |
| How big a problem during the last 4 weeks, if any, has breast tenderness/enlargement been for you? |                              |                               |                |                        |                       |              |             | .       |
| No problem                                                                                         | 1013 (98.7%)                 | 209 (99.5%)                   | 404 (99.8%)    | 104 (96.3%)            | 47 (100.0%)           | 28 (93.3%)   | 221 (97.8%) | 0.0015  |
| Very small problem                                                                                 | 5 (0.5%)                     | 0 (0.0%)                      | 1 (0.2%)       | 3 (2.8%)               | 0 (0.0%)              | 0 (0.0%)     | 1 (0.4%)    | .       |
| Small problem                                                                                      | 5 (0.5%)                     | 1 (0.5%)                      | 0 (0.0%)       | 1 (0.9%)               | 0 (0.0%)              | 1 (3.3%)     | 2 (0.9%)    | .       |
| Moderate problem                                                                                   | 3 (0.3%)                     | 0 (0.0%)                      | 0 (0.0%)       | 0 (0.0%)               | 0 (0.0%)              | 1 (3.3%)     | 2 (0.9%)    | .       |
| Missing                                                                                            | 55                           | 12                            | 4              | 8                      |                       | 9            | 22          | .       |
| How big a problem during the last 4 weeks, if any, has feeling depressed been for you?             |                              |                               |                |                        |                       |              |             | .       |
| No problem                                                                                         | 784 (75.2%)                  | 167 (78.4%)                   | 332 (82.0%)    | 66 (58.4%)             | 34 (72.3%)            | 20 (64.5%)   | 165 (70.8%) | 0.0013  |
| Very small problem                                                                                 | 137 (13.1%)                  | 25 (11.7%)                    | 45 (11.1%)     | 21 (18.6%)             | 8 (17.0%)             | 5 (16.1%)    | 33 (14.2%)  | .       |
| Small problem                                                                                      | 76 (7.3%)                    | 14 (6.6%)                     | 20 (4.9%)      | 16 (14.2%)             | 2 (4.3%)              | 3 (9.7%)     | 21 (9.0%)   | .       |
| Moderate problem                                                                                   | 38 (3.6%)                    | 5 (2.3%)                      | 7 (1.7%)       | 9 (8.0%)               | 3 (6.4%)              | 3 (9.7%)     | 11 (4.7%)   | .       |
| Big problem                                                                                        | 7 (0.7%)                     | 2 (0.9%)                      | 1 (0.2%)       | 1 (0.9%)               | 0 (0.0%)              | 0 (0.0%)     | 3 (1.3%)    | .       |
| Missing                                                                                            | 39                           | 9                             | 4              | 3                      |                       | 8            | 15          | .       |
| How big a problem during the last 4 weeks, if any, has lack of energy been for you?                |                              |                               |                |                        |                       |              |             | .       |
| No problem                                                                                         | 631 (60.4%)                  | 127 (58.5%)                   | 277 (68.4%)    | 53 (47.3%)             | 25 (53.2%)            | 20 (64.5%)   | 129 (55.4%) | <.0001  |
| Very small problem                                                                                 | 214 (20.5%)                  | 48 (22.1%)                    | 77 (19.0%)     | 25 (22.3%)             | 15 (31.9%)            | 4 (12.9%)    | 45 (19.3%)  | .       |

EPIC-26 results - Active Surveillance

| Statistic Variable or Category                                                             | Active Surveillance (n=1081) | Australia/New Zealand (n=222) | Canada (n=409) | Central Europe (n=116) | United Kingdom (n=47) | Italy (n=39) | USA (n=248) | P Value |
|--------------------------------------------------------------------------------------------|------------------------------|-------------------------------|----------------|------------------------|-----------------------|--------------|-------------|---------|
| Small problem                                                                              | 128 (12.2%)                  | 31 (14.3%)                    | 36 (8.9%)      | 18 (16.1%)             | 4 (8.5%)              | 2 (6.5%)     | 37 (15.9%)  | .       |
| Moderate problem                                                                           | 56 (5.4%)                    | 10 (4.6%)                     | 10 (2.5%)      | 15 (13.4%)             | 2 (4.3%)              | 5 (16.1%)    | 14 (6.0%)   | .       |
| Big problem                                                                                | 16 (1.5%)                    | 1 (0.5%)                      | 5 (1.2%)       | 1 (0.9%)               | 1 (2.1%)              | 0 (0.0%)     | 8 (3.4%)    | .       |
| Missing                                                                                    | 36                           | 5                             | 4              | 4                      |                       | 8            | 15          | .       |
| How big a problem during the last 4 weeks, if any, has change in body weight been for you? |                              |                               |                |                        |                       |              |             | .       |
| No problem                                                                                 | 881 (84.5%)                  | 181 (83.8%)                   | 353 (87.2%)    | 89 (79.5%)             | 37 (82.2%)            | 29 (96.7%)   | 192 (82.1%) | 0.1859  |
| Very small problem                                                                         | 91 (8.7%)                    | 23 (10.6%)                    | 33 (8.1%)      | 11 (9.8%)              | 5 (11.1%)             | 0 (0.0%)     | 19 (8.1%)   | .       |
| Small problem                                                                              | 48 (4.6%)                    | 7 (3.2%)                      | 15 (3.7%)      | 7 (6.3%)               | 3 (6.7%)              | 0 (0.0%)     | 16 (6.8%)   | .       |
| Moderate problem                                                                           | 16 (1.5%)                    | 3 (1.4%)                      | 3 (0.7%)       | 4 (3.6%)               | 0 (0.0%)              | 0 (0.0%)     | 6 (2.6%)    | .       |
| Big problem                                                                                | 6 (0.6%)                     | 2 (0.9%)                      | 1 (0.2%)       | 1 (0.9%)               | 0 (0.0%)              | 1 (3.3%)     | 1 (0.4%)    | .       |
| Missing                                                                                    | 39                           | 6                             | 4              | 4                      | 2                     | 9            | 14          | .       |

**Characteristics of patients diagnosed as clinically localized or locally advanced.**

| <b>Statistic Variable or Category</b>                                                                  | <b>TNGR Global<br/>(n=13483)</b> | <b>Clinically<br/>Localized<br/>(n=12742)</b> | <b>Locally<br/>Advanced<br/>(n=566)</b> | <b>Unknown<br/>(n=175)</b> | <b>P Value</b> |
|--------------------------------------------------------------------------------------------------------|----------------------------------|-----------------------------------------------|-----------------------------------------|----------------------------|----------------|
| Urinary Incontinence                                                                                   |                                  |                                               |                                         |                            | .              |
| n                                                                                                      | 12855                            | 1154                                          | 196                                     | 200                        | 0.0563         |
| Mean (SD)                                                                                              | 92.8 (13.99)                     | 90.4 (16.78)                                  | 88.4 (17.86)                            | 89.5 (16.02)               | .              |
| Median (Q1-Q3)                                                                                         | 100.0 (91.8 - 100.0)             | 100.0 (85.5 - 100.0)                          | 100.0 (74.0 - 100.0)                    | 100.0 (79.3 - 100.0)       | .              |
| Min, Max                                                                                               | 0.0, 100.0                       | 0.0, 100.0                                    | 22.8, 100.0                             | 14.5, 100.0                | .              |
| Over the past 4 weeks, how often have you leaked urine?                                                |                                  |                                               |                                         |                            | .              |
| More than once a day                                                                                   | 515 (3.9%)                       | 467 (3.7%)                                    | 36 (6.4%)                               | 12 (6.9%)                  | 0.0001         |
| About once a day                                                                                       | 456 (3.4%)                       | 429 (3.4%)                                    | 20 (3.6%)                               | 7 (4.0%)                   | .              |
| More than once a week                                                                                  | 392 (2.9%)                       | 373 (3.0%)                                    | 13 (2.3%)                               | 6 (3.4%)                   | .              |
| About once a week                                                                                      | 547 (4.1%)                       | 508 (4.0%)                                    | 22 (3.9%)                               | 17 (9.7%)                  | .              |
| Rarely or never                                                                                        | 11432 (85.7%)                    | 10831 (85.9%)                                 | 468 (83.7%)                             | 133 (76.0%)                | .              |
| Missing                                                                                                | 141                              | 134                                           | 7                                       |                            | .              |
| Which of the following best describes your urinary control during the last 4 weeks?                    |                                  |                                               |                                         |                            | .              |
| No urinary control whatsoever                                                                          | 223 (1.7%)                       | 207 (1.6%)                                    | 14 (2.5%)                               | 2 (1.2%)                   | 0.0016         |
| Frequent dribbling                                                                                     | 355 (2.7%)                       | 321 (2.5%)                                    | 29 (5.2%)                               | 5 (2.9%)                   | .              |
| Occasional dribbling                                                                                   | 2957 (22.1%)                     | 2792 (22.1%)                                  | 116 (20.7%)                             | 49 (28.3%)                 | .              |
| Total control                                                                                          | 9825 (73.5%)                     | 9307 (73.7%)                                  | 401 (71.6%)                             | 117 (67.6%)                | .              |
| Missing                                                                                                | 123                              | 115                                           | 6                                       | 2                          | .              |
| How many pads or adult diapers per day did you usually use to control leakage during the last 4 weeks? |                                  |                                               |                                         |                            | .              |
| None                                                                                                   | 12969 (97.1%)                    | 12266 (97.1%)                                 | 530 (95.2%)                             | 173 (100.0%)               | 0.0012         |
| 1 pad per day                                                                                          | 285 (2.1%)                       | 270 (2.1%)                                    | 15 (2.7%)                               | 0 (0.0%)                   | .              |
| 2 pads per day                                                                                         | 64 (0.5%)                        | 58 (0.5%)                                     | 6 (1.1%)                                | 0 (0.0%)                   | .              |
| 3 or more pads per day                                                                                 | 40 (0.3%)                        | 34 (0.3%)                                     | 6 (1.1%)                                | 0 (0.0%)                   | .              |
| Missing                                                                                                | 125                              | 114                                           | 9                                       | 2                          | .              |
| How big a problem, if any, has dripping or leaking urine been for you during the last 4 weeks?         |                                  |                                               |                                         |                            | .              |
| No problem                                                                                             | 10192 (78.0%)                    | 9656 (78.2%)                                  | 413 (75.5%)                             | 123 (71.9%)                | <.0001         |
| Very small problem                                                                                     | 1915 (14.7%)                     | 1812 (14.7%)                                  | 74 (13.5%)                              | 29 (17.0%)                 | .              |
| Small problem                                                                                          | 603 (4.6%)                       | 562 (4.6%)                                    | 27 (4.9%)                               | 14 (8.2%)                  | .              |
| Moderate problem                                                                                       | 271 (2.1%)                       | 245 (2.0%)                                    | 22 (4.0%)                               | 4 (2.3%)                   | .              |
| Big problem                                                                                            | 79 (0.6%)                        | 67 (0.5%)                                     | 11 (2.0%)                               | 1 (0.6%)                   | .              |
| Missing                                                                                                | 423                              | 400                                           | 19                                      | 4                          | .              |



| <b>Statistic Variable or Category</b>                                                                          | <b>TNGR Global<br/>(n=13483)</b> | <b>Clinically<br/>Localized<br/>(n=12742)</b> | <b>Locally<br/>Advanced<br/>(n=566)</b> | <b>Unknown<br/>(n=175)</b> | <b>P Value</b> |
|----------------------------------------------------------------------------------------------------------------|----------------------------------|-----------------------------------------------|-----------------------------------------|----------------------------|----------------|
| Urinary Irritative/Obst.                                                                                       |                                  |                                               |                                         |                            | .              |
| n                                                                                                              | 12765                            | 1164                                          | 193                                     | 196                        | <0.0001        |
| Mean (SD)                                                                                                      | 86.0 (15.51)                     | 85.7 (15.43)                                  | 81.4 (17.57)                            | 83.3 (16.69)               | .              |
| Median (Q1-Q3)                                                                                                 | 87.5 (75.0 - 100.0)              | 87.5 (75.0 - 100.0)                           | 87.5 (68.8 - 93.8)                      | 87.5 (75.0 - 93.8)         | .              |
| Min, Max                                                                                                       | 0.0, 100.0                       | 18.8, 100.0                                   | 31.3, 100.0                             | 12.5, 100.0                | .              |
| How big a problem, if any, has pain or burning on urination been for you during the last 4 weeks?              |                                  |                                               |                                         |                            | .              |
| No problem                                                                                                     | 11299 (86.9%)                    | 10709 (87.1%)                                 | 445 (82.3%)                             | 145 (84.3%)                | 0.0002         |
| Very small problem                                                                                             | 1011 (7.8%)                      | 951 (7.7%)                                    | 43 (7.9%)                               | 17 (9.9%)                  | .              |
| Small problem                                                                                                  | 385 (3.0%)                       | 356 (2.9%)                                    | 24 (4.4%)                               | 5 (2.9%)                   | .              |
| Moderate problem                                                                                               | 225 (1.7%)                       | 198 (1.6%)                                    | 22 (4.1%)                               | 5 (2.9%)                   | .              |
| Big problem                                                                                                    | 89 (0.7%)                        | 82 (0.7%)                                     | 7 (1.3%)                                | 0 (0.0%)                   | .              |
| Missing                                                                                                        | 474                              | 446                                           | 25                                      | 3                          | .              |
| How big a problem, if any, has bleeding with urination been for you during the last 4 weeks?                   |                                  |                                               |                                         |                            | .              |
| No problem                                                                                                     | 12176 (94.1%)                    | 11520 (94.2%)                                 | 498 (93.1%)                             | 158 (92.4%)                | 0.1719         |
| Very small problem                                                                                             | 456 (3.5%)                       | 426 (3.5%)                                    | 20 (3.7%)                               | 10 (5.8%)                  | .              |
| Small problem                                                                                                  | 183 (1.4%)                       | 173 (1.4%)                                    | 9 (1.7%)                                | 1 (0.6%)                   | .              |
| Moderate problem                                                                                               | 95 (0.7%)                        | 89 (0.7%)                                     | 4 (0.7%)                                | 2 (1.2%)                   | .              |
| Big problem                                                                                                    | 29 (0.2%)                        | 25 (0.2%)                                     | 4 (0.7%)                                | 0 (0.0%)                   | .              |
| Missing                                                                                                        | 544                              | 509                                           | 31                                      | 4                          | .              |
| How big a problem, if any, has weak urine stream been for you during the last 4 weeks?                         |                                  |                                               |                                         |                            | .              |
| No problem                                                                                                     | 6361 (48.5%)                     | 6055 (48.9%)                                  | 235 (43.2%)                             | 71 (40.6%)                 | 0.0006         |
| Very small problem                                                                                             | 3194 (24.4%)                     | 3026 (24.4%)                                  | 120 (22.1%)                             | 48 (27.4%)                 | .              |
| Small problem                                                                                                  | 1930 (14.7%)                     | 1810 (14.6%)                                  | 90 (16.5%)                              | 30 (17.1%)                 | .              |
| Moderate problem                                                                                               | 1244 (9.5%)                      | 1153 (9.3%)                                   | 72 (13.2%)                              | 19 (10.9%)                 | .              |
| Big problem                                                                                                    | 384 (2.9%)                       | 350 (2.8%)                                    | 27 (5.0%)                               | 7 (4.0%)                   | .              |
| Missing                                                                                                        | 370                              | 348                                           | 22                                      |                            | .              |
| How big a problem, if any, has need to urinate frequently during the day been for you during the last 4 weeks? |                                  |                                               |                                         |                            | .              |
| No problem                                                                                                     | 6043 (45.8%)                     | 5751 (46.2%)                                  | 226 (40.9%)                             | 66 (37.7%)                 | 0.0029         |
| Very small problem                                                                                             | 2985 (22.6%)                     | 2833 (22.7%)                                  | 114 (20.6%)                             | 38 (21.7%)                 | .              |
| Small problem                                                                                                  | 2108 (16.0%)                     | 1972 (15.8%)                                  | 99 (17.9%)                              | 37 (21.1%)                 | .              |
| Moderate problem                                                                                               | 1576 (12.0%)                     | 1465 (11.8%)                                  | 86 (15.6%)                              | 25 (14.3%)                 | .              |
| Big problem                                                                                                    | 471 (3.6%)                       | 434 (3.5%)                                    | 28 (5.1%)                               | 9 (5.1%)                   | .              |
| Missing                                                                                                        | 300                              | 287                                           | 13                                      |                            | .              |

| <b>Statistic Variable or Category</b>                                                     | <b>TNGR Global<br/>(n=13483)</b> | <b>Clinically<br/>Localized<br/>(n=12742)</b> | <b>Locally<br/>Advanced<br/>(n=566)</b> | <b>Unknown<br/>(n=175)</b> | <b>P Value</b> |
|-------------------------------------------------------------------------------------------|----------------------------------|-----------------------------------------------|-----------------------------------------|----------------------------|----------------|
| Overall how big a problem has your urinary function been for you during the last 4 weeks? |                                  |                                               |                                         |                            | .              |
| No problem                                                                                | 7698 (58.2%)                     | 7327 (58.6%)                                  | 287 (52.2%)                             | 84 (48.3%)                 | 0.0001         |
| Very small problem                                                                        | 2780 (21.0%)                     | 2630 (21.0%)                                  | 110 (20.0%)                             | 40 (23.0%)                 | .              |
| Small problem                                                                             | 1449 (10.9%)                     | 1348 (10.8%)                                  | 73 (13.3%)                              | 28 (16.1%)                 | .              |
| Moderate problem                                                                          | 1031 (7.8%)                      | 953 (7.6%)                                    | 59 (10.7%)                              | 19 (10.9%)                 | .              |
| Big problem                                                                               | 276 (2.1%)                       | 252 (2.0%)                                    | 21 (3.8%)                               | 3 (1.7%)                   | .              |
| Missing                                                                                   | 249                              | 232                                           | 16                                      | 1                          | .              |
| Bowel                                                                                     |                                  |                                               |                                         |                            | .              |
| n                                                                                         | 12850                            | 1179                                          | 195                                     | 199                        | 0.0100         |
| Mean (SD)                                                                                 | 95.5 (9.84)                      | 94.7 (10.77)                                  | 93.8 (11.83)                            | 92.5 (12.04)               | .              |
| Median (Q1-Q3)                                                                            | 100.0 (95.8 - 100.0)             | 100.0 (95.8 - 100.0)                          | 100.0 (91.7 - 100.0)                    | 100.0 (87.5 - 100.0)       | .              |
| Min, Max                                                                                  | 8.3, 100.0                       | 20.8, 100.0                                   | 20.8, 100.0                             | 37.5, 100.0                | .              |
| How big a problem, if any, has urgency to have a bowel movement been for you?             |                                  |                                               |                                         |                            | .              |
| No problem                                                                                | 11159 (83.8%)                    | 10566 (83.9%)                                 | 463 (83.9%)                             | 130 (74.7%)                | 0.0071         |
| Very small problem                                                                        | 1225 (9.2%)                      | 1151 (9.1%)                                   | 44 (8.0%)                               | 30 (17.2%)                 | .              |
| Small problem                                                                             | 547 (4.1%)                       | 516 (4.1%)                                    | 22 (4.0%)                               | 9 (5.2%)                   | .              |
| Moderate problem                                                                          | 308 (2.3%)                       | 288 (2.3%)                                    | 16 (2.9%)                               | 4 (2.3%)                   | .              |
| Big problem                                                                               | 77 (0.6%)                        | 69 (0.5%)                                     | 7 (1.3%)                                | 1 (0.6%)                   | .              |
| Missing                                                                                   | 167                              | 152                                           | 14                                      | 1                          | .              |
| How big a problem, if any, has increased frequency of bowel movements been for you?       |                                  |                                               |                                         |                            | .              |
| No problem                                                                                | 11185 (86.7%)                    | 10601 (86.9%)                                 | 441 (84.2%)                             | 143 (82.7%)                | 0.0097         |
| Very small problem                                                                        | 1010 (7.8%)                      | 936 (7.7%)                                    | 50 (9.5%)                               | 24 (13.9%)                 | .              |
| Small problem                                                                             | 431 (3.3%)                       | 413 (3.4%)                                    | 14 (2.7%)                               | 4 (2.3%)                   | .              |
| Moderate problem                                                                          | 216 (1.7%)                       | 200 (1.6%)                                    | 15 (2.9%)                               | 1 (0.6%)                   | .              |
| Big problem                                                                               | 52 (0.4%)                        | 47 (0.4%)                                     | 4 (0.8%)                                | 1 (0.6%)                   | .              |
| Missing                                                                                   | 589                              | 545                                           | 42                                      | 2                          | .              |
| How big a problem, if any, has losing control of your stools been for you?                |                                  |                                               |                                         |                            | .              |
| No problem                                                                                | 12345 (96.0%)                    | 11682 (96.1%)                                 | 506 (96.2%)                             | 157 (91.3%)                | 0.0048         |
| Very small problem                                                                        | 330 (2.6%)                       | 303 (2.5%)                                    | 14 (2.7%)                               | 13 (7.6%)                  | .              |
| Small problem                                                                             | 113 (0.9%)                       | 109 (0.9%)                                    | 3 (0.6%)                                | 1 (0.6%)                   | .              |
| Moderate problem                                                                          | 46 (0.4%)                        | 43 (0.4%)                                     | 3 (0.6%)                                | 0 (0.0%)                   | .              |
| Big problem                                                                               | 22 (0.2%)                        | 21 (0.2%)                                     | 0 (0.0%)                                | 1 (0.6%)                   | .              |
| Missing                                                                                   | 627                              | 584                                           | 40                                      | 3                          | .              |

| Statistic Variable or Category                                                          | TNGR Global<br>(n=13483) | Clinically<br>Localized<br>(n=12742) | Locally<br>Advanced<br>(n=566) | Unknown<br>(n=175) | P Value |
|-----------------------------------------------------------------------------------------|--------------------------|--------------------------------------|--------------------------------|--------------------|---------|
| How big a problem, if any, has bloody stools been for you?                              |                          |                                      |                                |                    | .       |
| No problem                                                                              | 12445 (96.7%)            | 11769 (96.7%)                        | 510 (97.5%)                    | 166 (96.0%)        | 0.0049  |
| Very small problem                                                                      | 291 (2.3%)               | 279 (2.3%)                           | 5 (1.0%)                       | 7 (4.0%)           | .       |
| Small problem                                                                           | 95 (0.7%)                | 91 (0.7%)                            | 4 (0.8%)                       | 0 (0.0%)           | .       |
| Moderate problem                                                                        | 28 (0.2%)                | 26 (0.2%)                            | 2 (0.4%)                       | 0 (0.0%)           | .       |
| Big problem                                                                             | 6 (0.0%)                 | 4 (0.0%)                             | 2 (0.4%)                       | 0 (0.0%)           | .       |
| Missing                                                                                 | 618                      | 573                                  | 43                             | 2                  | .       |
| How big a problem, if any, has abdominal/pelvic/rectal pain been for you?               |                          |                                      |                                |                    | .       |
| No problem                                                                              | 10960 (85.0%)            | 10382 (85.2%)                        | 430 (81.0%)                    | 148 (85.5%)        | 0.0057  |
| Very small problem                                                                      | 1127 (8.7%)              | 1051 (8.6%)                          | 62 (11.7%)                     | 14 (8.1%)          | .       |
| Small problem                                                                           | 463 (3.6%)               | 436 (3.6%)                           | 19 (3.6%)                      | 8 (4.6%)           | .       |
| Moderate problem                                                                        | 268 (2.1%)               | 256 (2.1%)                           | 11 (2.1%)                      | 1 (0.6%)           | .       |
| Big problem                                                                             | 76 (0.6%)                | 65 (0.5%)                            | 9 (1.7%)                       | 2 (1.2%)           | .       |
| Missing                                                                                 | 589                      | 552                                  | 35                             | 2                  | .       |
| Overall, how big a problem have your bowel habits been for you during the last 4 weeks? |                          |                                      |                                |                    | .       |
| No problem                                                                              | 11200 (83.9%)            | 10608 (84.1%)                        | 461 (82.2%)                    | 131 (75.7%)        | 0.0018  |
| Very small problem                                                                      | 1324 (9.9%)              | 1234 (9.8%)                          | 60 (10.7%)                     | 30 (17.3%)         | .       |
| Small problem                                                                           | 472 (3.5%)               | 449 (3.6%)                           | 14 (2.5%)                      | 9 (5.2%)           | .       |
| Moderate problem                                                                        | 273 (2.0%)               | 250 (2.0%)                           | 20 (3.6%)                      | 3 (1.7%)           | .       |
| Big problem                                                                             | 82 (0.6%)                | 76 (0.6%)                            | 6 (1.1%)                       | 0 (0.0%)           | .       |
| Missing                                                                                 | 132                      | 125                                  | 5                              | 2                  | .       |
| Sexual                                                                                  |                          |                                      |                                |                    | .       |
| n                                                                                       | 12575                    | 1158                                 | 188                            | 200                | <.0001  |
| Mean (SD)                                                                               | 62.0 (29.34)             | 59.2 (30.99)                         | 41.0 (29.75)                   | 53.3 (31.77)       | .       |
| Median (Q1-Q3)                                                                          | 66.7 (38.8 - 87.5)       | 62.5 (32.0 - 87.5)                   | 34.7 (16.7 - 63.0)             | 59.0 (20.8 - 83.3) | .       |
| Min, Max                                                                                | 0.0, 100.0               | 0.0, 100.0                           | 0.0, 100.0                     | 0.0, 100.0         | .       |
| How would you rate your ability to have an erection during the last 4 weeks?            |                          |                                      |                                |                    | .       |
| Very poor to none                                                                       | 1834 (14.3%)             | 1684 (13.9%)                         | 121 (22.2%)                    | 29 (17.2%)         | <.0001  |
| Poor                                                                                    | 1873 (14.6%)             | 1753 (14.4%)                         | 102 (18.8%)                    | 18 (10.7%)         | .       |
| Fair                                                                                    | 3204 (24.9%)             | 3042 (25.1%)                         | 122 (22.4%)                    | 40 (23.7%)         | .       |
| Good                                                                                    | 3844 (29.9%)             | 3654 (30.1%)                         | 140 (25.7%)                    | 50 (29.6%)         | .       |
| Very good                                                                               | 2101 (16.3%)             | 2010 (16.6%)                         | 59 (10.8%)                     | 32 (18.9%)         | .       |
| Missing                                                                                 | 627                      | 599                                  | 22                             | 6                  | .       |

| <b>Statistic Variable or Category</b>                                                  | <b>TNGR Global<br/>(n=13483)</b> | <b>Clinically<br/>Localized<br/>(n=12742)</b> | <b>Locally<br/>Advanced<br/>(n=566)</b> | <b>Unknown<br/>(n=175)</b> | <b>P Value</b> |
|----------------------------------------------------------------------------------------|----------------------------------|-----------------------------------------------|-----------------------------------------|----------------------------|----------------|
| How would you rate your ability to reach orgasm (climax) during the last 4 weeks?      |                                  |                                               |                                         |                            | .              |
| Very poor to none                                                                      | 1708 (13.5%)                     | 1574 (13.2%)                                  | 108 (20.2%)                             | 26 (15.3%)                 | <.0001         |
| Poor                                                                                   | 1552 (12.3%)                     | 1455 (12.2%)                                  | 82 (15.3%)                              | 15 (8.8%)                  | .              |
| Fair                                                                                   | 2763 (21.9%)                     | 2611 (21.9%)                                  | 108 (20.2%)                             | 44 (25.9%)                 | .              |
| Good                                                                                   | 4209 (33.3%)                     | 3996 (33.5%)                                  | 166 (31.0%)                             | 47 (27.6%)                 | .              |
| Very good                                                                              | 2397 (19.0%)                     | 2288 (19.2%)                                  | 71 (13.3%)                              | 38 (22.4%)                 | .              |
| Missing                                                                                | 854                              | 818                                           | 31                                      | 5                          | .              |
| How would you describe the usual quality of your erections during the last 4 weeks?    |                                  |                                               |                                         |                            | .              |
| None at all                                                                            | 1869 (14.7%)                     | 1720 (14.3%)                                  | 126 (23.2%)                             | 23 (13.5%)                 | <.0001         |
| Not firm enough for any sexual activity                                                | 1655 (13.0%)                     | 1567 (13.0%)                                  | 68 (12.5%)                              | 20 (11.8%)                 | .              |
| Firm enough for masturbation and foreplay                                              | 2360 (18.5%)                     | 2210 (18.4%)                                  | 111 (20.5%)                             | 39 (22.9%)                 | .              |
| Firm enough for intercourse                                                            | 6855 (53.8%)                     | 6530 (54.3%)                                  | 237 (43.7%)                             | 88 (51.8%)                 | .              |
| Missing                                                                                | 744                              | 715                                           | 24                                      | 5                          | .              |
| How would you describe the frequency of your erections during the last 4 weeks?        |                                  |                                               |                                         |                            | .              |
| I never had an erection when I wanted one                                              | 1952 (15.7%)                     | 1795 (15.3%)                                  | 130 (24.2%)                             | 27 (16.3%)                 | <.0001         |
| I had an erection less than half the time I wanted one                                 | 1741 (14.0%)                     | 1635 (13.9%)                                  | 86 (16.0%)                              | 20 (12.0%)                 | .              |
| I had an erection about half the time I wanted one                                     | 1807 (14.5%)                     | 1704 (14.5%)                                  | 80 (14.9%)                              | 23 (13.9%)                 | .              |
| I had an erection more than half the time I wanted one                                 | 2038 (16.3%)                     | 1934 (16.4%)                                  | 70 (13.0%)                              | 34 (20.5%)                 | .              |
| I had an erection whenever I wanted one                                                | 4931 (39.5%)                     | 4697 (39.9%)                                  | 172 (32.0%)                             | 62 (37.3%)                 | .              |
| Missing                                                                                | 1014                             | 977                                           | 28                                      | 9                          | .              |
| Overall, how would you rate your ability to function sexually during the last 4 weeks? |                                  |                                               |                                         |                            | .              |
| No problem                                                                             | 1956 (15.4%)                     | 1806 (15.1%)                                  | 119 (22.0%)                             | 31 (18.3%)                 | <.0001         |
| Very small problem                                                                     | 1937 (15.3%)                     | 1811 (15.1%)                                  | 106 (19.6%)                             | 20 (11.8%)                 | .              |
| Small problem                                                                          | 3058 (24.1%)                     | 2900 (24.2%)                                  | 117 (21.7%)                             | 41 (24.3%)                 | .              |
| Moderate problem                                                                       | 3865 (30.5%)                     | 3679 (30.7%)                                  | 141 (26.1%)                             | 45 (26.6%)                 | .              |
| Big problem                                                                            | 1876 (14.8%)                     | 1787 (14.9%)                                  | 57 (10.6%)                              | 32 (18.9%)                 | .              |
| Missing                                                                                | 791                              | 759                                           | 26                                      | 6                          | .              |

| <b>Statistic Variable or Category</b>                                                              | <b>TNGR Global<br/>(n=13483)</b> | <b>Clinically<br/>Localized<br/>(n=12742)</b> | <b>Locally<br/>Advanced<br/>(n=566)</b> | <b>Unknown<br/>(n=175)</b> | <b>P Value</b> |
|----------------------------------------------------------------------------------------------------|----------------------------------|-----------------------------------------------|-----------------------------------------|----------------------------|----------------|
| Overall, how big a problem have your sexual functions been for you during the last 4 weeks?        |                                  |                                               |                                         |                            | .              |
| No problem                                                                                         | 6212 (48.9%)                     | 5893 (49.1%)                                  | 247 (45.3%)                             | 72 (42.6%)                 | 0.0812         |
| Very small problem                                                                                 | 2018 (15.9%)                     | 1887 (15.7%)                                  | 93 (17.1%)                              | 38 (22.5%)                 | .              |
| Small problem                                                                                      | 2058 (16.2%)                     | 1949 (16.2%)                                  | 86 (15.8%)                              | 23 (13.6%)                 | .              |
| Moderate problem                                                                                   | 1605 (12.6%)                     | 1500 (12.5%)                                  | 84 (15.4%)                              | 21 (12.4%)                 | .              |
| Big problem                                                                                        | 823 (6.5%)                       | 773 (6.4%)                                    | 35 (6.4%)                               | 15 (8.9%)                  | .              |
| Missing                                                                                            | 767                              | 740                                           | 21                                      | 6                          | .              |
| Hormonal                                                                                           |                                  |                                               |                                         |                            | .              |
| n                                                                                                  | 12664                            | 1175                                          | 197                                     | 200                        | 0.6720         |
| Mean (SD)                                                                                          | 90.2 (13.55)                     | 90.1 (13.31)                                  | 86.4 (16.31)                            | 87.8 (15.39)               | .              |
| Median (Q1-Q3)                                                                                     | 95.0 (85.0 - 100.0)              | 95.0 (85.0 - 100.0)                           | 90.0 (80.0 - 100.0)                     | 93.8 (85.0 - 100.0)        | .              |
| Min, Max                                                                                           | 0.0, 100.0                       | 20.0, 100.0                                   | 25.0, 100.0                             | 25.0, 100.0                | .              |
| How big a problem during the last 4 weeks, if any, have hot flashes been for you?                  |                                  |                                               |                                         |                            | .              |
| No problem                                                                                         | 11460 (89.5%)                    | 10849 (89.6%)                                 | 452 (85.8%)                             | 159 (93.0%)                | 0.0011         |
| Very small problem                                                                                 | 669 (5.2%)                       | 636 (5.3%)                                    | 29 (5.5%)                               | 4 (2.3%)                   | .              |
| Small problem                                                                                      | 357 (2.8%)                       | 327 (2.7%)                                    | 29 (5.5%)                               | 1 (0.6%)                   | .              |
| Moderate problem                                                                                   | 237 (1.9%)                       | 220 (1.8%)                                    | 11 (2.1%)                               | 6 (3.5%)                   | .              |
| Big problem                                                                                        | 83 (0.6%)                        | 76 (0.6%)                                     | 6 (1.1%)                                | 1 (0.6%)                   | .              |
| Missing                                                                                            | 677                              | 634                                           | 39                                      | 4                          | .              |
| How big a problem during the last 4 weeks, if any, has breast tenderness/enlargement been for you? |                                  |                                               |                                         |                            | .              |
| No problem                                                                                         | 11704 (97.6%)                    | 11060 (97.6%)                                 | 478 (97.4%)                             | 166 (97.1%)                | 0.7825         |
| Very small problem                                                                                 | 156 (1.3%)                       | 146 (1.3%)                                    | 6 (1.2%)                                | 4 (2.3%)                   | .              |
| Small problem                                                                                      | 72 (0.6%)                        | 68 (0.6%)                                     | 3 (0.6%)                                | 1 (0.6%)                   | .              |
| Moderate problem                                                                                   | 49 (0.4%)                        | 45 (0.4%)                                     | 4 (0.8%)                                | 0 (0.0%)                   | .              |
| Big problem                                                                                        | 10 (0.1%)                        | 10 (0.1%)                                     | 0 (0.0%)                                | 0 (0.0%)                   | .              |
| Missing                                                                                            | 1492                             | 1413                                          | 75                                      | 4                          | .              |
| How big a problem during the last 4 weeks, if any, has feeling depressed been for you?             |                                  |                                               |                                         |                            | .              |
| No problem                                                                                         | 8364 (65.7%)                     | 7906 (65.7%)                                  | 353 (67.4%)                             | 105 (61.8%)                | 0.0260         |
| Very small problem                                                                                 | 1929 (15.2%)                     | 1828 (15.2%)                                  | 69 (13.2%)                              | 32 (18.8%)                 | .              |
| Small problem                                                                                      | 1322 (10.4%)                     | 1254 (10.4%)                                  | 46 (8.8%)                               | 22 (12.9%)                 | .              |
| Moderate problem                                                                                   | 813 (6.4%)                       | 773 (6.4%)                                    | 33 (6.3%)                               | 7 (4.1%)                   | .              |
| Big problem                                                                                        | 295 (2.3%)                       | 268 (2.2%)                                    | 23 (4.4%)                               | 4 (2.4%)                   | .              |

| <b>Statistic Variable or Category</b>                                                      | <b>TNGR Global<br/>(n=13483)</b> | <b>Clinically<br/>Localized<br/>(n=12742)</b> | <b>Locally<br/>Advanced<br/>(n=566)</b> | <b>Unknown<br/>(n=175)</b> | <b>P Value</b> |
|--------------------------------------------------------------------------------------------|----------------------------------|-----------------------------------------------|-----------------------------------------|----------------------------|----------------|
| Missing                                                                                    | 760                              | 713                                           | 42                                      | 5                          | .              |
| How big a problem during the last 4 weeks, if any, has lack of energy been for you?        |                                  |                                               |                                         |                            | .              |
| No problem                                                                                 | 7499 (58.5%)                     | 7088 (58.5%)                                  | 323 (61.3%)                             | 88 (51.2%)                 | 0.0074         |
| Very small problem                                                                         | 2492 (19.4%)                     | 2356 (19.4%)                                  | 86 (16.3%)                              | 50 (29.1%)                 | .              |
| Small problem                                                                              | 1609 (12.6%)                     | 1538 (12.7%)                                  | 55 (10.4%)                              | 16 (9.3%)                  | .              |
| Moderate problem                                                                           | 889 (6.9%)                       | 832 (6.9%)                                    | 44 (8.3%)                               | 13 (7.6%)                  | .              |
| Big problem                                                                                | 326 (2.5%)                       | 302 (2.5%)                                    | 19 (3.6%)                               | 5 (2.9%)                   | .              |
| Missing                                                                                    | 668                              | 626                                           | 39                                      | 3                          | .              |
| How big a problem during the last 4 weeks, if any, has change in body weight been for you? |                                  |                                               |                                         |                            | .              |
| No problem                                                                                 | 10473 (82.0%)                    | 9905 (82.0%)                                  | 426 (81.6%)                             | 142 (83.0%)                | 0.5285         |
| Very small problem                                                                         | 1160 (9.1%)                      | 1103 (9.1%)                                   | 40 (7.7%)                               | 17 (9.9%)                  | .              |
| Small problem                                                                              | 649 (5.1%)                       | 613 (5.1%)                                    | 28 (5.4%)                               | 8 (4.7%)                   | .              |
| Moderate problem                                                                           | 351 (2.7%)                       | 330 (2.7%)                                    | 18 (3.4%)                               | 3 (1.8%)                   | .              |
| Big problem                                                                                | 136 (1.1%)                       | 125 (1.0%)                                    | 10 (1.9%)                               | 1 (0.6%)                   | .              |
| Missing                                                                                    | 714                              | 666                                           | 44                                      | 4                          | .              |
